# Supplementary material
Source: PubMed Central journal article supplement (PMC3395807)
Supplement: NIHMS388302-supplement-Supplemental_Data.pdf [file NIHMS388302-supplement-Supplemental_Data.pdf]

## Supporting Information

### Design, Synthesis, and Biological Evaluation of *N*-Alkylated Deoxynojirimycin (DNJ) Derivatives for the Treatment of Dengue Virus Infection

Wenquan Yu,<sup>†,‡,§</sup> Tina Gill,<sup>‡</sup> Lijuan Wang,<sup>‡</sup> Yanming Du,<sup>†</sup> Hong Ye,<sup>†</sup> Xiaowang Qu,<sup>‡</sup> Ju-Tao Guo,<sup>‡</sup> Andrea Cuconati,<sup>†</sup> Kang  
Zhao,<sup>§</sup> Timothy M. Block,<sup>†,‡</sup> Xiaodong Xu,<sup>\*,†</sup> and Jinhong Chang<sup>\*,‡</sup>

<sup>†</sup>*Institute for Hepatitis and Virus Research, Hepatitis B Foundation, Doylestown, Pennsylvania 18902, United States;* <sup>‡</sup>*Drexel  
Institute for Biotechnology and Virology Research, Drexel University College of Medicine, Doylestown, Pennsylvania 18902,  
United States;* <sup>§</sup>*School of Pharmaceutical Science and Technology, Tianjin University, Tianjin 300072, P. R. China*

\* [michael@ihvr.org](mailto:michael@ihvr.org) & [Jinhong.chang@drexelmed.edu](mailto:Jinhong.chang@drexelmed.edu)

#### CONTENTS:

|                                                 |            |
|-------------------------------------------------|------------|
| <b>1. Synthesis of Compounds 1-5 and 7.....</b> | <b>S2</b>  |
| <b>2. NMR Spectra of Compounds 1-7.....</b>     | <b>S27</b> |
| <b>3. X-ray Structure and Data of 3l.....</b>   | <b>S52</b> |

## 1. Synthesis of Compounds 1-5 and 7

**General information.**  $^1\text{H}$  NMR spectra were recorded on a 300 MHz INOVA VARIAN spectrometer. Chemical shifts values are given in ppm and referred as the internal standard to TMS (tetramethylsilane). The peak patterns are indicated as follows: s, singlet; d, doublet; t, triplet; q, quadruplet; m, multiplet and dd, doublet of doublets. The coupling constants ( $J$ ) are reported in Hertz (Hz). Optical rotations were recorded on a JASCO P-2000 Digital Polarimeter. The data was collected at 24 °C in a 10 cm cell in methanol.  $[\alpha]_D$  values are given in  $10^{-1} \text{ deg} \cdot \text{cm}^2 \text{ g}^{-1}$  (concentration  $c$  is given as g/100 mL). Mass Spectra were obtained on a 1200 Aligent LC-MS spectrometer (ES-API, Positive). Silica gel column chromatography was performed over silica gel 100-200 mesh, and the eluent was a mixture of ethyl acetate and hexanes, or mixture of methanol and ethyl acetate. All the tested compounds possess a purity of at least 95%. Analytical HPLC was run on the Agilent 1100 HPLC instrument, equipped with Agilent, ZORBAX SB-C18 column and UV detection at 210 nm. Eluent system was: A (Water, 0.1% Formic acid) and B (Methanol, 0.1% Formic acid); flow rate = 1 mL/min; Method A: 45%A, 55%B (**3a-3d**, **3i-3m**, **3s-3v**, **4a-4c** and **5c-5e**); Method B: 35%A, 65%B (**3h**, **3n-3r** and **4d-4f**); Method C: 25%A, 75%B (**3e-3g**). For compounds **1a-1c**, **2a-2l**, **5a-5b**, **6** and **7**, the purity was determined based on  $^1\text{H}$  NMR.

### *a. Synthesis of (2R,3R,4R,5S)-1-(7-Ethyl-7-hydroxynonyl)-2-(hydroxymethyl) piperidine-3,4,5-triol (7).*

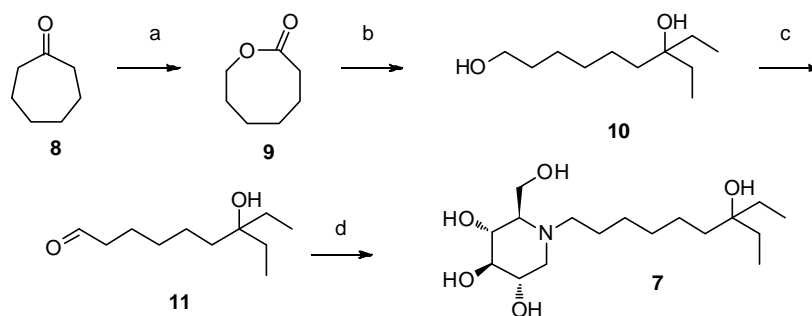

(a) *m*CPBA,  $\text{CH}_2\text{Cl}_2$ , rt, 41%; (b) EtMgBr (1 M in THF), THF, Argon, 0 °C, then sat.  $\text{NH}_4\text{Cl}$  (a.q.), 87%; (c) PCC,  $\text{CH}_2\text{Cl}_2$ , rt, 69%; (d) DNJ, HOAc, EtOH; then  $\text{H}_2$  (45 psi), 5% Pd/C, EtOH, 61%

*a.a Preparation of Oxocan-2-one (9).* Cycloheptanone (**8**, 5.60g, 50 mmol) in dichloromethane (75 mL) was added dropwise to a solution of *meta*-chloroperoxybenzoic acid (*m*CPBA, 16.80 g, 75 mmol) in dichloromethane (50 mL) at 0 °C. After addition, the reaction mixture was stirred at room temperature in the dark for 5 days. The solid was removed by filtration, and the filtrate was washed with sat. sodium bicarbonate solution (50 mL), followed by brine (50 mL). The organic layer was dried over anhydrous sodium sulfate and concentrated to give a residue, which was slurried in a mixture of ethyl acetate and hexanes (10 : 90). The solid was filtered off and the solvent was evaporated to afford the crude product, which was further purified through silica gel column chromatography (ethyl acetate : hexanes = 10 : 90) to give 2.60 g of pure compound **9** as colorless oil. Yield, 41%.

*a.b. Preparation of 7-Ethylnonane-1,7-diol (10).* Oxocan-2-one (**9**, 1.98 g, 15.5 mmol) in tetrahydrofuran (THF, 30 mL) was added dropwise to a solution of ethylmagnesium bromide in THF (1 M, 75.5 mL, 75.5 mmol) at 0 °C under Argon atmosphere. After addition, the reaction mixture was stirred and allowed to warm up to room temperature over 2 hours. The reaction was quenched with cold sat. ammonium chloride solution (50 mL), and then extracted with ethyl acetate (30 mL x 3). The combined organic layer was dried over anhydrous sodium sulfate and concentrated to give the crude product, which was further purified through silica gel column chromatography (ethyl acetate : hexanes = 30 : 70) to afford 2.53 g of pure compound **10** as colorless oil. Yield, 87%.

*a.c. Preparation of 7-Ethyl-7-hydroxynonanal (11).* 7-Ethylnonane-1,7-diol (**10**, 3.35 g, 17.8 mmol) in dry dichloromethane (40 mL) was added to a suspension of pyridinium chlorochromate (PCC, 4.60 g, 21.3 mmol) in dry dichloromethane (60 mL). The reaction mixture was stirred at room temperature for 6 hours, and then filtered through a silica gel pad and washed with ethyl acetate (50 mL). The filtrate was concentrated and purified through silica gel column chromatography (ethyl acetate : hexanes = 20 : 80) to afford 2.30 g of pure compound **11** as colorless oil. Yield, 69%.

*a.d. Synthesis of (2R,3R,4R,5S)-1-(7-Ethyl-7-hydroxynonyl)-2-(hydroxymethyl) piperidine-3,4,5-triol (7).* A solution of 1-deoxynojirimycin (DNJ, 653 mg, 4.0 mmol) in acetic acid (8 mL) was stirred at room temperature overnight, and then the solvent was removed under reduced pressure. The resulting residue was treated with 200 proof ethanol (20 mL) and 7-ethyl-7-hydroxynonanal (**11**, 969 mg, 5.2 mmol), followed by acetic acid (0.5 mL). The reaction mixture was stirred at room temperature under Argon atmosphere for another 2 hours. Then, it was transferred to the hydrogenation bottle, followed by addition of 5% Pd/C (160 mg) and 200 proof ethanol (10 mL). The mixture was hydrogenated under 45 psi of H<sub>2</sub> for 24 hours. After the reaction was complete, it was filtered through a silica gel pad. The filtrate was concentrated and purified through silica gel column chromatography (methanol : ethyl acetate = 30 : 70) to afford 0.81 g of pure compound **7** as white solid. Yield, 61%. <sup>1</sup>H NMR (300 MHz, CD<sub>3</sub>OD): δ 3.85 (d, *J* = 7.2 Hz, 2H, OCH<sub>2</sub>), 3.52-3.44 (m, 1H, OCH), 3.36 (t, *J* = 9.3 Hz, 1H, OCH), 3.13 (t, *J* = 9.0 Hz, 1H, OCH), 3.02 (dd, *J* = 11.4, 5.1 Hz, 1H, NCH), 2.89-2.79 (m, 1H, NCH), 2.67-2.57 (m, 1H, NCH), 2.27-2.15 (m, 2H, 2 x NCH), 1.52-1.33 (m, 14H), 0.84 (t, *J* = 7.5 Hz, 6H, 2 x CH<sub>3</sub>). MS: MH<sup>+</sup> = 334.

### *b. Synthesis of DNJ Derivatives 1-2.*

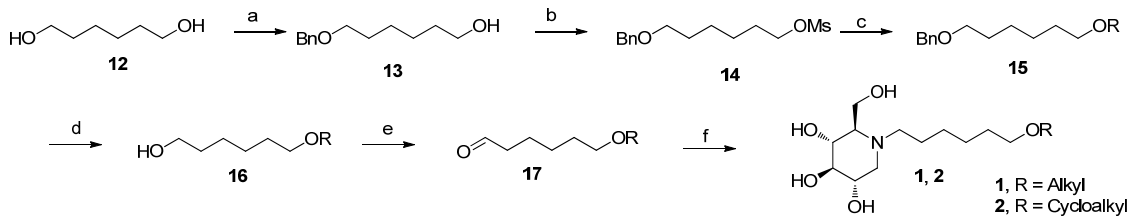

(a) BnBr, KOH, 18-Crown-6, THF, rt, 55%; (b) MeSO<sub>2</sub>Cl, Pyr., 0 °C, 97%; (c) ROH, NaH (60%), DMF, 75 °C; (d) H<sub>2</sub> (60psi), 10% Pd/C, EtOH; (e) PCC, CH<sub>2</sub>Cl<sub>2</sub>, Argon, rt; (f) DNJ, HOAc, EtOH; then H<sub>2</sub> (45psi), 10% Pd/C, EtOH

*b.a. Preparation of 6-(Benzyloxy)hexan-1-ol (13).* To a stirring solution of 1,6-hexanediol (**12**, 23.15 g, 196 mmol) and 18-crown-6 (2.15 g, 8 mmol) in THF (200 mL) at 0 °C, was added finely ground potassium hydroxide (10.06 g, 179 mmol), followed by the addition of benzyl bromide (19.4 mL, 163 mmol). The reaction mixture was stirred for 48 hours at room temperature, and then washed with brine

(200 mL). The aqueous layer was extracted with ethyl acetate (100 mL x 2). All the organic layer was combined, dried over anhydrous sodium sulfate and concentrated to give the crude product, which was further purified through silica gel column chromatography (ethyl acetate : hexanes = 20 : 80) to afford 22.42 g of pure compound **13** as colorless oil. Yield was 55%.

*b.b. Preparation of 6-(Benzyloxy)hexyl Methanesulfonate (14).* To a stirring solution of 6-(benzyloxy)hexan-1-ol (**13**, 21.42 g, 103 mmol) in pyridine (100 mL) at 0 °C, methanesulfonyl chloride (9.6 mL, 123 mmol) was added dropwise. After addition, the reaction mixture was stirred at 0 °C for 3 hours. Then, the reaction was quenched into ice water (100 mL), and the pH was adjusted to 1~2 with 2 N hydrochloric acid (HCl). The mixture was extracted with dichloromethane (100 mL x 3). The combined organic layer was dried over anhydrous sodium sulfate, concentrated and purified through silica gel column chromatography (ethyl acetate : hexanes = 10 : 90 to 20 : 80) to afford 28.50 g of pure compound **14** as colorless oil. Yield, 97%.

*b.c. General Procedure for the Preparation of Intermediates 16.* To a solution of the alcohol **15** (6 mmol) in anhydrous dimethylformamide (DMF, 10 mL) at room temperature, NaH (60%, 480 mg, 12 mmol) was added. The mixture was stirred at room temperature for 90 min and treated with a solution of 6-(benzyloxy)hexyl methanesulfonate (**14**, 1.43 g, 5mmol) in anhydrous DMF (5 mL). The reaction mixture was then heated to 75 °C for 1 hour. After cooling to room temperature, the reaction was quenched with ice/water (50 mL) and extracted with ethyl acetate (30 mL x 3). The combined organic layer was dried over anhydrous sodium sulfate, concentrated and purified through silica gel column chromatography (ethyl acetate : hexanes = 0 : 100 to 2 : 98) to afford the pure compound **16**.

*b.d. General Procedure for the Preparation of Alcohols 17.* A reaction mixture of the compound **16** (606 mg) and 10% Pd/C (242 mg) in 200 proof ethanol (20 mL) was hydrogenated under 60 psi of H<sub>2</sub> for 24 hours. After the reaction was complete, it was treated with celite (800 mg), and then filtered

through a silica gel pad. The filtrate was concentrated and purified through silica gel column chromatography (ethyl acetate : hexanes = 5 : 95 to 30 : 70) to afford the pure compound **17**.

*b.e. General Procedure for the Preparation of Aldehydes 18.* To a stirred suspension of PCC (647 mg, 3 mmol) and silica gel (647 mg) in dry dichloromethane (10 mL), was added a solution of the alcohol **17** (2 mmol) in dichloromethane (10 mL). The reaction mixture was stirred at room temperature under argon atmosphere for 4 hours. Then, it was filtered through a silica gel pad, and washed with ethyl acetate (20 mL). The filtrate was concentrated and then purified through silica gel column chromatography (ethyl acetate : hexanes = 0 : 100 to 15 : 85) to afford the pure compound **18**.

*b.f. General Procedure for the Synthesis of DNJ Derivatives 1-2.* A solution of DNJ (33 mg, 0.2 mmol) in acetic acid (1 mL) was stirred at room temperature overnight. The solvent was then removed under reduced pressure. The resulting residue was treated with 200 proof ethanol (5 mL) and the aldehyde **18** (0.26 mmol), followed by acetic acid (2 drops as catalyst). The reaction mixture was stirred at room temperature under argon atmosphere for another hour. Then, it was transferred to the hydrogenation bottle, followed by addition of 10% Pd/C (32 mg) and 200 proof ethanol (5 mL). The mixture was hydrogenated under 45 psi of H<sub>2</sub> for 24 hours. After the reaction was complete, it was treated with celite (100 mg), and then filtered through a silica gel pad. The filtrate was concentrated and purified through silica gel column chromatography (methanol : ethyl acetate = 5 : 95 to 20 : 80) to afford the pure compound **1** or **2**.

**(2R,3R,4R,5S)-2-(Hydroxymethyl)-1-(6-(pentan-3-yloxy)hexyl)piperidine-3,4,5-triol (1a).**

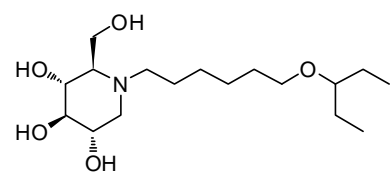

White semi-solid. Yield, 87%. <sup>1</sup>H NMR (300 MHz, CD<sub>3</sub>OD): δ 3.85 (d, *J* = 2.4 Hz, 2H, OCH<sub>2</sub>), 3.50-3.43 (m, 3H, 3 x OCH), 3.36 (t, *J* = 9.3 Hz, 1H, OCH), 3.16-3.10 (m, 2H, 2 x OCH), 3.00 (dd, *J* = 11.4, 5.1 Hz, 1H,

NCH), 2.83-2.80 (m, 1H, NCH), 2.63-2.60 (m, 1H, NCH), 2.24-2.13 (m, 2H, 2 x NCH), 1.59-1.28 (m, 12H, 6 x CH<sub>2</sub>), 0.90 (t, *J* = 7.5 Hz, 6H, 2 x CH<sub>3</sub>). MS: calculated for MH<sup>+</sup> = 334, found 334.

**(2R,3R,4R,5S)-1-(6-((2,4-Dimethylpentan-3-yl)oxy)hexyl)-2-(hydroxymethyl)piperidine-3,4,5-triol**

**(1b).**

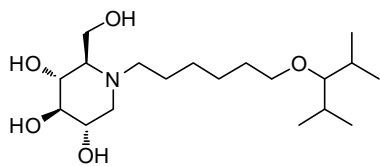

White semi-solid. Yield, 49%.  $^1\text{H NMR}$  (300 MHz,  $\text{CD}_3\text{OD}$ ):  $\delta$  3.87 (d,  $J$  = 2.7 Hz, 2H,  $\text{OCH}_2$ ), 3.55-3.45 (m, 3H, 3 x OCH), 3.38 (t,  $J$  = 9.6 Hz, 1H, OCH), 3.15 (t,  $J$  = 9.3 Hz, 1H, OCH), 3.05 (dd,  $J$  = 11.4, 4.8 Hz, 1H,

NCH), 2.88-2.83 (m, 1H, NCH), 2.71-2.65 (m, 2H, NCH and OCH overlapped), 2.32-2.22 (m, 2H, 2 x NCH), 1.84-1.73 (m, 2H, 2 x CH), 1.60-1.29 (m, 8H, 4 x  $\text{CH}_2$ ), 0.91 (dd,  $J$  = 6.9, 1.5 Hz, 12H, 2 x  $\text{C}(\text{CH}_3)_2$ ). MS: calculated for  $\text{MH}^+$  = 362, found 362.

**(2R,3R,4R,5S)-1-(6-(Heptan-4-yloxy)hexyl)-2-(hydroxymethyl)piperidine-3,4,5-triol (1c).**

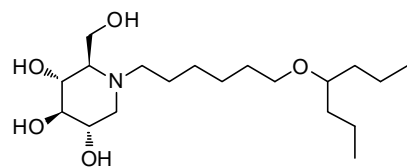

White semi-solid. Yield, 93%.  $^1\text{H NMR}$  (300 MHz,  $\text{CD}_3\text{OD}$ ):  $\delta$  3.86 (d,  $J$  = 2.4 Hz, 2H,  $\text{OCH}_2$ ), 3.53-3.34 (m, 4H, 4 x OCH), 3.27-3.25 (m, 1H, OCH), 3.15 (t,  $J$  = 9.3 Hz, 1H, OCH), 3.04 (dd,  $J$  = 11.4, 5.1 Hz,

1H, NCH), 2.89-2.81 (m, 1H, NCH), 2.69-2.64 (m, 1H, NCH), 2.30-2.20 (m, 2H, 2 x NCH), 1.58-1.31 (m, 16H, 8 x  $\text{CH}_2$ ), 0.94-0.90 (m, 6H, 2 x  $\text{CH}_3$ ). MS: calculated for  $\text{MH}^+$  = 362, found 362.

**(2R,3R,4R,5S)-1-(6-(Cyclohexyloxy)hexyl)-2-(hydroxymethyl)piperidine-3,4,5-triol (2a).**

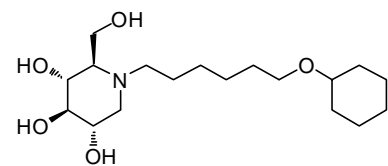

Off-white semi-solid. Yield, 81%.  $^1\text{H NMR}$  (300 MHz,  $\text{CD}_3\text{OD}$ ):  $\delta$  3.86 (d,  $J$  = 2.7 Hz, 2H,  $\text{OCH}_2$ ), 3.52-3.44 (m, 3H, 3 x OCH), 3.36 (t,  $J$  = 9.3 Hz, 1H, OCH), 3.27-3.24 (m, 1H, OCH), 3.14 (t,  $J$  = 9.0 Hz, 1H, OCH),

3.02 (dd,  $J$  = 11.4, 5.1 Hz, 1H, NCH), 2.87-2.79 (m, 1H, NCH), 2.67-2.62 (m, 1H, NCH), 2.27-2.16 (m, 2H, 2 x NCH), 1.91-1.23 (m, 18H). MS: calculated for  $\text{MH}^+$  = 346, found 346.

**(2R,3R,4R,5S)-2-(Hydroxymethyl)-1-(6-((3-**

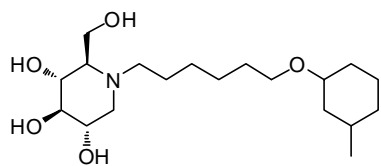

**methylcyclohexyl)oxy)hexyl)piperidine-3,4,5-triol (2b).**

Colorless semi-solid. Yield, 91%.  $^1\text{H NMR}$  (300 MHz,  $\text{CD}_3\text{OD}$ ):  $\delta$  3.86 (s, 2H,  $\text{OCH}_2$ ), 3.57-3.34 (m, 4H, 4 x OCH), 3.26-3.21 (m, 1H, OCH), 3.15 (t,

$J = 9.3$  Hz, 1H, OCH), 3.03 (dd,  $J = 11.4, 5.1$  Hz, 1H, NCH), 2.90-2.80 (m, 1H, NCH), 2.68-2.59 (m, 1H, NCH), 2.29-2.18 (m, 2H, 2 x NCH), 2.01-0.78 (m, 20H). MS: calculated for  $MH^+ = 360$ , found 360.

**(2R,3R,4R,5S)-1-(6-((2-Ethylcyclohexyl)oxy)hexyl)-2-(hydroxymethyl)piperidine-3,4,5-triol (2c).**

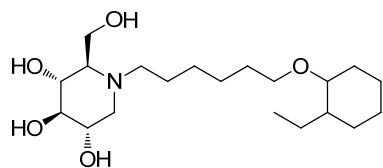

White semi-solid. Yield, 93%.  $^1H$  NMR (300 MHz,  $CD_3OD$ ):  $\delta$  3.85 (d,  $J = 2.4$  Hz, 2H,  $OCH_2$ ), 3.54 (m, 4H, 4 x OCH), 3.28-3.25 (m, 1H, OCH), 3.13 (t,  $J = 9.0$  Hz, 1H, OCH), 3.01 (dd,  $J = 11.4, 4.8$  Hz, 1H,

NCH), 2.88-2.78 (m, 1H, NCH), 2.64-2.62 (m, 1H, NCH), 2.26-2.15 (m, 2H, 2 x NCH), 1.94-1.15 (m, 19H), 0.88 (t,  $J = 7.5$  Hz, 3H,  $CH_3$ ). MS: calculated for  $MH^+ = 374$ , found 374.

**(2R,3R,4R,5S)-1-(6-((4-Ethylcyclohexyl)oxy)hexyl)-2-(hydroxymethyl)piperidine-3,4,5-triol (2d).**

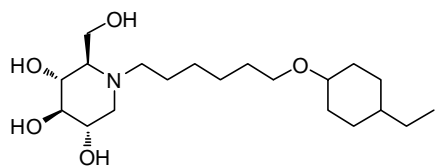

Light-yellow semi-solid. Yield, 61%.  $^1H$  NMR (300 MHz,  $CD_3OD$ ):  $\delta$  3.91-3.84 (m, 2H, 2 x OCH), 3.57-3.39 (m, 4H, 4 x OCH), 3.24-3.12 (m, 3H, 2 x OCH and 1 x NCH), 2.99-2.97 (m, 1H, NCH),

2.81-2.79 (m, 1H, NCH), 2.50-2.42 (m, 2H, 2 x NCH), 2.06-1.10 (m, 19H), 0.91-0.86 (m, 3H,  $CH_3$ ). MS: calculated for  $MH^+ = 374$ , found 374.

**(2R,3R,4R,5S)-2-(Hydroxymethyl)-1-(6-((2-propylcyclohexyl)oxy)hexyl)piperidine-3,4,5-triol (2e).**

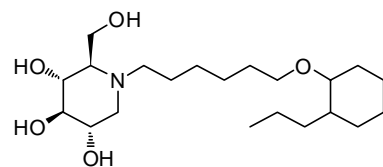

White semi-solid. Yield, 81%.  $^1H$  NMR (300 MHz,  $CD_3OD$ ):  $\delta$  3.86 (d,  $J = 2.7$  Hz, 2H,  $OCH_2$ ), 3.63-3.33 (m, 4H, 4 x OCH), 3.28-3.25 (m, 1H, OCH), 3.13 (t,  $J = 9.0$  Hz, 1H, OCH), 3.02 (dd,  $J = 11.1, 4.8$  Hz, 1H,

NCH), 2.87-2.78 (m, 1H, NCH), 2.63-2.57 (m, 1H, NCH), 2.25-2.14 (m, 2H, 2 x NCH), 1.87-0.95 (m, 21H), 0.90 (t,  $J = 7.5$  Hz, 3H,  $CH_3$ ). MS: calculated for  $MH^+ = 388$ , found 388.

**(2R,3R,4R,5S)-1-(6-((4-Butylcyclohexyl)oxy)hexyl)-2-(hydroxymethyl)piperidine-3,4,5-triol (2f).**

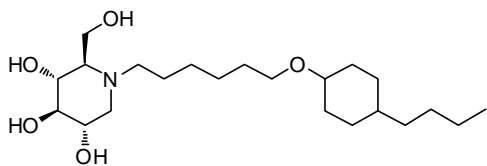

White semi-solid. Yield, 90%.  $^1H$  NMR (300 MHz,  $CD_3OD$ ):  $\delta$  3.87 (d,  $J = 2.4$  Hz, 2H,  $OCH_2$ ), 3.54-3.35 (m, 5H, 5 x OCH), 3.16 (t,  $J = 9.3$  Hz, 1H, OCH), 3.06 (dd,  $J = 11.4, 4.8$  Hz, 1H,



NCH), 2.94-2.84 (m, 1H, NCH), 2.72-2.63 (m, 1H, NCH), 2.34-2.24 (m, 2H, 2 x NCH), 2.04-1.10 (m, 23H), 0.92-0.88 (m, 3H, CH<sub>3</sub>). MS: calculated for MH<sup>+</sup> = 402, found 402.

**(2R,3R,4R,5S)-1-(6-((2,3-Dimethylcyclohexyl)oxy)hexyl)-2-(hydroxymethyl)piperidine-3,4,5-triol**

**(2g).**

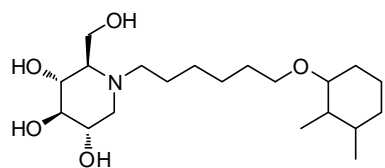

Colorless semi-solid. Yield, 88%. <sup>1</sup>H NMR (300 MHz, CD<sub>3</sub>OD): δ 3.86

(s, 2H, OCH<sub>2</sub>), 3.54-3.44 (m, 2H, 2 x OCH), 3.40-3.35 (m, 2H, 2 x OCH), 3.30-3.11 (m, 2H, 2 x OCH, overlapped with the peaks of

CH<sub>3</sub>OH), 3.02 (dd, *J* = 11.4, 5.1 Hz, 1H, NCH), 2.90-2.80 (m, 1H, NCH), 2.69-2.59 (m, 1H, NCH), 2.28-2.18 (m, 2H, 2 x NCH), 1.76-1.07 (m, 16H), 0.93-0.74 (m, 6H, 2 x CH<sub>3</sub>). MS: calculated for MH<sup>+</sup> = 374, found 374.

**(2R,3R,4R,5S)-1-(6-((3,4-Dimethylcyclohexyl)oxy)hexyl)-2-(hydroxymethyl)piperidine-3,4,5-triol**

**(2h).**

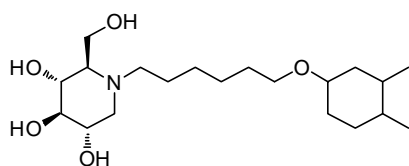

White semi-solid. Yield, 87%. <sup>1</sup>H NMR (300 MHz, CD<sub>3</sub>OD): δ 3.86

(d, *J* = 2.4 Hz, 2H, OCH<sub>2</sub>), 3.51-3.40 (m, 3H, 3 x OCH), 3.37 (t, *J* = 9.3 Hz, 1H, OCH), 3.29-3.23 (m, 1H, OCH), 3.14 (t, *J* = 9.3 Hz, 1H,

OCH), 3.03 (dd, *J* = 11.4, 5.1 Hz, 1H, NCH), 2.86-2.83 (m, 1H, NCH), 2.66-2.63 (m, 1H, NCH), 2.29-2.19 (m, 2H, 2 x NCH), 1.76-1.25 (m, 16H), 0.91-0.82 (m, 6H, 2 x CH<sub>3</sub>). MS: calculated for MH<sup>+</sup> = 374, found 374.

**(2R,3R,4R,5S)-2-(Hydroxymethyl)-1-(6-((3,3,5-trimethylcyclohexyl)oxy)hexyl)piperidine-3,4,5-triol (2i).**

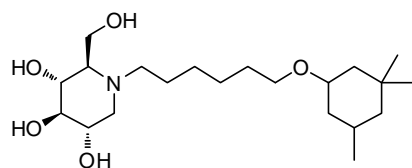

Light-yellow semi-solid. Yield, 92%. <sup>1</sup>H NMR (300 MHz, CD<sub>3</sub>OD): δ

3.86 (d, *J* = 2.7 Hz, 2H, OCH<sub>2</sub>), 3.61-3.34 (m, 5H, 5 x OCH), 3.15 (t, *J* = 9.3 Hz, 1H, OCH), 3.04 (dd, *J* = 11.1, 4.8 Hz, 1H, NCH), 2.91-

2.81 (m, 1H, NCH), 2.70-2.60 (m, 1H, NCH), 2.31-2.20 (m, 2H, 2 x NCH), 1.87-1.05 (m, 15H), 0.94-0.88 (m, 9H, 3 x CH<sub>3</sub>). MS: calculated for MH<sup>+</sup> = 388, found 388.

**(2R,3R,4R,5S)-1-(6-([1,1'-Bi(cyclohexan)]-2-yloxy)hexyl)-2-(hydroxymethyl)piperidine-3,4,5-triol**

**(2j).**

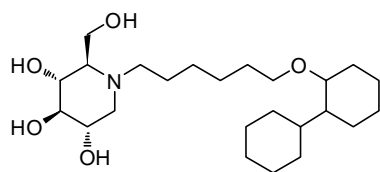

Colorless semi-solid. Yield, 86%. <sup>1</sup>H NMR (300 MHz, CD<sub>3</sub>OD): δ 3.86

(s, 2H, OCH<sub>2</sub>), 3.66-3.61 (m, 1H, OCH), 3.53-3.45 (m, 1H, OCH), 3.38

(t, *J* = 9.3 Hz, 1H, OCH), 3.15 (t, *J* = 9.3 Hz, 1H, OCH), 3.08-3.01 (m,

2H), 2.87-2.82 (m, 1H, NCH), 2.67-2.65 (m, 1H, NCH), 2.30-2.11 (m, 3H), 1.77-1.01 (m, 28H). MS: calculated for MH<sup>+</sup> = 428, found 428.

**(2R,3R,4R,5S)-1-(6-(Cyclopentyloxy)hexyl)-2-(hydroxymethyl)piperidine-3,4,5-triol (2k).**

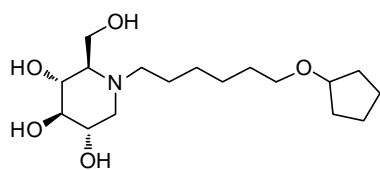

White semi-solid. Yield, 83%. <sup>1</sup>H NMR (300 MHz, CD<sub>3</sub>OD): δ 3.90-

3.86 (m, 3H, 3 x OCH), 3.53-3.35 (m, 4H, 4 x OCH), 3.15 (t, *J* = 9.0 Hz,

1H, OCH), 3.04 (dd, *J* = 11.7, 5.1 Hz, 1H, NCH), 2.90-2.82 (m, 1H,

NCH), 2.70-2.63 (m, 1H, NCH), 2.31-2.22 (m, 2H, 2 x NCH), 1.74-1.31 (m, 16H). MS: calculated for MH<sup>+</sup> = 332, found 332.

**(2R,3R,4R,5S)-1-(6-(Cycloheptyloxy)hexyl)-2-(hydroxymethyl)piperidine-3,4,5-triol (2l).**

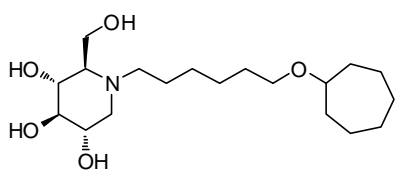

White semi-solid. Yield, 93%. [ $\alpha$ ]<sub>D</sub> = - 4 (c = 2.0, methanol). <sup>1</sup>H NMR

(300 MHz, CD<sub>3</sub>OD): δ 3.86 (d, *J* = 2.7 Hz, 2H, OCH<sub>2</sub>), 3.53-3.34 (m,

5H, 5 x OCH), 3.14 (t, *J* = 9.3 Hz, 1H, OCH), 3.04 (dd, *J* = 11.4, 4.8

Hz, 1H, NCH), 2.89-2.81 (m, 1H, NCH), 2.69-2.64 (m, 1H, NCH), 2.30-2.19 (m, 2H, 2 x NCH), 1.94-1.29 (m, 20H). MS: calculated for MH<sup>+</sup> = 360, found 360.

### c. Synthesis of DNJ Derivatives 3.

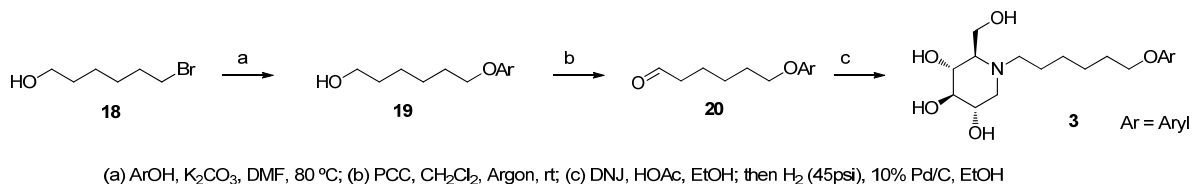

*c.a. General Procedure for the Preparation of Alcohols 21.* To a stirring solution of the substituted phenol **20** (1.5 mmol) and 6-bromo-1-hexanol (**19**, 0.14 mL, 1 mmol) in DMF (3 mL), was added potassium carbonate (207 mg, 1.5 mmol). The reaction mixture was stirred at 80 °C for 4 hours. After cooling to room temperature, the reaction was quenched with water (30 mL), and extracted with ethyl acetate (20 mL x 3). The combined organic layer was washed with brine (30 mL), dried over sodium sulfate, and then concentrated under reduced pressure. The resulting residue was purified through silica gel column chromatography (ethyl acetate : hexanes = 5 : 95 to 20 : 80) to afford the pure compound **21**.

*c.b. General Procedure for the Preparation of Aldehydes 22.* To a stirring suspension of PCC (363 mg, 1.68 mmol) and silica gel (363 mg) in dry dichloromethane (10 mL), was added a solution of the alcohol **21** (1.40 mmol) in dichloromethane (5 mL). The reaction mixture was stirred at room temperature under argon atmosphere for 4 hours. Then, it was filtered through a silica gel pad, and washed with ethyl acetate (20 mL). The filtrate was concentrated and then purified through silica gel column chromatography (ethyl acetate : hexanes = 0 : 100 to 10 : 90) to afford the pure compound **22**.

*c.c. General Procedure for the Synthesis of DNJ Derivatives 3.* A solution of DNJ (49 mg, 0.3 mmol) in acetic acid (1 mL) was stirred at room temperature overnight, and then the solvent was removed under reduced pressure. The resulting residue was treated with 200 proof ethanol (5 mL) and the aldehyde **22** (0.39 mmol), followed by acetic acid (2 drops as catalyst). The reaction mixture was stirred at room temperature under argon atmosphere for another hour. Then, it was transferred to the hydrogenation bottle, followed by addition of 10% Pd/C (30 mg) and 200 proof ethanol (5 mL). The mixture was hydrogenated under 45 psi of H<sub>2</sub> for 24 hours. After the reaction was complete, it was treated with celite

(100 mg), and then filtered through a silica gel pad. The filtrate was concentrated and purified through silica gel column chromatography (methanol : ethyl acetate = 5 : 95 to 20 : 80) to afford the pure compound **3**.

**(2R,3R,4R,5S)-2-(Hydroxymethyl)-1-(6-phenoxyhexyl)piperidine-3,4,5-triol (3a).**

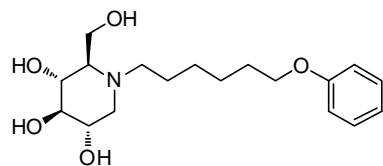

White solid. Yield, 89%. <sup>1</sup>H NMR (300 MHz, CD<sub>3</sub>OD): δ 7.26-7.21 (m, 2H, CH<sub>ar</sub>), 6.90-6.85 (m, 3H, CH<sub>ar</sub>), 3.96 (t, *J* = 6.6 Hz, 2H, ArOCH<sub>2</sub>), 3.85 (t, *J* = 2.7 Hz, 2H, OCH<sub>2</sub>), 3.51-3.43 (m, 1H, OCH), 3.35 (t, *J* = 9.3

Hz, 1H, OCH), 3.13 (t, *J* = 9.3 Hz, 1H, OCH), 3.01 (dd, *J* = 11.1, 4.8 Hz, 1H, NCH), 2.86-2.79 (m, 1H, NCH), 2.66-2.61 (m, 1H, NCH), 2.24-2.12 (m, 2H, 2 x NCH), 1.82-1.75 (m, 2H, CH<sub>2</sub>), 1.57-1.47 (m, 4H, 2 x CH<sub>2</sub>), 1.41-1.32 (m, 2H, CH<sub>2</sub>). MS: calculated for MH<sup>+</sup> = 340, found 340.

**(2R,3R,4R,5S)-2-(Hydroxymethyl)-1-(6-(*o*-tolylloxy)hexyl)piperidine-3,4,5-triol (3b).**

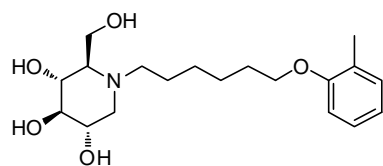

White solid. Yield, 35%. <sup>1</sup>H NMR (300 MHz, CD<sub>3</sub>OD): δ 7.11-7.06 (m, 2H, CH<sub>ar</sub>), 6.85-6.76 (m, 2H, CH<sub>ar</sub>), 3.95 (t, *J* = 6.6 Hz, 2H, ArOCH<sub>2</sub>), 3.85 (t, *J* = 3.0 Hz, 2H, OCH<sub>2</sub>), 3.49-3.42 (m, 1H, OCH), 3.34 (t, *J* = 9.3

Hz, 1H, OCH), 3.12 (t, *J* = 9.0 Hz, 1H, OCH), 2.99 (dd, *J* = 11.1, 4.8 Hz, 1H, NCH), 2.82-2.80 (m, 1H, NCH), 2.62-2.59 (m, 1H, NCH), 2.21-2.09 (m, 5H, 2 x NCH and ArCH<sub>3</sub> overlapped), 1.83-1.76 (m, 2H, CH<sub>2</sub>), 1.59-1.49 (m, 4H, 2 x CH<sub>2</sub>), 1.42-1.34 (m, 2H, CH<sub>2</sub>). MS: calculated for MH<sup>+</sup> = 354, found 354.

**(2R,3R,4R,5S)-2-(Hydroxymethyl)-1-(6-(*m*-tolylloxy)hexyl)piperidine-3,4,5-triol (3c).**

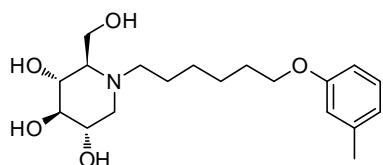

White semi-solid. Yield, 98%. <sup>1</sup>H NMR (300 MHz, CD<sub>3</sub>OD): δ 7.13-7.08 (m, 1H, CH<sub>ar</sub>), 6.73-6.66 (m, 3H, CH<sub>ar</sub>), 3.94 (t, *J* = 6.3 Hz, 2H, ArOCH<sub>2</sub>), 3.86 (d, *J* = 2.7 Hz, 2H, OCH<sub>2</sub>), 3.52-3.44 (m, 1H, OCH),

3.36 (t, *J* = 9.6 Hz, 1H, OCH), 3.14 (t, *J* = 9.3 Hz, 1H, OCH), 3.02 (dd, *J* = 11.4, 5.1 Hz, 1H, NCH), 2.86-2.80 (m, 1H, NCH), 2.68-2.63 (m, 1H, NCH), 2.28 (s, 3H, ArCH<sub>3</sub>), 2.27-2.15 (m, 2H, 2 x NCH),

1.79-1.72 (m, 2H, CH<sub>2</sub>), 1.57-1.46 (m, 4H, 2 x CH<sub>2</sub>), 1.41-1.33 (m, 2H, CH<sub>2</sub>). MS: calculated for MH<sup>+</sup> = 354, found 354.

**(2R,3R,4R,5S)-2-(Hydroxymethyl)-1-(6-(*m*-tolylloxy)hexyl)piperidine-3,4,5-triol Hydrochloride**

**(3d).**

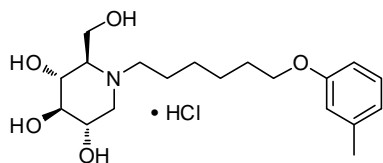

The product was obtained as white semi-solid by the treatment of **3c** with conc. hydrochloric acid. Yield 95%. <sup>1</sup>H NMR (300 MHz, CD<sub>3</sub>OD): δ 7.14-7.08 (m, 1H, CH<sub>ar</sub>), 6.73-6.66 (m, 3H, CH<sub>ar</sub>), 4.12 (d, *J* = 12.3 Hz,

1H), 3.98-3.87 (m, 3H), 3.73-3.56 (m, 2H), 3.48-3.33 (m, 3H), 3.25-3.15 (m, 1H), 3.06-2.95 (m, 2H), 2.28 (s, 3H, ArCH<sub>3</sub>), 1.83-1.72 (m, 4H, 2 x CH<sub>2</sub>), 1.63-1.48 (m, 4H, 2 x CH<sub>2</sub>). MS: calculated for MH<sup>+</sup> = 354, found 354.

**(2R,3R,4R,5S)-2-(Hydroxymethyl)-1-(6-(5-isopropyl-2-methylphenoxy)hexyl)piperidine-3,4,5-triol**

**(3e).**

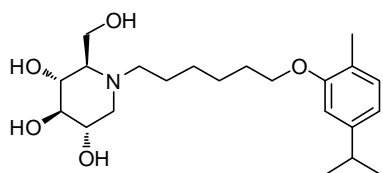

White semi-solid. Yield, 86%. <sup>1</sup>H NMR (300 MHz, CD<sub>3</sub>OD): δ 6.98 (d, *J* = 7.8 Hz, 1H, CH<sub>ar</sub>), 6.71-6.65 (m, 2H, CH<sub>ar</sub>), 3.96 (t, *J* = 6.6 Hz, 2H, ArOCH<sub>2</sub>), 3.85 (t, *J* = 3.0 Hz, 2H, OCH<sub>2</sub>), 3.51-3.43 (m, 1H, OCH), 3.34

(t, *J* = 9.3 Hz, 1H, OCH), 3.12 (t, *J* = 9.0 Hz, 1H, OCH), 2.99 (dd, *J* = 11.1, 4.8 Hz, 1H, NCH), 2.87-2.77 (m, 2H, NCH and ArCH overlapped), 2.64-2.59 (m, 1H, NCH), 2.21-2.09 (m, 5H, 2 x NCH and ArCH<sub>3</sub> overlapped), 1.83-1.76 (m, 2H, CH<sub>2</sub>), 1.60-1.49 (m, 4H, 2 x CH<sub>2</sub>), 1.42-1.34 (m, 2H, CH<sub>2</sub>), 1.21 (d, *J* = 6.9 Hz, 6H, C(CH<sub>3</sub>)<sub>2</sub>). MS: calculated for MH<sup>+</sup> = 396, found 396.

**(2R,3R,4R,5S)-2-(Hydroxymethyl)-1-(6-(2-isopropyl-5-methylphenoxy)hexyl)piperidine-3,4,5-triol**

**(3f).**

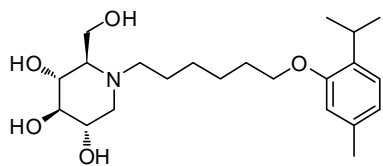

White solid. Yield, 95%. <sup>1</sup>H NMR (300 MHz, CD<sub>3</sub>OD): δ 7.02 (d, *J* = 7.5 Hz, 1H, CH<sub>ar</sub>), 6.68-6.66 (m, 2H, CH<sub>ar</sub>), 3.95 (t, *J* = 6.6 Hz, 2H, ArOCH<sub>2</sub>), 3.85 (t, *J* = 3.3 Hz, 2H, OCH<sub>2</sub>), 3.50-3.42 (m, 1H, OCH), 3.34

(t,  $J = 9.0$  Hz, 1H, OCH), 3.27-3.20 (m, 1H, ArCH), 3.12 (t,  $J = 9.0$  Hz, 1H, OCH), 2.99 (dd,  $J = 11.1$ , 4.5 Hz, 1H, NCH), 2.86-2.76 (m, 1H, NCH), 2.63-2.54 (m, 1H, NCH), 2.27 (s, 3H, ArCH<sub>3</sub>), 2.20-2.08 (m, 2H, 2 x NCH), 1.85-1.76 (m, 2H, CH<sub>2</sub>), 1.60-1.49 (m, 4H, 2 x CH<sub>2</sub>), 1.42-1.34 (m, 2H, CH<sub>2</sub>), 1.17 (d,  $J = 6.9$  Hz, 6H, C(CH<sub>3</sub>)<sub>2</sub>). MS: calculated for MH<sup>+</sup> = 396, found 396.

**(2R,3R,4R,5S)-1-(6-(2-(tert-Butyl)-5-methylphenoxy)hexyl)-2-(hydroxymethyl)piperidine-3,4,5-triol (3g).**

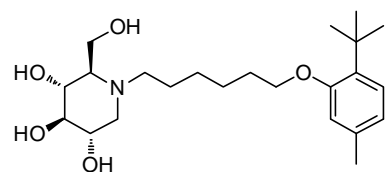

White solid. Yield, 77%. <sup>1</sup>H NMR (300 MHz, CD<sub>3</sub>OD):  $\delta$  7.08 (d,  $J = 7.8$  Hz, 1H, CH<sub>ar</sub>), 6.71 (s, 1H, CH<sub>ar</sub>), 6.63 (dd,  $J = 7.8$ , 1.2 Hz, 1H, CH<sub>ar</sub>), 3.97 (t,  $J = 6.6$  Hz, 2H, ArOCH<sub>2</sub>), 3.85 (t,  $J = 2.4$  Hz, 2H, OCH<sub>2</sub>),

3.51-3.43 (m, 1H, OCH), 3.35 (t,  $J = 9.0$  Hz, 1H, OCH), 3.13 (t,  $J = 9.0$  Hz, 1H, OCH), 3.01 (dd,  $J = 11.1$ , 5.1 Hz, 1H, NCH), 2.86-2.79 (m, 1H, NCH), 2.66-2.56 (m, 1H, NCH), 2.26 (s, 3H, ArCH<sub>3</sub>), 2.23-2.11 (m, 2H, 2 x NCH), 1.90-1.81 (m, 2H, CH<sub>2</sub>), 1.64-1.51 (m, 4H, 2 x CH<sub>2</sub>), 1.44-1.36 (m, 2H, CH<sub>2</sub>), 1.35 (s, 9H, C(CH<sub>3</sub>)<sub>3</sub>). MS: calculated for MH<sup>+</sup> = 410, found 410.

**(2R,3R,4R,5S)-1-(6-(2,5-Dichlorophenoxy)hexyl)-2-(hydroxymethyl)piperidine-3,4,5-triol (3h).**

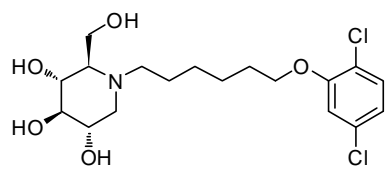

This compound was synthesized using sodium cyanoborohydride method (See the synthesis of **5a**). White solid. Yield, 90%. <sup>1</sup>H NMR (300 MHz, CD<sub>3</sub>OD):  $\delta$  7.32 (d,  $J = 8.7$  Hz, 1H, CH<sub>ar</sub>), 7.07 (d,  $J = 1.8$  Hz, 1H, CH<sub>ar</sub>), 6.91 (dd,  $J = 8.4$ , 2.1 Hz, 1H, CH<sub>ar</sub>), 4.05 (t,  $J = 6.3$  Hz, 2H, ArOCH<sub>2</sub>), 3.91 (m, 2H, OCH<sub>2</sub>), 3.60-

3.51 (m, 1H, OCH), 3.45 (t,  $J = 9.3$  Hz, 1H, OCH), 3.25-3.14 (m, 2H, OCH and NCH overlapped), 3.06-2.98 (m, 1H, NCH), 2.88-2.80 (m, 1H, NCH), 2.52-2.45 (m, 2H, 2 x NCH), 1.89-1.40 (m, 8H, 4 x CH<sub>2</sub>). MS: calculated for MH<sup>+</sup> = 408, found 408.

**(2R,3R,4R,5S)-1-(6-(2-Fluorophenoxy)hexyl)-2-(hydroxymethyl)piperidine-3,4,5-triol (3i).**

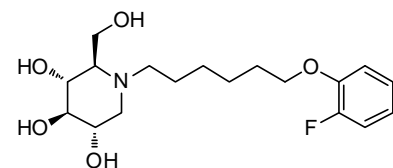

White solid. Yield, 96%. <sup>1</sup>H NMR (300 MHz, CD<sub>3</sub>OD):  $\delta$  7.08-7.02 (m, 3H, CH<sub>ar</sub>), 6.91-6.83 (m, 1H, CH<sub>ar</sub>), 4.01 (t,  $J = 6.6$  Hz, 2H, ArOCH<sub>2</sub>),

3.86 (d,  $J = 2.4$  Hz, 2H, OCH<sub>2</sub>), 3.53-3.45 (m, 1H, OCH), 3.37 (t,  $J = 9.3$  Hz, 1H, OCH), 3.15 (t,  $J = 9.3$  Hz, 1H, OCH), 3.02 (dd,  $J = 11.4, 5.1$  Hz, 1H, NCH), 2.89-2.79 (m, 1H, NCH), 2.68-2.58 (m, 1H, NCH), 2.27-2.16 (m, 2H, 2 x NCH), 1.83-1.36 (m, 8H, 4 x CH<sub>2</sub>). calculated for MS: MH<sup>+</sup> = 358, found 358.

**(2R,3R,4R,5S)-1-(6-(3-Fluorophenoxy)hexyl)-2-(hydroxymethyl)piperidine-3,4,5-triol (3j).**

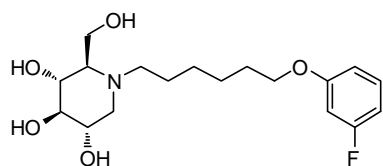

White semi-solid. Yield, 96%.  $[\alpha]_D = -6$  ( $c = 1.5$ , methanol). <sup>1</sup>H NMR (300 MHz, CD<sub>3</sub>OD):  $\delta$  7.23-7.18 (m, 1H, CH<sub>ar</sub>), 6.71-6.60 (m, 3H, CH<sub>ar</sub>), 3.94 (t,  $J = 6.3$  Hz, 2H, ArOCH<sub>2</sub>), 3.85 (s, 2H, OCH<sub>2</sub>), 3.52-3.44

(m, 1H, OCH), 3.36 (t,  $J = 9.3$  Hz, 1H, OCH), 3.13 (t,  $J = 9.3$  Hz, 1H, OCH), 3.00 (dd,  $J = 11.1, 5.1$  Hz, 1H, NCH), 2.84-2.77 (m, 1H, NCH), 2.65-2.60 (m, 1H, NCH), 2.23-2.12 (m, 2H, 2 x NCH), 1.79-1.35 (m, 8H, 4 x CH<sub>2</sub>). MS: calculated for MH<sup>+</sup> = 358, found 358.

**(2R,3R,4R,5S)-1-(6-(4-Fluorophenoxy)hexyl)-2-(hydroxymethyl)piperidine-3,4,5-triol (3k).**

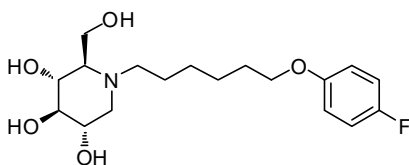

White semi-solid. Yield, 96%. <sup>1</sup>H NMR (300 MHz, CD<sub>3</sub>OD):  $\delta$  7.00-6.93 (m, 2H, CH<sub>ar</sub>), 6.90-6.84 (m, 2H, CH<sub>ar</sub>), 3.93 (t,  $J = 6.6$  Hz, 2H, ArOCH<sub>2</sub>), 3.86 (d,  $J = 2.7$  Hz, 2H, OCH<sub>2</sub>), 3.53-3.45 (m, 1H, OCH),

3.37 (t,  $J = 9.6$  Hz, 1H, OCH), 3.14 (t,  $J = 9.0$  Hz, 1H, OCH), 3.02 (dd,  $J = 11.1, 5.1$  Hz, 1H, NCH), 2.88-2.80 (m, 1H, NCH), 2.68-2.60 (m, 1H, NCH), 2.27-2.16 (m, 2H, 2 x NCH), 1.81-1.33 (m, 8H, 4 x CH<sub>2</sub>). MS: calculated for MH<sup>+</sup> = 358, found 358.

**(2R,3R,4R,5S)-1-(6-(2,5-Difluorophenoxy)hexyl)-2-(hydroxymethyl)piperidine-3,4,5-triol (3l).**

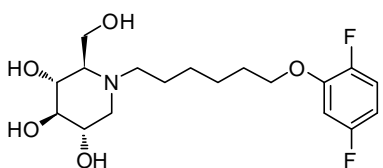

White semi-solid. Yield, 89%.  $[\alpha]_D = -5$  ( $c = 2.1$ , methanol). <sup>1</sup>H NMR (300 MHz, CD<sub>3</sub>OD):  $\delta$  7.09-7.01 (m, 1H, CH<sub>ar</sub>), 6.90-6.84 (m, 1H, CH<sub>ar</sub>), 6.64-6.56 (m, 1H, CH<sub>ar</sub>), 4.03 (t,  $J = 6.3$  Hz, 2H, ArOCH<sub>2</sub>), 3.87

(d,  $J = 2.7$  Hz, 2H, OCH<sub>2</sub>), 3.53-3.45 (m, 1H, OCH), 3.37 (t,  $J = 9.3$  Hz, 1H, OCH), 3.15 (t,  $J = 9.3$  Hz, 1H, OCH), 3.05 (dd,  $J = 11.4, 5.1$  Hz, 1H, NCH), 2.93-2.83 (m, 1H, NCH), 2.71-2.61 (m, 1H, NCH),

2.31-2.20 (m, 2H, 2 x NCH), 1.86-1.77 (m, 2H, CH<sub>2</sub>), 1.62-1.49 (m, 4H, 2 x CH<sub>2</sub>), 1.43-1.33 (m, 2H, CH<sub>2</sub>). MS: calculated for MH<sup>+</sup> = 376, found 376.

**(2R,3R,4R,5S)-2-(Hydroxymethyl)-1-(6-(2,4,6-trifluorophenoxy)hexyl)piperidine-3,4,5-triol (3m).**

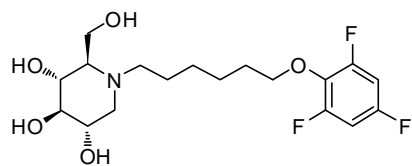

Light-yellow semi-solid. Yield, 71%. <sup>1</sup>H NMR (300 MHz, CD<sub>3</sub>OD): δ 6.91-6.85 (m, 2H, CH<sub>ar</sub>), 4.06 (t, *J* = 6.6 Hz, 2H, ArOCH<sub>2</sub>), 3.86 (s, 2H, OCH<sub>2</sub>), 3.52-3.44 (m, 1H, OCH), 3.36 (t, *J* = 9.3 Hz, 1H, OCH),

3.13 (t, *J* = 9.0 Hz, 1H, OCH), 3.00 (dd, *J* = 11.1, 5.1 Hz, 1H, NCH), 2.85-2.77 (m, 1H, NCH), 2.65-2.60 (m, 1H, NCH), 2.23-2.12 (m, 2H, 2 x NCH), 1.79-1.32 (m, 8H, 4 x CH<sub>2</sub>). MS: calculated for MH<sup>+</sup> = 394, found 394.

**(2R,3R,4R,5S)-2-(Hydroxymethyl)-1-(6-(perfluorophenoxy)hexyl)piperidine-3,4,5-triol (3n).**

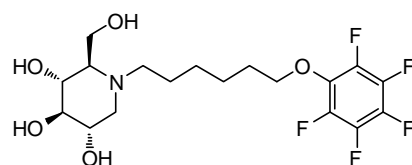

White semi-solid. Yield, 74%. <sup>1</sup>H NMR (300 MHz, CD<sub>3</sub>OD): δ 4.19 (t, *J* = 6.6 Hz, 2H, ArOCH<sub>2</sub>), 3.87 (d, *J* = 2.4 Hz, 2H, OCH<sub>2</sub>), 3.53-3.45 (m, 1H, OCH), 3.37 (t, *J* = 9.6 Hz, 1H, OCH), 3.15 (t, *J* = 9.3 Hz,

1H, OCH), 3.04 (dd, *J* = 11.4, 5.1 Hz, 1H, NCH), 2.90-2.82 (m, 1H, NCH), 2.70-2.63 (m, 1H, NCH), 2.29-2.18 (m, 2H, 2 x NCH), 1.83-1.35 (m, 8H, 4 x CH<sub>2</sub>). MS: calculated for MH<sup>+</sup> = 430, found 430.

**(2R,3R,4R,5S)-2-(Hydroxymethyl)-1-(6-(2-(trifluoromethyl)phenoxy)hexyl)piperidine-3,4,5-triol (3o).**

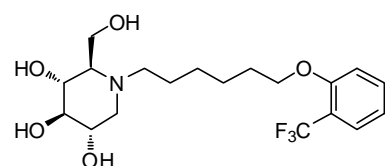

White semi-solid. Yield, 93%. <sup>1</sup>H NMR (300 MHz, CD<sub>3</sub>OD): δ 7.55 (m, 2H, CH<sub>ar</sub>), 7.12 (d, *J* = 8.7 Hz, 1H, CH<sub>ar</sub>), 7.01 (t, *J* = 7.8 Hz, 1H, CH<sub>ar</sub>), 4.07 (t, *J* = 6.3 Hz, 2H, ArOCH<sub>2</sub>), 3.88 (s, 2H, OCH<sub>2</sub>), 3.56-3.48 (m, 1H,

OCH), 3.41 (t, *J* = 9.6 Hz, 1H, OCH), 3.18 (t, *J* = 9.3 Hz, 1H, OCH), 3.09 (dd, *J* = 11.4, 5.1 Hz, 1H, NCH), 2.97-2.87 (m, 1H, NCH), 2.76-2.67 (m, 1H, NCH), 2.38-2.29 (m, 2H, 2 x NCH), 1.93-1.38 (m, 8H, 4 x CH<sub>2</sub>). MS: calculated for MH<sup>+</sup> = 408, found 408.



**(2R,3R,4R,5S)-2-(Hydroxymethyl)-1-(6-(3-(trifluoromethyl)phenoxy)hexyl)piperidine-3,4,5-triol**

**(3p).**

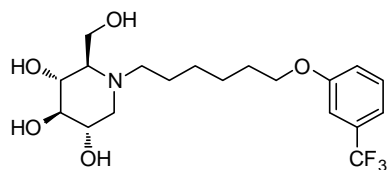

White semi-solid. Yield, 94%.  $^1\text{H NMR}$  (300 MHz,  $\text{CD}_3\text{OD}$ ):  $\delta$  7.44 (t,  $J = 7.8$  Hz, 1H,  $\text{CH}_{\text{ar}}$ ), 7.21-7.14 (m, 3H,  $\text{CH}_{\text{ar}}$ ), 4.02 (t,  $J = 6.6$  Hz, 2H,  $\text{ArOCH}_2$ ), 3.87 (d,  $J = 2.4$  Hz, 2H,  $\text{OCH}_2$ ), 3.54-3.46 (m, 1H, OCH),

3.38 (t,  $J = 9.3$  Hz, 1H, OCH), 3.15 (t,  $J = 9.3$  Hz, 1H, OCH), 3.05 (dd,  $J = 11.7, 5.1$  Hz, 1H, NCH), 2.91-2.83 (m, 1H, NCH), 2.71-2.66 (m, 1H, NCH), 2.30-2.20 (m, 2H, 2 x NCH), 1.86-1.35 (m, 8H, 4 x  $\text{CH}_2$ ). MS: calculated for  $\text{MH}^+ = 408$ , found 408.

**(2R,3R,4R,5S)-2-(Hydroxymethyl)-1-(6-(4-(trifluoromethyl)phenoxy)hexyl)piperidine-3,4,5-triol**

**(3q).**

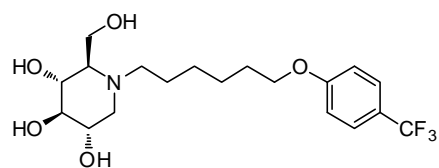

White semi-solid. Yield, 96%.  $^1\text{H NMR}$  (300 MHz,  $\text{CD}_3\text{OD}$ ):  $\delta$  7.55 (d,  $J = 8.4$  Hz, 2H,  $\text{CH}_{\text{ar}}$ ), 7.04 (d,  $J = 8.4$  Hz, 2H,  $\text{CH}_{\text{ar}}$ ), 4.04 (t,  $J = 6.3$  Hz, 2H,  $\text{ArOCH}_2$ ), 3.88 (s, 2H,  $\text{OCH}_2$ ), 3.55-3.47 (m, 1H, OCH),

3.39 (t,  $J = 9.6$  Hz, 1H, OCH), 3.16 (t,  $J = 9.3$  Hz, 1H, OCH), 3.07 (dd,  $J = 11.1, 4.8$  Hz, 1H, NCH), 2.91-2.86 (m, 1H, NCH), 2.74-2.69 (m, 1H, NCH), 2.34-2.25 (m, 2H, 2 x NCH), 1.86-1.38 (m, 8H, 4 x  $\text{CH}_2$ ). MS: calculated for  $\text{MH}^+ = 408$ , found 408.

**(2R,3R,4R,5S)-2-(Hydroxymethyl)-1-(6-(4-(trifluoromethoxy)phenoxy)hexyl) piperidine-3,4,5-triol**

**(3r).**

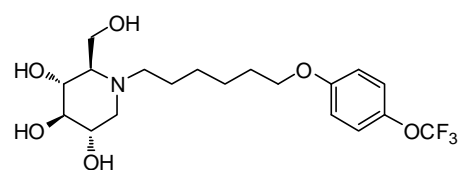

White semi-solid. Yield, 94%.  $^1\text{H NMR}$  (300 MHz,  $\text{CD}_3\text{OD}$ ):  $\delta$  7.16 (d,  $J = 8.4$  Hz, 2H,  $\text{CH}_{\text{ar}}$ ), 6.98-6.93 (m, 2H,  $\text{CH}_{\text{ar}}$ ), 3.98 (t,  $J = 6.6$  Hz, 2H,  $\text{ArOCH}_2$ ), 3.87 (d,  $J = 2.4$  Hz, 2H,  $\text{OCH}_2$ ), 3.54-3.46

(m, 1H, OCH), 3.38 (t,  $J = 9.6$  Hz, 1H, OCH), 3.16 (t,  $J = 9.3$  Hz, 1H, OCH), 3.06 (dd,  $J = 11.4, 4.8$  Hz, 1H, NCH), 2.93-2.85 (m, 1H, NCH), 2.73-2.65 (m, 1H, NCH), 2.33-2.24 (m, 2H, 2 x NCH), 1.84-1.35 (m, 8H, 4 x  $\text{CH}_2$ ). MS: calculated for  $\text{MH}^+ = 424$ , found 424.

**(2R,3R,4R,5S)-2-(Hydroxymethyl)-1-(6-(2-methoxyphenoxy)hexyl)piperidine-3,4,5-triol (3s).**

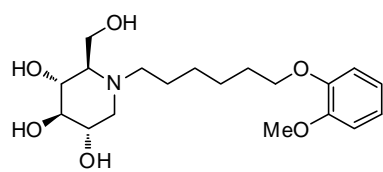

White solid. Yield, 85%.  $^1\text{H}$  NMR (300 MHz,  $\text{CD}_3\text{OD}$ ):  $\delta$  6.81 (s, 4H,  $\text{CH}_{\text{ar}}$ ), 3.91-3.86 (m, 4H, 2 x  $\text{OCH}_2$ ), 3.72 (s, 3H,  $\text{OCH}_3$ ), 3.53-3.45 (m, 1H, OCH), 3.37 (t,  $J = 9.6$  Hz, 1H, OCH), 3.15 (t,  $J = 9.3$  Hz, 1H, OCH), 3.03 (dd,  $J = 11.1, 4.8$  Hz, 1H, NCH), 2.88-2.80 (m, 1H, NCH), 2.68-2.61 (m, 1H, NCH), 2.28-2.18 (m, 2H, 2 x NCH), 1.78-1.31 (m, 8H, 4 x  $\text{CH}_2$ ). MS: calculated for  $\text{MH}^+ = 370$ , found 370.

**(2R,3R,4R,5S)-2-(Hydroxymethyl)-1-(6-(4-methoxyphenoxy)hexyl)piperidine-3,4,5-triol (3t).**

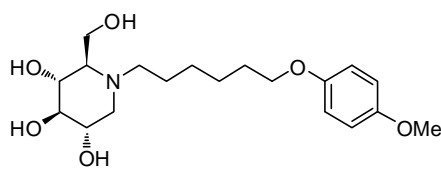

White solid. Yield, 93%.  $^1\text{H}$  NMR (300 MHz,  $\text{CD}_3\text{OD}$ ):  $\delta$  6.95-6.85 (m, 4H,  $\text{CH}_{\text{ar}}$ ), 3.97 (t,  $J = 6.6$  Hz, 2H,  $\text{ArOCH}_2$ ), 3.85 (t,  $J = 2.4$  Hz, 2H,  $\text{OCH}_2$ ), 3.81 (s, 3H,  $\text{OCH}_3$ ), 3.51-3.43 (m, 1H, OCH), 3.35 (t,  $J = 9.0$  Hz, 1H, OCH), 3.13 (t,  $J = 9.0$  Hz, 1H, OCH), 2.99 (dd,  $J = 11.1, 4.8$  Hz, 1H, NCH), 2.84-2.76 (m, 1H, NCH), 2.64-2.57 (m, 1H, NCH), 2.22-2.09 (m, 2H, 2 x NCH), 1.83-1.32 (m, 8H, 4 x  $\text{CH}_2$ ). MS: calculated for  $\text{MH}^+ = 370$ , found 370.

**(2R,3R,4R,5S)-2-(Hydroxymethyl)-1-(6-(pyridin-3-yloxy)hexyl)piperidine-3,4,5-triol (3u).**

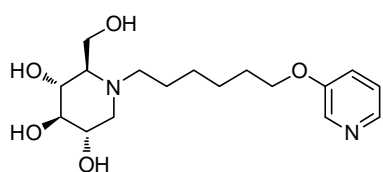

Colorless semi-solid. Yield, 47%.  $^1\text{H}$  NMR (300 MHz,  $\text{CD}_3\text{OD}$ ):  $\delta$  8.21 (d,  $J = 2.1$  Hz, 1H,  $\text{CH}_{\text{ar}}$ ), 8.10 (d,  $J = 3.6$  Hz, 1H,  $\text{CH}_{\text{ar}}$ ), 7.42-7.32 (m, 2H,  $\text{CH}_{\text{ar}}$ ), 4.05 (t,  $J = 6.3$  Hz, 2H,  $\text{ArOCH}_2$ ), 3.86 (d,  $J = 2.7$  Hz, 2H,  $\text{OCH}_2$ ), 3.53-3.45 (m, 1H, OCH), 3.37 (t,  $J = 9.3$  Hz, 1H, OCH), 3.15 (t,  $J = 9.3$  Hz, 1H, OCH), 3.03 (dd,  $J = 11.1, 4.5$  Hz, 1H, NCH), 2.89-2.82 (m, 1H, NCH), 2.69-2.62 (m, 1H, NCH), 2.28-2.19 (m, 2H, 2 x NCH), 1.86-1.34 (m, 8H, 4 x  $\text{CH}_2$ ). MS: calculated for  $\text{MH}^+ = 341$ , found 341.

**(2R,3R,4R,5S)-1-(6-(Benzyloxy)hexyl)-2-(hydroxymethyl)piperidine-3,4,5-triol (3v).**

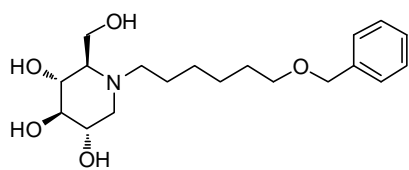

White semi-solid. Yield, 69%.  $[\alpha]_{\text{D}} = -4$  ( $c = 1.5$ , methanol).  $^1\text{H}$  NMR (300 MHz,  $\text{CD}_3\text{OD}$ ):  $\delta$  7.34-7.25 (m, 5H,  $\text{CH}_{\text{ar}}$ ), 4.49 (s, 2H,  $\text{ArCH}_2\text{O}$ ), 3.86 (d,  $J = 2.7$  Hz, 2H,  $\text{OCH}_2$ ), 3.53-3.45 (m, 3H, 3 x

OCH), 3.37 (t,  $J = 9.6$  Hz, 1H, OCH), 3.14 (t,  $J = 9.0$  Hz, 1H, OCH), 3.04 (dd,  $J = 11.4, 5.1$  Hz, 1H, NCH), 2.88-2.80 (m, 1H, NCH), 2.69-2.64 (m, 1H, NCH), 2.30-2.21 (m, 2H, 2 x NCH), 1.66-1.27 (m, 8H, 4 x CH<sub>2</sub>). MS: calculated for MH<sup>+</sup> = 354, found 354.

#### d. Synthesis of DNJ Derivatives 4.

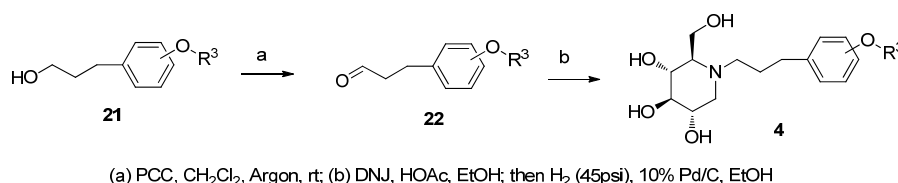

*d.a. General Procedure for the Preparation of Aldehydes 24.* To a stirring suspension of PCC (647 mg, 3 mmol) and silica gel (647 mg) in dry dichloromethane (10 mL), was added a solution of the alcohol **23** (2 mmol) in dichloromethane (10 mL). The reaction mixture was stirred at room temperature under argon atmosphere for 4 hours. Then, it was filtered through a silica gel pad, and washed with ethyl acetate (20 mL). The filtrate was concentrated and then purified through silica gel column chromatography (ethyl acetate : hexanes = 0 : 100 to 10 : 90) to afford the pure compound **24**.

*d.b. General Procedure for the Synthesis of DNJ Derivatives 4.* A solution of DNJ (33 mg, 0.2 mmol) in acetic acid (1 mL) was stirred at room temperature overnight. The solvent was then removed under reduced pressure. The resulting residue was treated with 200 proof ethanol (5 mL) and the aldehyde **24** (0.26 mmol), followed by acetic acid (2 drops as catalyst). The reaction mixture was stirred at room temperature under argon atmosphere for another hour. Then, it was transferred to the hydrogenation bottle, followed by addition of 10% Pd/C (33 mg) and 200 proof ethanol (5 mL). The mixture was hydrogenated under 45 psi of H<sub>2</sub> for 24 hours. After the reaction was complete, it was treated with celite (100 mg), and then filtered through a silica gel pad. The filtrate was concentrated and purified through silica gel column chromatography (methanol : ethyl acetate = 5 : 95 to 20 : 80) to afford the pure compound **4**.

**(2R,3R,4R,5S)-2-(Hydroxymethyl)-1-(3-(2-propoxyphenyl)propyl)piperidine-3,4,5-triol (4a).**

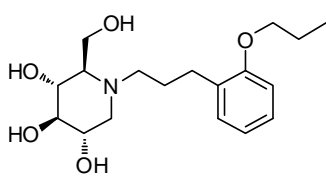

White solid. Yield, 97%.  $^1\text{H NMR}$  (300 MHz,  $\text{CD}_3\text{OD}$ ):  $\delta$  7.15-7.10 (m, 2H,  $\text{CH}_{\text{ar}}$ ), 6.89-6.80 (m, 2H,  $\text{CH}_{\text{ar}}$ ), 3.93 (t,  $J = 6.3$  Hz, 2H,  $\text{ArOCH}_2$ ), 3.81 (t,  $J = 3.0$  Hz, 2H,  $\text{OCH}_2$ ), 3.50-3.42 (m, 1H, OCH), 3.36 (t,  $J = 9.3$  Hz, 1H, OCH), 3.11 (t,  $J = 9.3$  Hz, 1H, OCH), 2.98 (dd,  $J = 11.4, 5.1$  Hz, 1H, NCH), 2.88-2.80 (m, 1H, NCH), 2.73-2.57 (m, 3H, NCH and  $\text{ArCH}_2$ , overlapped), 2.25-2.12 (m, 2H, 2 x NCH), 1.86-1.76 (m, 4H, 2 x  $\text{CH}_2$ ), 1.08 (t,  $J = 7.5$  Hz, 3H,  $\text{CH}_3$ ). MS: calculated for  $\text{MH}^+ = 340$ , found 340.

**(2R,3R,4R,5S)-2-(Hydroxymethyl)-1-(3-(3-propoxyphenyl)propyl)piperidine-3,4,5-triol (4b).**

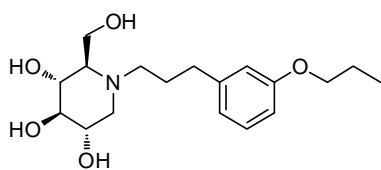

White semi-solid. Yield, 97%.  $[\alpha]_{\text{D}} = -6$  ( $c = 1.7$ , methanol).  $^1\text{H NMR}$  (300 MHz,  $\text{CD}_3\text{OD}$ ):  $\delta$  7.18-7.12 (m, 1H,  $\text{CH}_{\text{ar}}$ ), 6.77-6.69 (m, 3H,  $\text{CH}_{\text{ar}}$ ), 3.90 (t,  $J = 6.6$  Hz, 2H,  $\text{ArOCH}_2$ ), 3.81 (d,  $J = 2.7$  Hz, 2H,  $\text{OCH}_2$ ), 3.49-3.43 (m, 1H, OCH), 3.35 (t,  $J = 9.3$  Hz, 1H, OCH), 3.13 (t,  $J = 9.3$  Hz, 1H, OCH), 2.99 (dd,  $J = 11.4, 5.1$  Hz, 1H, NCH), 2.87-2.84 (m, 1H, NCH), 2.67-2.54 (m, 3H, NCH and  $\text{ArCH}_2$ , overlapped), 2.27-2.16 (m, 2H, 2 x NCH), 1.84-1.74 (m, 4H, 2 x  $\text{CH}_2$ ), 1.03 (t,  $J = 7.5$  Hz, 3H,  $\text{CH}_3$ ). MS: calculated for  $\text{MH}^+ = 340$ , found 340.

**(2R,3R,4R,5S)-2-(Hydroxymethyl)-1-(3-(4-propoxyphenyl)propyl)piperidine-3,4,5-triol (4c).**

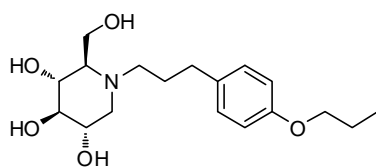

White solid. Yield, 97%.  $^1\text{H NMR}$  (300 MHz,  $\text{CD}_3\text{OD}$ ):  $\delta$  7.11-7.06 (m, 2H,  $\text{CH}_{\text{ar}}$ ), 6.83-6.78 (m, 2H,  $\text{CH}_{\text{ar}}$ ), 3.88 (t,  $J = 6.6$  Hz, 2H,  $\text{ArOCH}_2$ ), 3.79 (d,  $J = 2.7$  Hz, 2H,  $\text{OCH}_2$ ), 3.50-3.42 (m, 1H, OCH), 3.34 (t,  $J = 9.6$  Hz, 1H, OCH), 3.12 (t,  $J = 9.3$  Hz, 1H, OCH), 2.97 (dd,  $J = 11.4, 4.8$  Hz, 1H, NCH), 2.88-2.78 (m, 1H, NCH), 2.67-2.50 (m, 3H, NCH and  $\text{ArCH}_2$ , overlapped), 2.23-2.11 (m, 2H, 2 x NCH), 1.82-1.71 (m, 4H, 2 x  $\text{CH}_2$ ), 1.03 (t,  $J = 7.5$  Hz, 3H,  $\text{CH}_3$ ). MS: calculated for  $\text{MH}^+ = 340$ , found 340.

**(2R,3R,4R,5S)-1-(3-(2-(Cyclohexyloxy)phenyl)propyl)-2-(hydroxymethyl)piperidine-3,4,5-triol**

**(4d).**

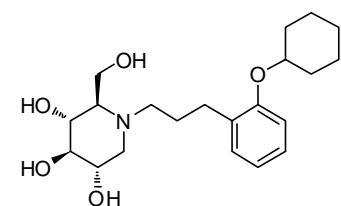

White solid. Yield, 92%.  $^1\text{H NMR}$  (300 MHz,  $\text{CD}_3\text{OD}$ ):  $\delta$  7.14-7.08 (m, 2H,  $\text{CH}_{\text{ar}}$ ), 6.90-6.78 (m, 2H,  $\text{CH}_{\text{ar}}$ ), 4.37-4.31 (m, 1H, ArOCH), 3.88-3.77 (m, 2H,  $\text{OCH}_2$ ), 3.53-3.44 (m, 1H, OCH), 3.39 (t,  $J = 9.3$  Hz, 1H, OCH), 3.14 (t,  $J = 9.0$  Hz, 1H, OCH), 3.02 (dd,  $J = 11.7, 5.1$  Hz, 1H, NCH), 2.92-2.85 (m, 1H, NCH), 2.79-2.71 (m, 1H, NCH), 2.59 (t,  $J = 7.8$  Hz, 2H,  $\text{ArCH}_2$ ), 2.33-2.21 (m, 2H, 2 x NCH), 2.01-1.40 (m, 12H, 6 x  $\text{CH}_2$ ).

MS: calculated for  $\text{MH}^+ = 380$ , found 380.

**(2R,3R,4R,5S)-1-(3-(3-(Cyclohexyloxy)phenyl)propyl)-2-(hydroxymethyl)piperidine-3,4,5-triol**

**(4e).**

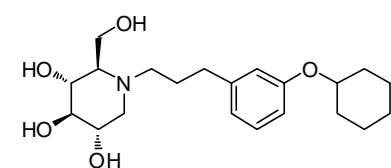

White solid. Yield, 96%.  $^1\text{H NMR}$  (300 MHz,  $\text{CD}_3\text{OD}$ ):  $\delta$  7.17-7.12 (m, 1H,  $\text{CH}_{\text{ar}}$ ), 6.76-6.71 (m, 3H,  $\text{CH}_{\text{ar}}$ ), 4.31-4.25 (m, 1H, ArOCH), 3.81 (s, 1H,  $\text{OCH}_2$ ), 3.51-3.43 (m, 1H, OCH), 3.36 (t,  $J = 9.6$  Hz, 1H, OCH), 3.13 (t,  $J = 9.0$  Hz, 1H, OCH), 3.00 (dd,  $J = 11.4, 5.1$  Hz, 1H, NCH), 2.92-2.82 (m, 1H, NCH), 2.70-2.53 (m, 3H, NCH and  $\text{ArCH}_2$ , overlapped), 2.28-2.17 (m, 2H, 2 x NCH), 2.01-1.36 (m, 12H, 6 x  $\text{CH}_2$ ).

MS: calculated for  $\text{MH}^+ = 380$ , found 380.

**(2R,3R,4R,5S)-1-(3-(4-(Cyclohexyloxy)phenyl)propyl)-2-(hydroxymethyl)piperidine-3,4,5-triol**

**(4f).**

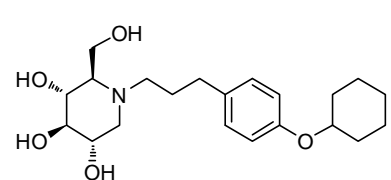

White solid. Yield, 95%.  $^1\text{H NMR}$  (300 MHz,  $\text{CD}_3\text{OD}$ ):  $\delta$  7.08 (d,  $J = 8.4$  Hz, 2H,  $\text{CH}_{\text{ar}}$ ), 6.81 (d,  $J = 8.4$  Hz, 2H,  $\text{CH}_{\text{ar}}$ ), 4.26-4.20 (m, 1H, ArOCH), 3.80 (s, 2H,  $\text{OCH}_2$ ), 3.51-3.43 (m, 1H, OCH), 3.36 (t,  $J = 9.3$  Hz, 1H, OCH), 3.13 (t,  $J = 9.3$  Hz, 1H, OCH), 2.99 (dd,  $J = 11.1, 4.8$  Hz, 1H, NCH), 2.90-2.81 (m, 1H, NCH), 2.70-2.58 (m, 1H, NCH), 2.56-2.50 (m, 2H,  $\text{ArCH}_2$ ), 2.27-2.16 (m, 2H, 2 x NCH), 2.01-1.29 (m, 12H, 6 x  $\text{CH}_2$ ). MS: calculated for  $\text{MH}^+ = 380$ , found 380.

*e. Synthesis of DNJ Derivative 5a.*

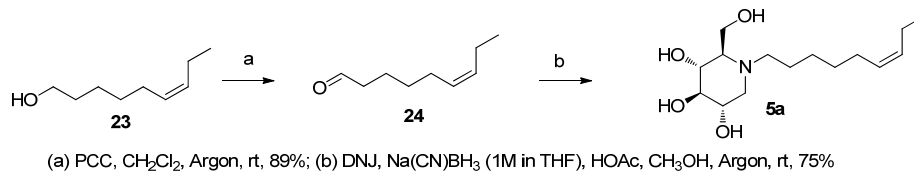

*e.a. Preparation of (Z)-Non-6-enal (26).* To a stirring suspension of PCC (841 mg, 3.9 mmol) and silica gel (841 mg) in dry dichloromethane (20 mL), was added a solution of the alcohol **25** (427 mg, 3 mmol) in dichloromethane (10 mL). The reaction mixture was stirred at room temperature under argon atmosphere for 4 hours. Then, it was filtered through a silica gel pad, and washed with ethyl acetate (20 mL). The filtrate was concentrated and then purified through silica gel column chromatography (ethyl acetate : hexanes = 0 : 100 to 10 : 90) to afford 375 mg of pure compound **26** as colorless oil. Yield, 89%.

*e.b. Synthesis of (2R,3R,4R,5S)-2-(Hydroxymethyl)-1-((Z)-non-6-en-1-yl)piperidine-3,4,5-triol (5a).* To a solution of DNJ (33 mg, 0.2 mmol) and (Z)-non-6-enal (**26**, 36 mg, 0.26 mmol) in methanol (5 mL), was added acetic acid (24  $\mu$ L, 0.4 mmol), followed by the addition of sodium cyanoborohydride (1 M in THF, 0.3 mL, 0.3 mmol). The reaction mixture was stirred at room temperature under argon atmosphere for 24 hours. Then, it was quenched with water (5 mL), concentrated and purified through silica gel column chromatography (methanol : ethyl acetate = 5 : 95 to 20 : 80) to afford 43 mg of pure compound **5a** as colorless semi-solid. Yield, 75%. <sup>1</sup>H NMR (300 MHz, CD<sub>3</sub>OD):  $\delta$  5.38-5.29 (m, 2H, 2 x CH=), 3.86 (d,  $J$  = 1.8 Hz, 2H, OCH<sub>2</sub>), 3.54-3.46 (m, 1H, OCH), 3.38 (t,  $J$  = 9.6 Hz, 1H, OCH), 3.16 (t,  $J$  = 9.0 Hz, 1H, OCH), 3.04 (dd,  $J$  = 11.1, 4.8 Hz, 1H, NCH), 2.88-2.80 (m, 1H, NCH), 2.71-2.64 (m, 1H, NCH), 2.32-2.22 (m, 2H, 2 x NCH), 2.08-1.99 (m, 4H, 2 x CH<sub>2</sub>), 1.58-1.26 (m, 6H, 3 x CH<sub>2</sub>), 0.95 (t,  $J$  = 7.8 Hz, 3H, CH<sub>3</sub>). MS: calculated for MH<sup>+</sup> = 288, found 288.

**f. Synthesis of DNJ Derivative 5b.**

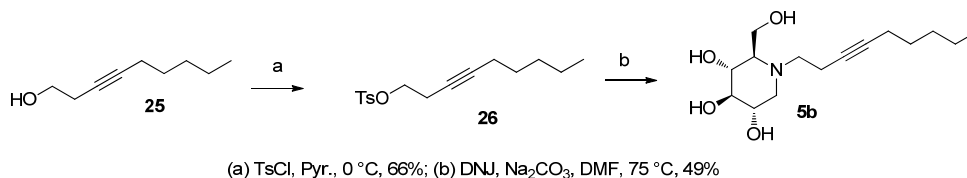

*f.a. Preparation of Non-3-yn-1-yl 4-Methylbenzenesulfonate (28).* To a stirring solution of non-3-yn-1-ol (**27**, 421 mg, 3 mmol) in pyridine (6 mL) at 0 °C, was added 4-toluenesulfonyl chloride (686 mg, 3.6 mmol). The reaction mixture was stirred at 0 °C for 3hrs. Then, it was quenched with 2 N HCl, acidified to pH 1~2 at 0 °C, and extracted with ethyl acetate (20 mL x 3). The combined organic layer was washed with brine (20 mL), dried over anhydrous sodium sulfate, concentrated and purified through silica gel column chromatography (ethyl acetate : hexanes = 0 : 100 to 10 : 90) to afford 585 mg of pure compound **28** as colorless oil. Yield, 66%.

*f.b. Synthesis of (2R,3R,4R,5S)-2-(Hydroxymethyl)-1-(non-3-yn-1-yl)piperidine-3,4,5-triol (5b).* A reaction mixture of non-3-yn-1-yl 4-methylbenzenesulfonate (**28**, 294 mg, 1 mmol), DNJ (49 mg, 0.3 mmol) and sodium carbonate (159 mg, 1.5 mmol) in DMF (3 mL) was stirred at 75 °C in a sealed tube for 24 hours. After cooling to room temperature, the reaction was quenched with water (10 mL), concentrated and slurried in a mixture of methanol and dichloromethane (40 : 60, 10 mL). The solid was filtered off and the filtrate was concentrated to give the crude product, which was purified by preparative TLC plate (methanol : ethyl acetate = 10 : 90) to afford 45 mg of pure compound **5b** as white semi-solid. Yield, 49%. <sup>1</sup>H NMR (300 MHz, CD<sub>3</sub>OD): δ 3.92-3.81 (m, 2H, OCH<sub>2</sub>), 3.49-3.41 (m, 1H, OCH), 3.33 (t, *J* = 9.0 Hz, 1H, OCH), 3.12 (t, *J* = 9.0 Hz, 1H, OCH), 3.01-2.81 (m, 3H), 2.35-2.09 (m, 6H), 1.48-1.28 (m, 6H, 3 x CH<sub>2</sub>), 0.91 (t, *J* = 7.2 Hz, 3H, CH<sub>3</sub>). MS: calculated for MH<sup>+</sup> = 286, found 286.

**g. Synthesis of DNJ Derivatives 5c-5e.**

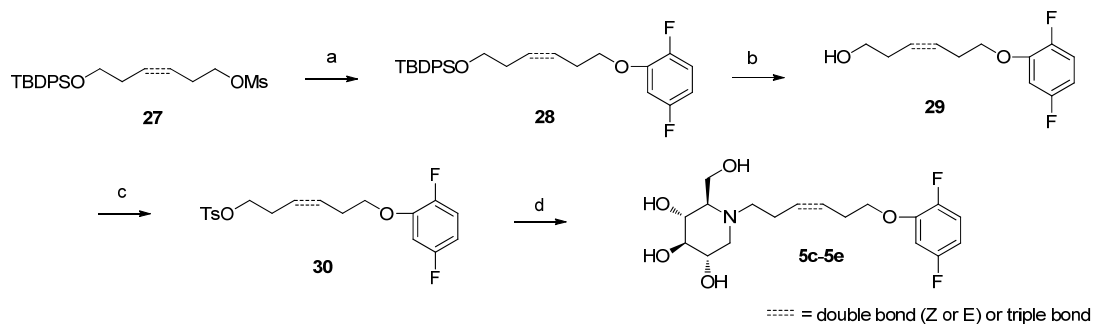

(a) 2,5-difluorophenol,  $K_2CO_3$ , DMF, 80 °C; (b) TBAF (1M in THF), THF, rt; (c) TsCl, Pyr., 0 °C; (d) DNJ,  $Na_2CO_3$ , DMF, 75 °C

*g.a. General Procedure for the Preparation of Intermediates 30.* To a solution of the mesylate **29** (3 mmol) and 2,5-difluorophenol (585 mg, 4.5 mmol) in DMF (10 mL), was added potassium carbonate (622 mg, 4.5 mmol). The reaction mixture was stirred at 80 °C for 1 hour. After cooling to room temperature, it was quenched with water (20 mL) and extracted with ethyl acetate (20 mL x 3). The combined organic layer was washed with brine (20 mL), dried over anhydrous sodium sulfate, concentrated and purified through silica gel column chromatography (ethyl acetate : hexanes = 0 : 100 to 5 : 95) to afford the pure compound **30**.

*g.b. General Procedure for the Preparation of Alcohols 31.* To a stirred solution of the intermediate **30** (2.44 mmol) in THF (20 mL), was added tetra-*n*-butylammonium fluoride (1 M in THF, 12.2 mL, 12.2 mmol). The reaction mixture was stirred at room temperature for 2 hours. Then, it was quenched with water (30 mL) and extracted with ethyl acetate (30 mL x 3). The combined organic layer was washed with brine (30 mL), dried over anhydrous sodium sulfate, concentrated and purified through silica gel column chromatography (ethyl acetate : hexanes = 10 : 90 to 25 : 75) to afford the pure compound **31**.

*g.c. General Procedure for the Preparation of Tosylates 32.* To a stirring solution of the alcohol **31** (2.15 mmol) in pyridine (5 mL) at 0 °C, 4-toluenesulfonyl chloride (492 mg, 2.58 mmol) was added. The reaction mixture was stirred at 0 °C for 3hrs. Then it was quenched with 2 N HCl, acidified to pH 1~2 at 0 °C, and extracted with ethyl acetate (20 mL x 3). The combined organic layer was washed with brine,



dried over anhydrous sodium sulfate, concentrated and purified through silica gel column chromatography (ethyl acetate : hexanes = 0 : 100 to 10 : 90) to afford the pure compound **32**.

*g.d. General Procedure for the Synthesis of DNJ Derivatives 5c-5e.* A reaction mixture of the tosylate **32** (126 mg, 0.33 mmol), DNJ (16 mg, 0.1 mmol) and sodium carbonate (53 mg, 0.5 mmol) in DMF (3 mL) was stirred at 75 °C in a sealed tube for 24 hours. After cooling to room temperature, the reaction was quenched with water (10 mL), concentrated and slurried in a mixture of methanol and dichloromethane (40 : 60, 10 mL). The solid was filtered off and the filtrate was concentrated to give the crude product, which was purified by preparative thin layer chromatography (TLC) plate (methanol : ethyl acetate = 10 : 90) to afford the pure compound **5c-5e**.

**(2R,3R,4R,5S)-1-((Z)-6-(2,5-Difluorophenoxy)hex-3-en-1-yl)-2-(hydroxymethyl)piperidine-3,4,5-triol (5c).**

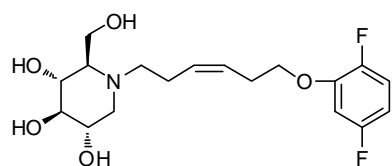

Colorless semi-solid. Yield, 30%. <sup>1</sup>H NMR (300 MHz, CD<sub>3</sub>OD): δ

7.10-7.01 (m, 1H, CH<sub>ar</sub>), 6.91-6.85 (m, 1H, CH<sub>ar</sub>), 6.64-6.58 (m, 1H, CH<sub>ar</sub>), 5.56-5.48 (m, 2H, 2 x CH=), 4.06-4.01 (m, 2H, ArOCH<sub>2</sub>), 3.87-

3.84 (m, 2H, OCH<sub>2</sub>), 3.49-3.42 (m, 1H, OCH), 3.34 (t, *J* = 7.2 Hz, 1H, OCH), 3.13 (t, *J* = 9.0 Hz, 1H, OCH), 3.00 (dd, *J* = 11.4, 5.1 Hz, 1H, NCH), 2.82-2.77 (m, 1H, NCH), 2.69-2.67 (m, 1H, NCH), 2.60-2.54 (m, 2H), 2.34-2.14 (m, 4H). MS: calculated for MH<sup>+</sup> = 374, found 374.

**(2R,3R,4R,5S)-1-((E)-6-(2,5-Difluorophenoxy)hex-3-en-1-yl)-2-(hydroxymethyl)piperidine-3,4,5-triol (5d).**

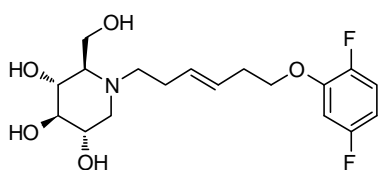

Colorless semi-solid. Yield, 6%. <sup>1</sup>H NMR (300 MHz, CD<sub>3</sub>OD): δ 7.00-

6.92 (m, 1H, CH<sub>ar</sub>), 6.81-6.74 (m, 1H, CH<sub>ar</sub>), 6.55-6.48 (m, 1H, CH<sub>ar</sub>), 5.52-5.47 (m, 2H, 2 x CH=), 3.93 (t, *J* = 6.9 Hz, 2H, ArOCH<sub>2</sub>), 3.76 (s,

2H, OCH<sub>2</sub>), 3.41-3.33 (m, 1H, OCH), 3.25 (t, *J* = 11.2 Hz, 1H, OCH), 3.03 (t, *J* = 9.3 Hz, 1H, OCH), 2.89 (dd, *J* = 11.1, 5.1 Hz, 1H, NCH), 2.77-2.69 (m, 1H, NCH), 2.63-2.53 (m, 1H, NCH), 2.42-2.36 (m, 2H), 2.17-2.04 (m, 4H). MS: calculated for MH<sup>+</sup> = 374, found 374.

**(2R,3R,4R,5S)-1-(6-(2,5-Difluorophenoxy)hex-3-yn-1-yl)-2-(hydroxymethyl)piperidine-3,4,5-triol (5e).**

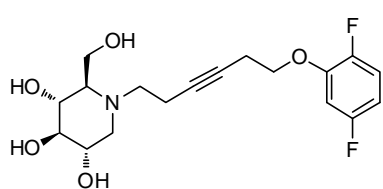

Colorless semi-solid. Yield, 37%. <sup>1</sup>H NMR (300 MHz, CD<sub>3</sub>OD): δ 7.11-

7.03 (m, 1H, CH<sub>ar</sub>), 6.93-6.87 (m, 1H, CH<sub>ar</sub>), 6.67-6.61 (m, 1H, CH<sub>ar</sub>),

4.11-4.07 (m, 2H, ArOCH<sub>2</sub>), 3.92-3.80 (m, 2H, OCH<sub>2</sub>), 3.48-3.40 (m,

1H, OCH), 3.35-3.32 (m, 1H, OCH, overlapped with the peaks of CH<sub>3</sub>OH), 3.11 (t, *J* = 9.3 Hz, 1H,

OCH), 2.99-2.83 (m, 3H), 2.66-2.60 (m, 2H), 2.37-2.16 (m, 4H). MS: calculated for MH<sup>+</sup> = 372, found

372.

## 2. NMR Spectra of Compounds 1-7

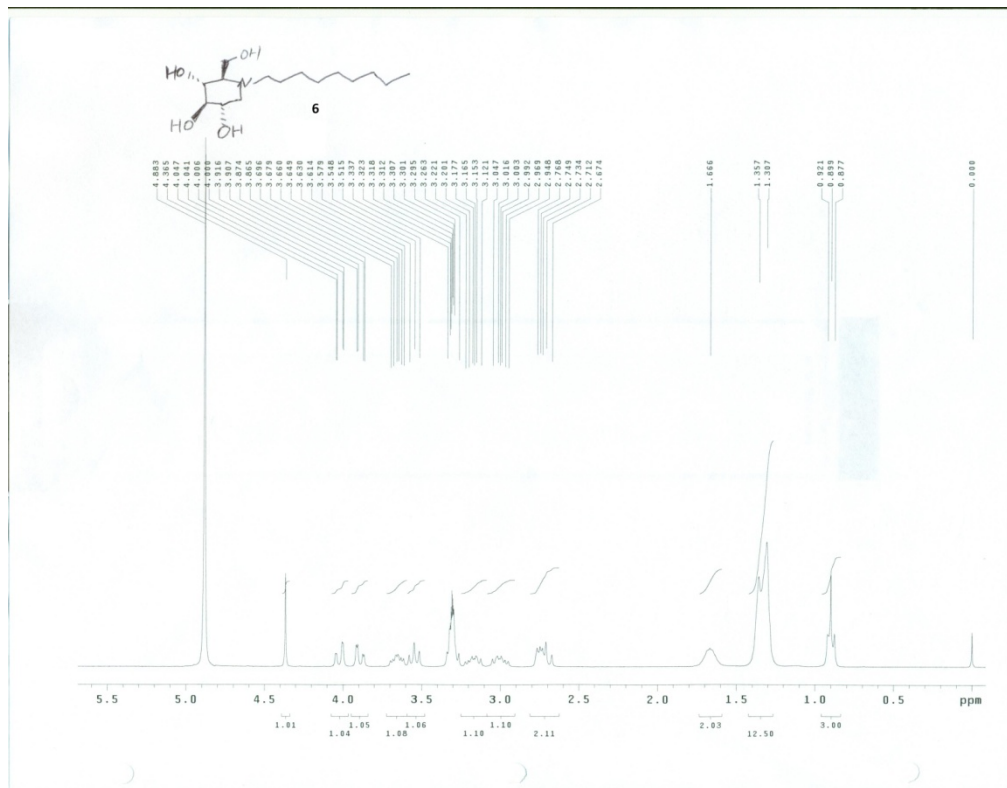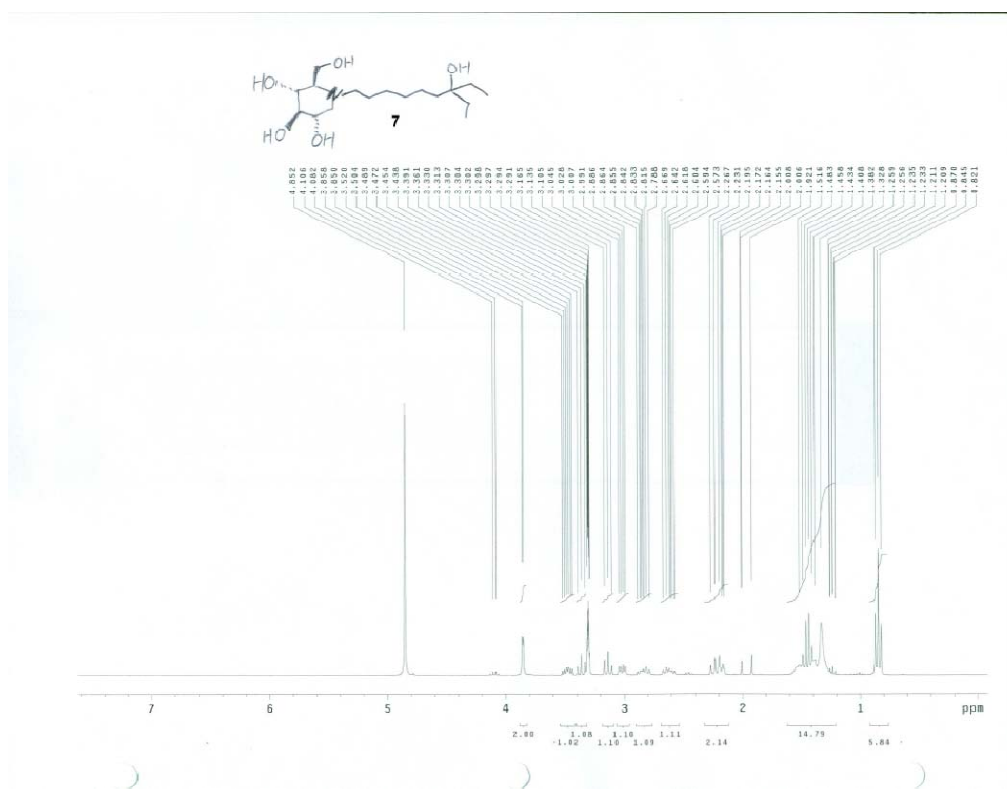

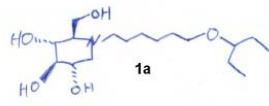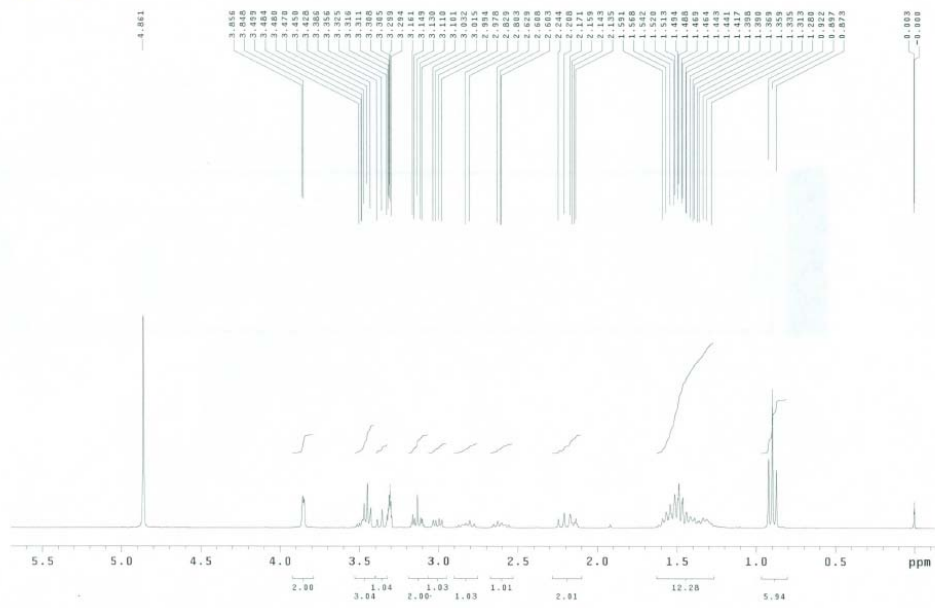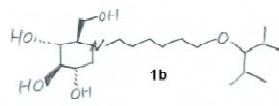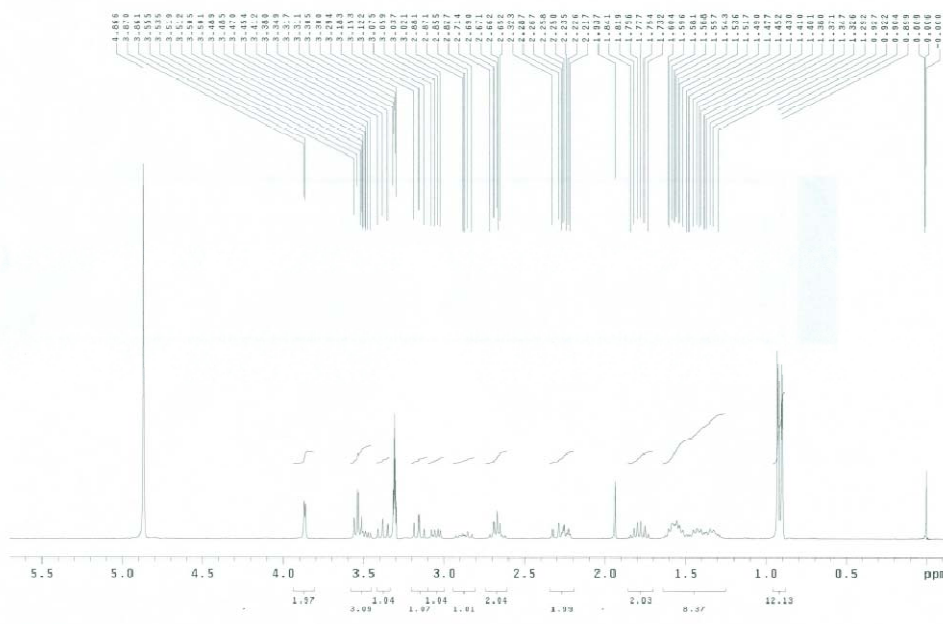

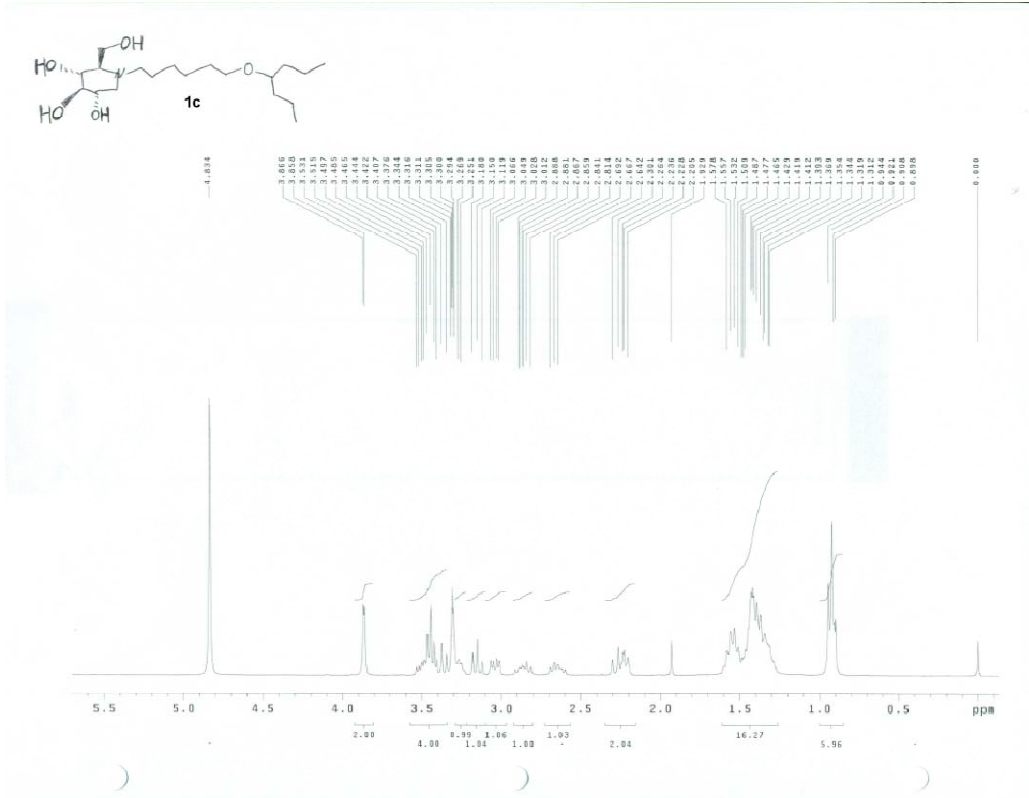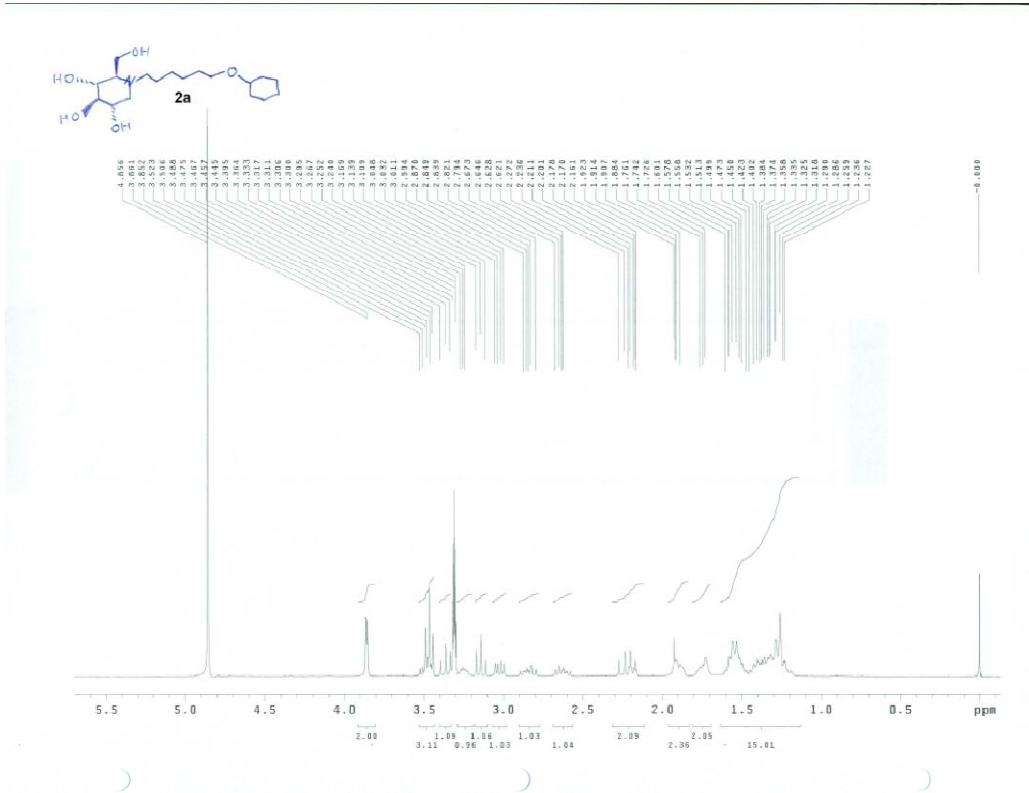

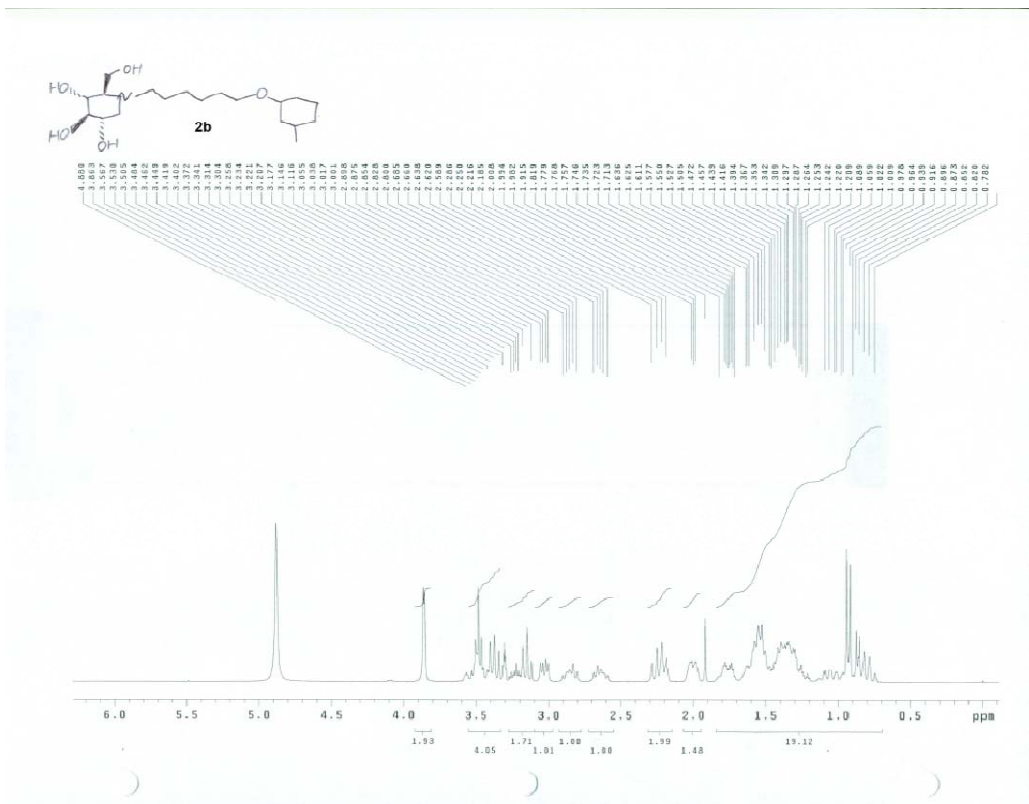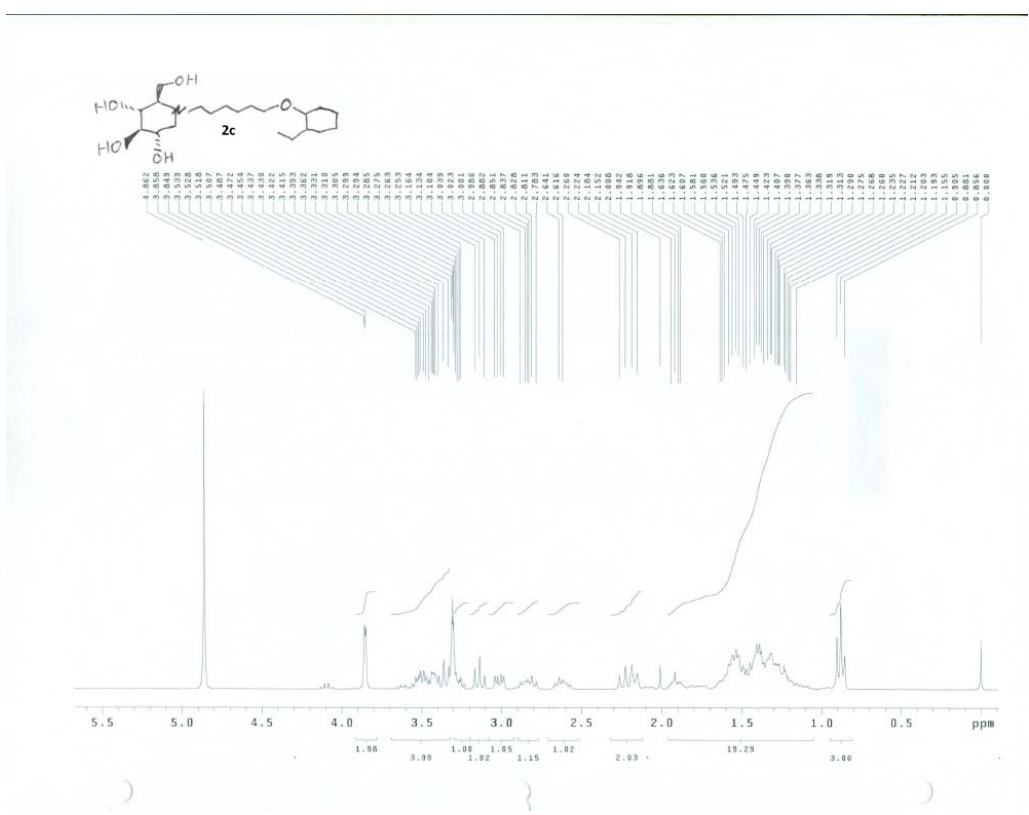

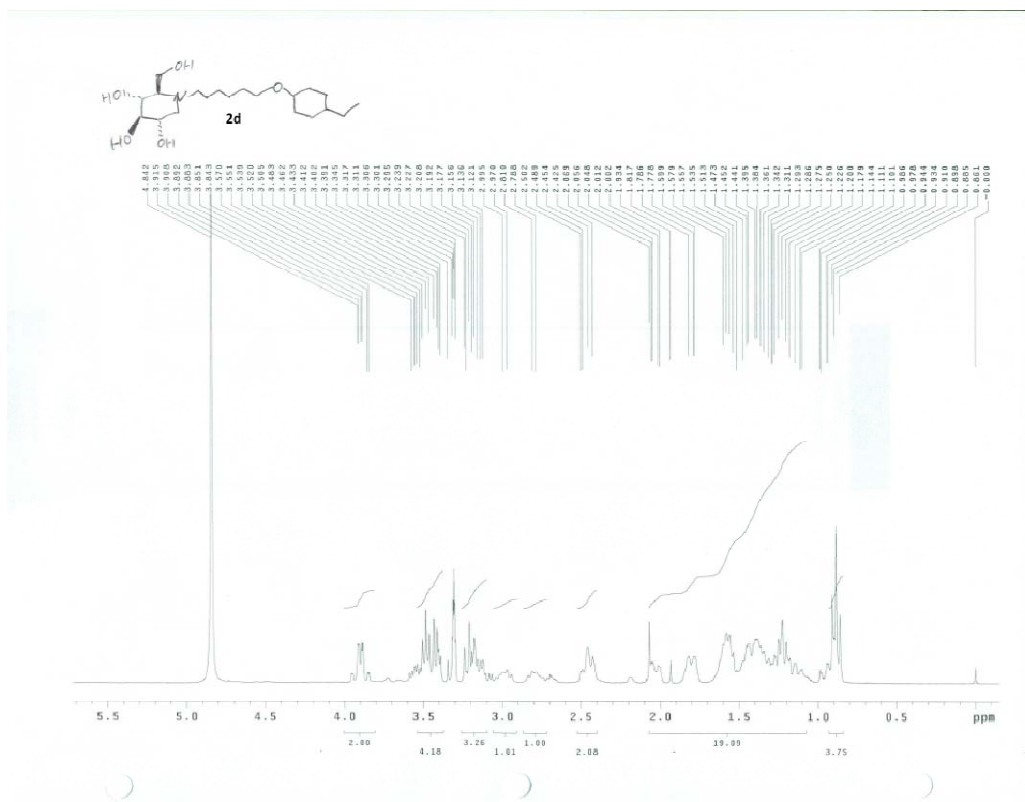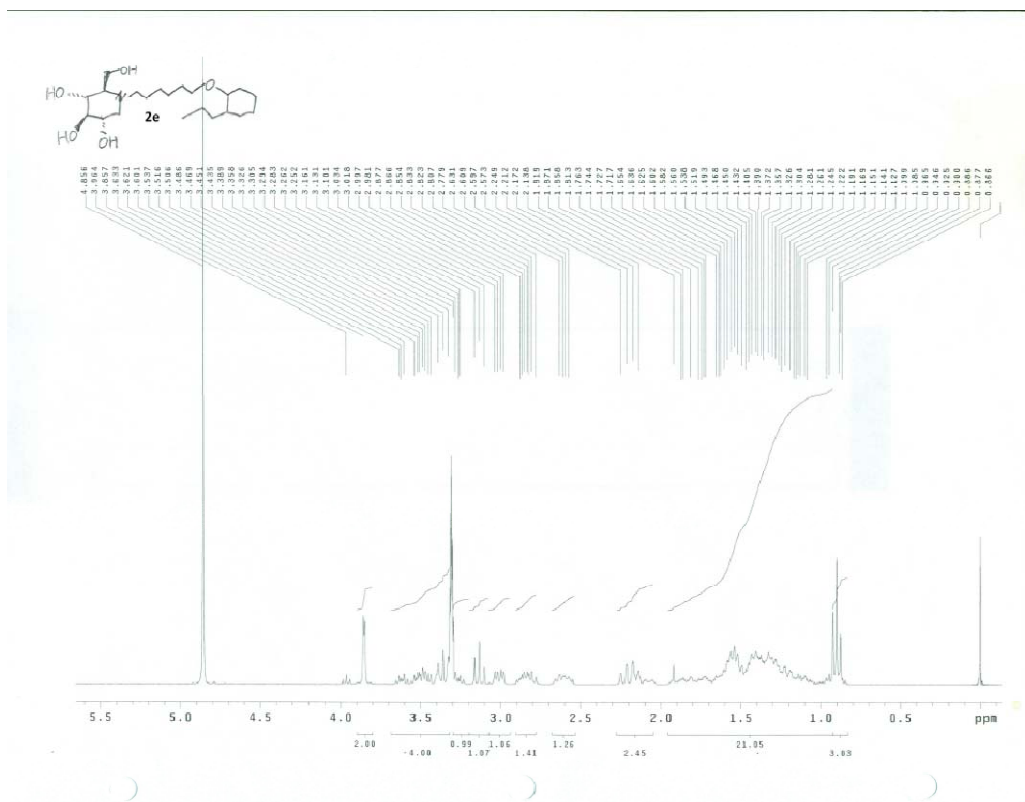

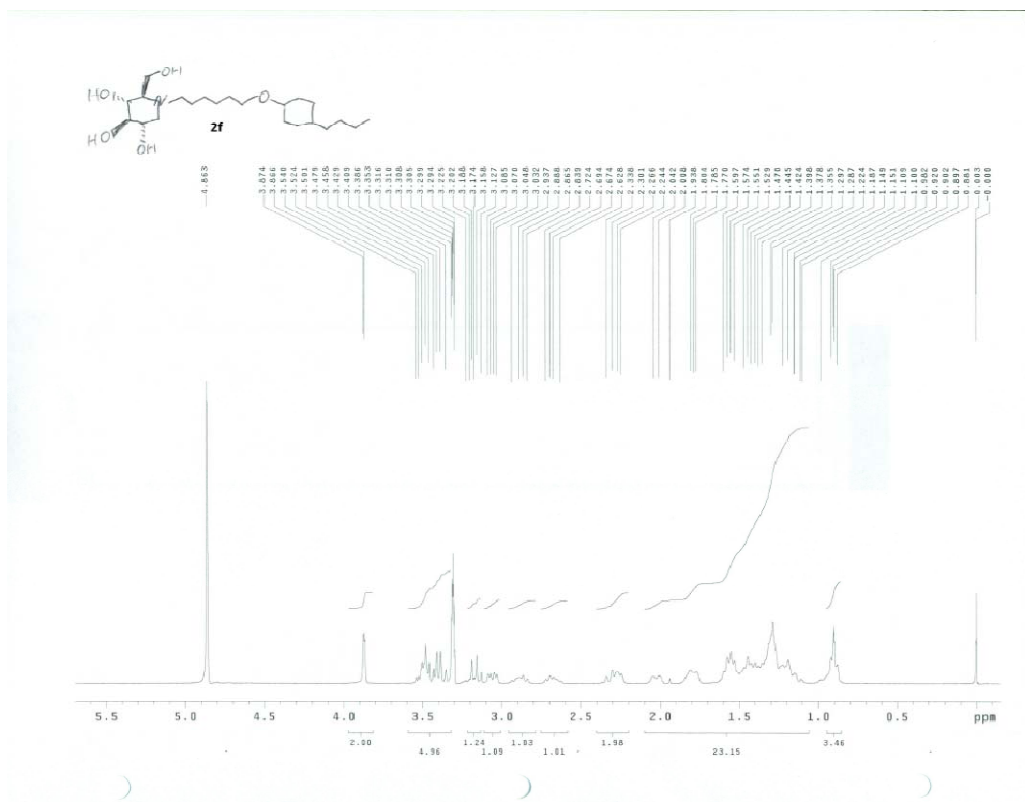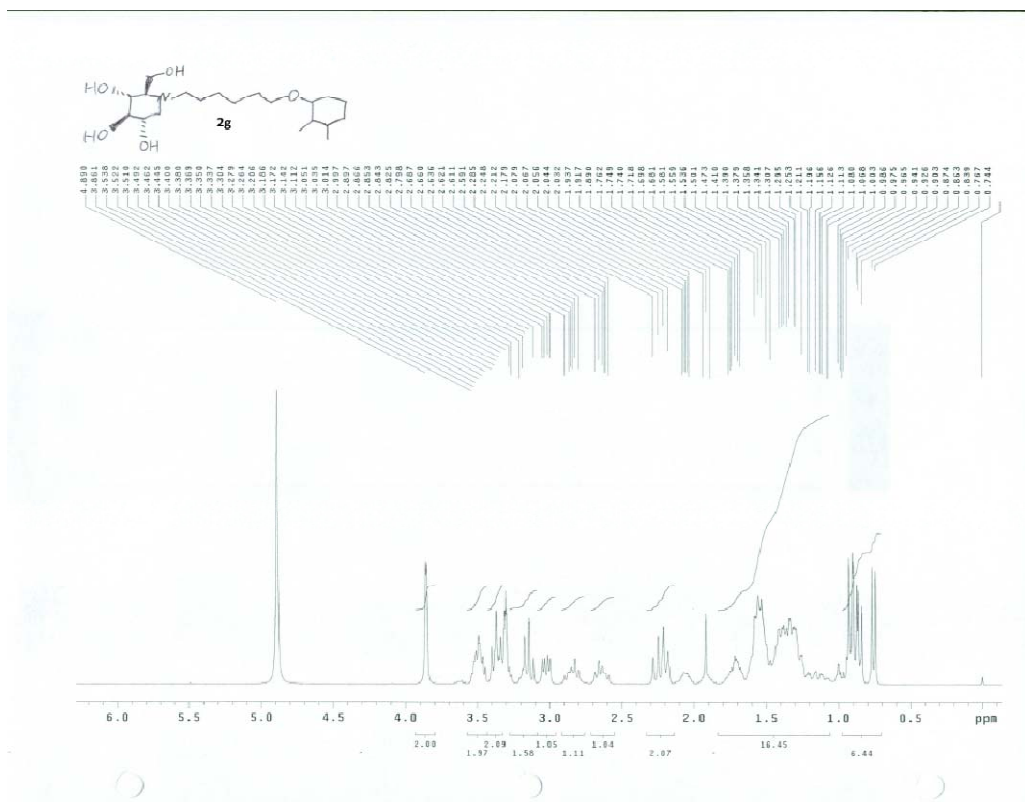



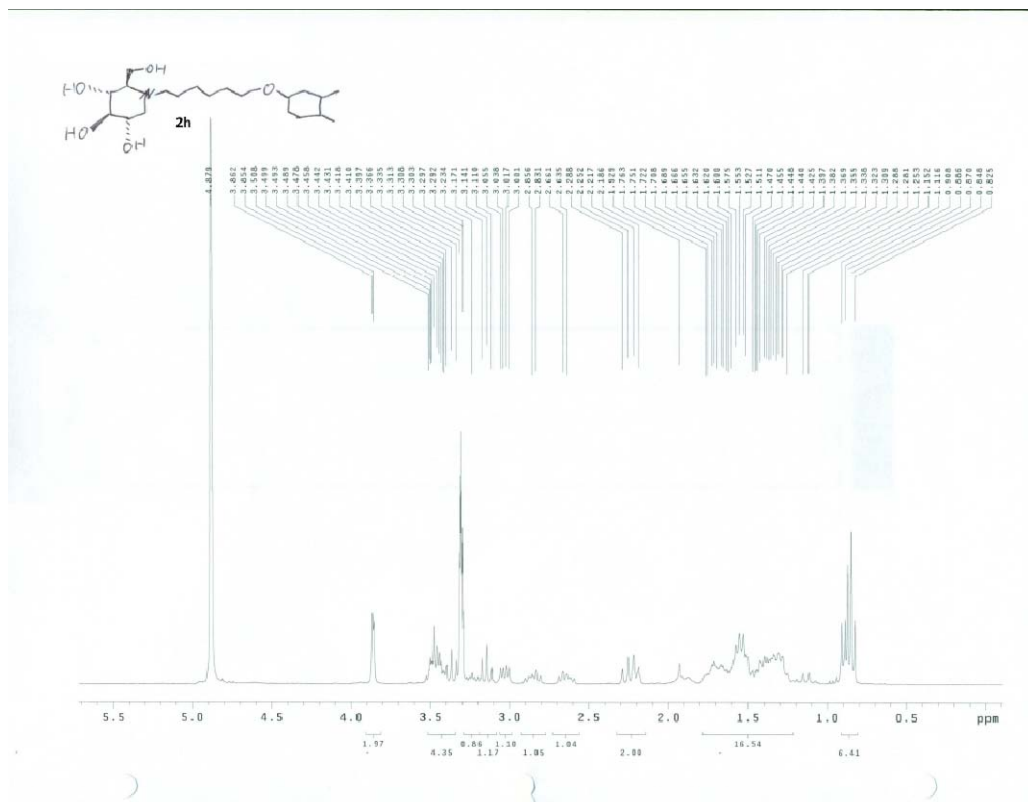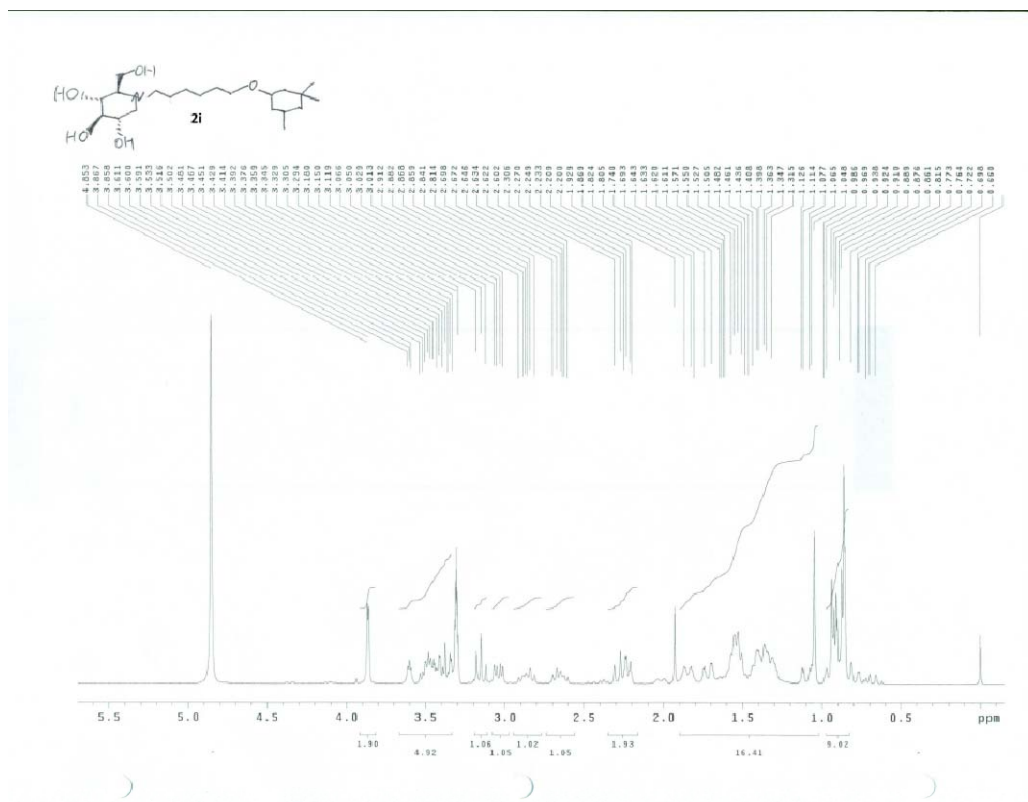

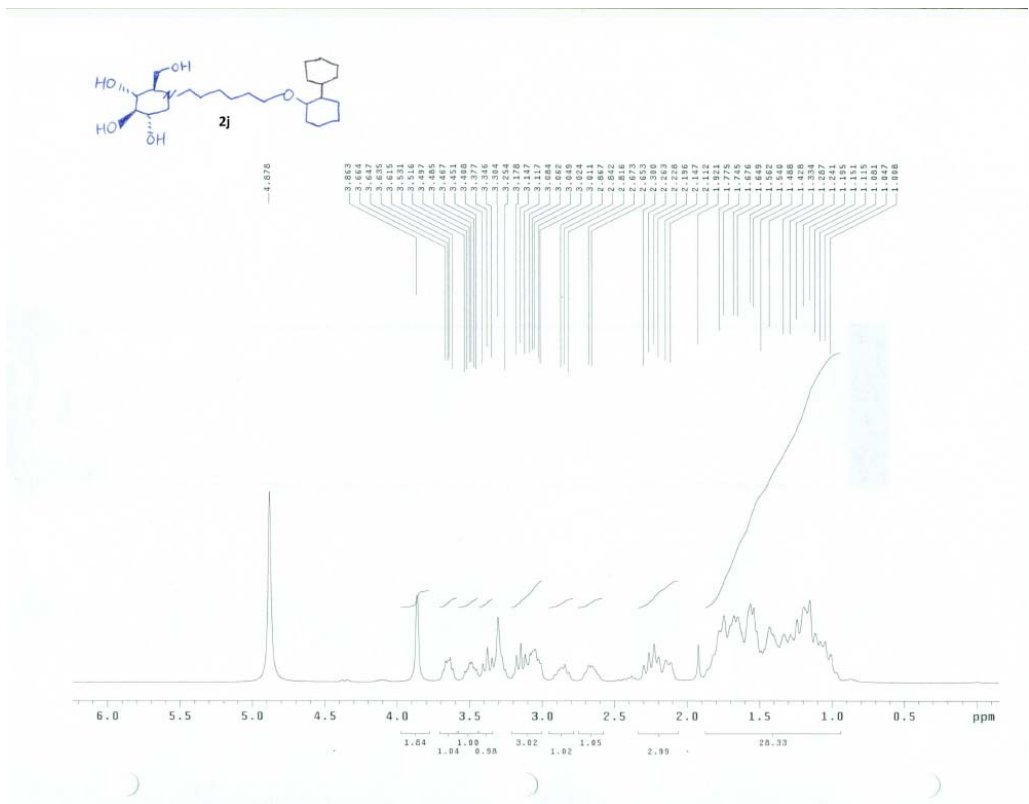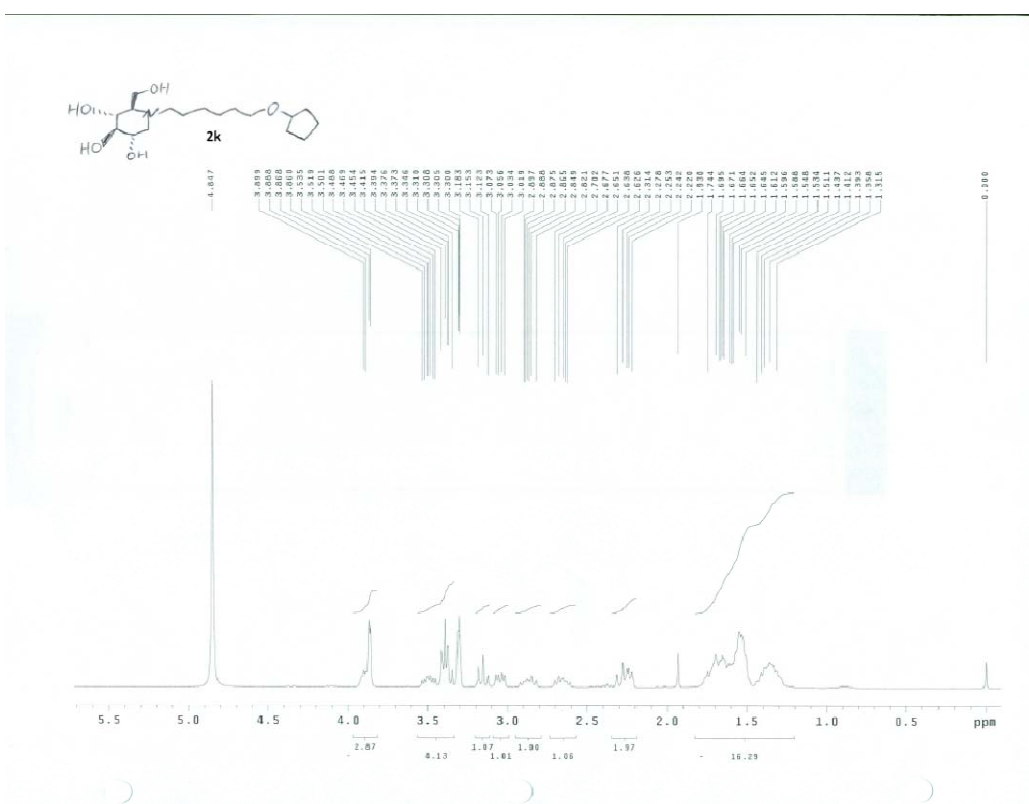

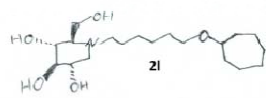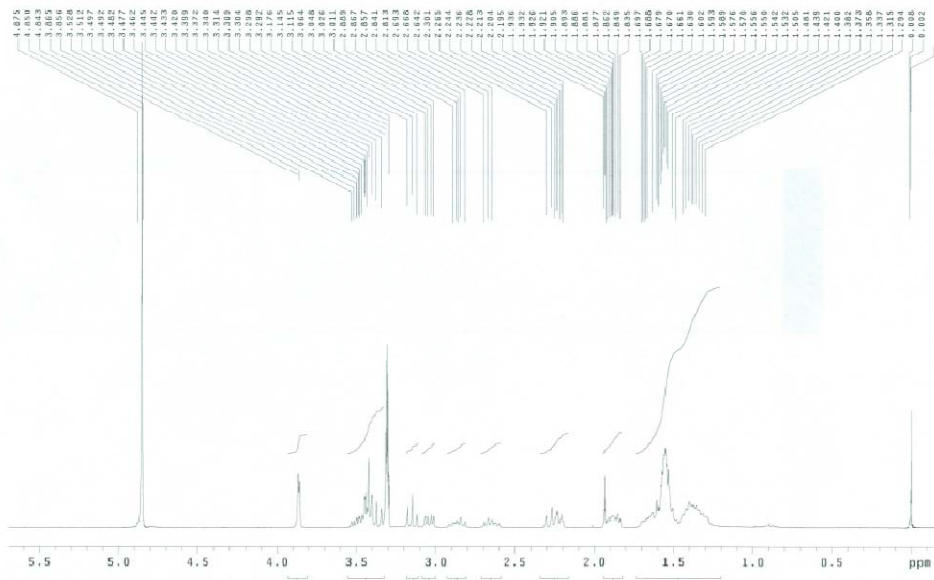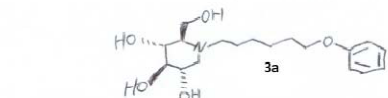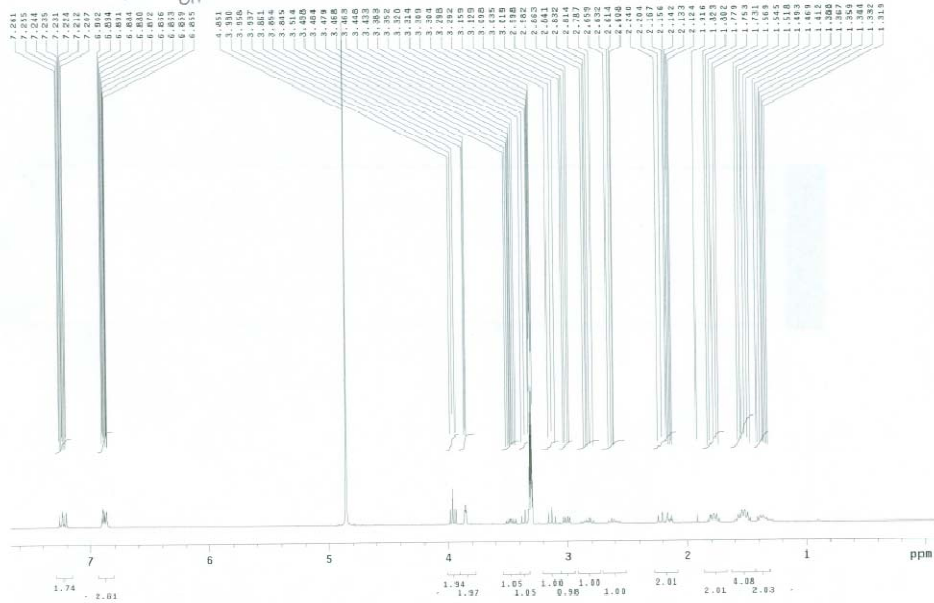

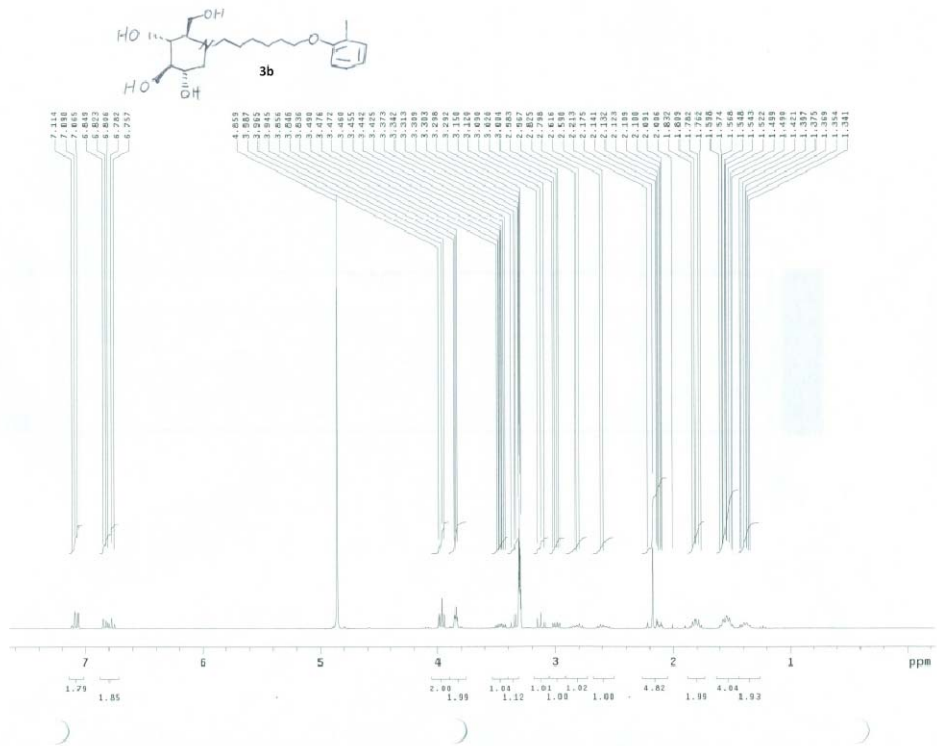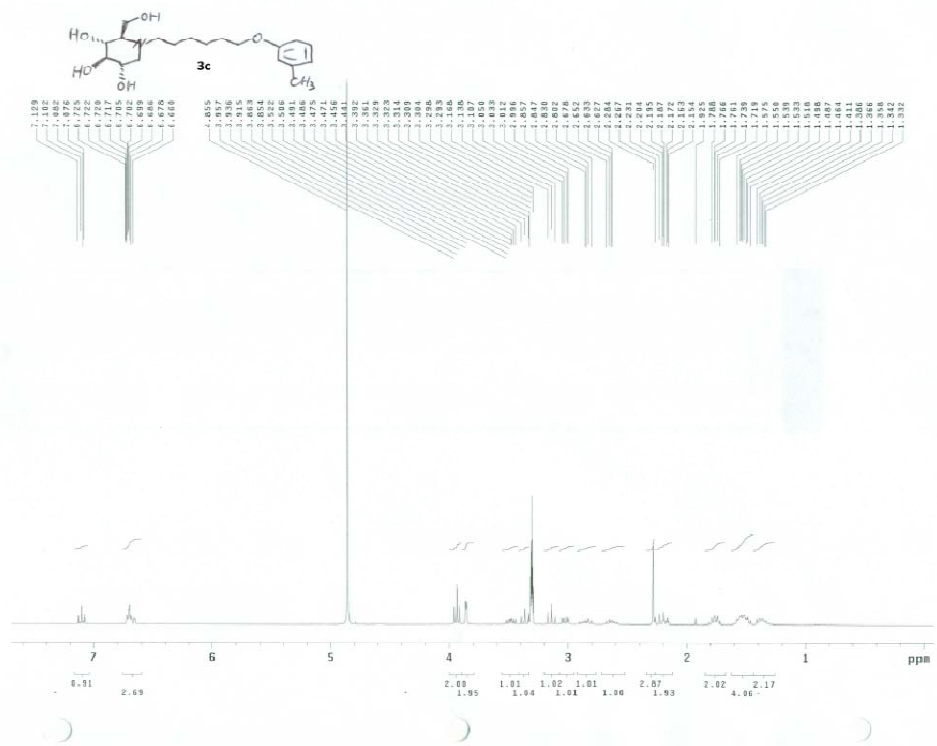

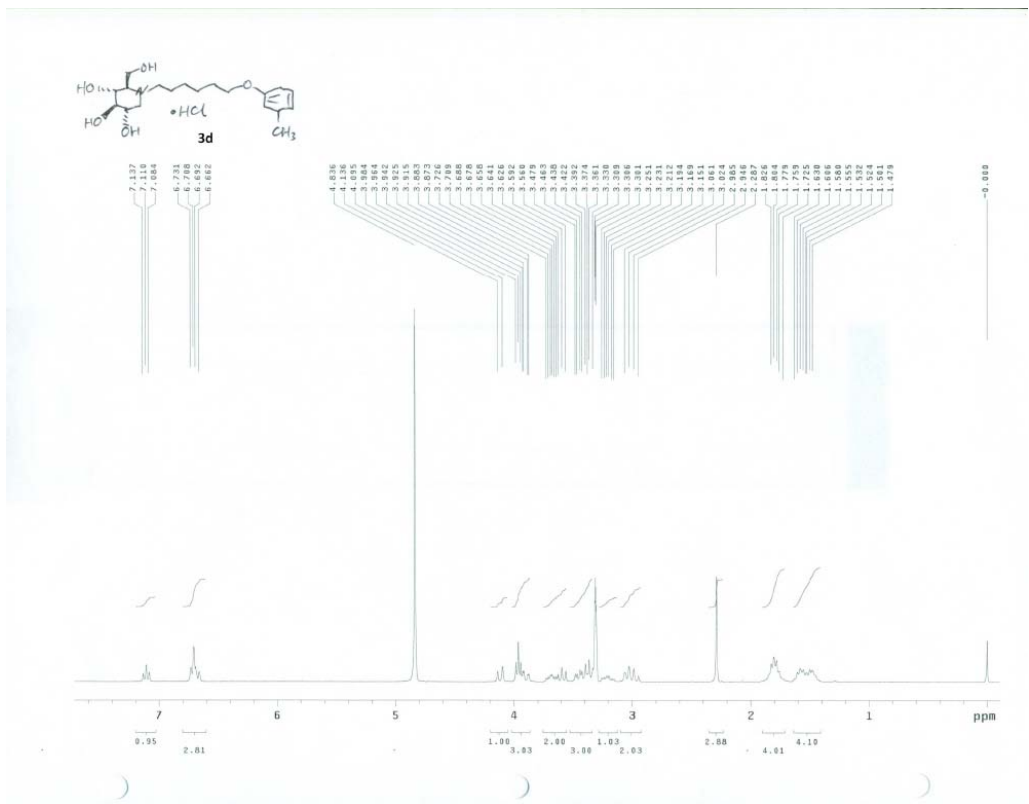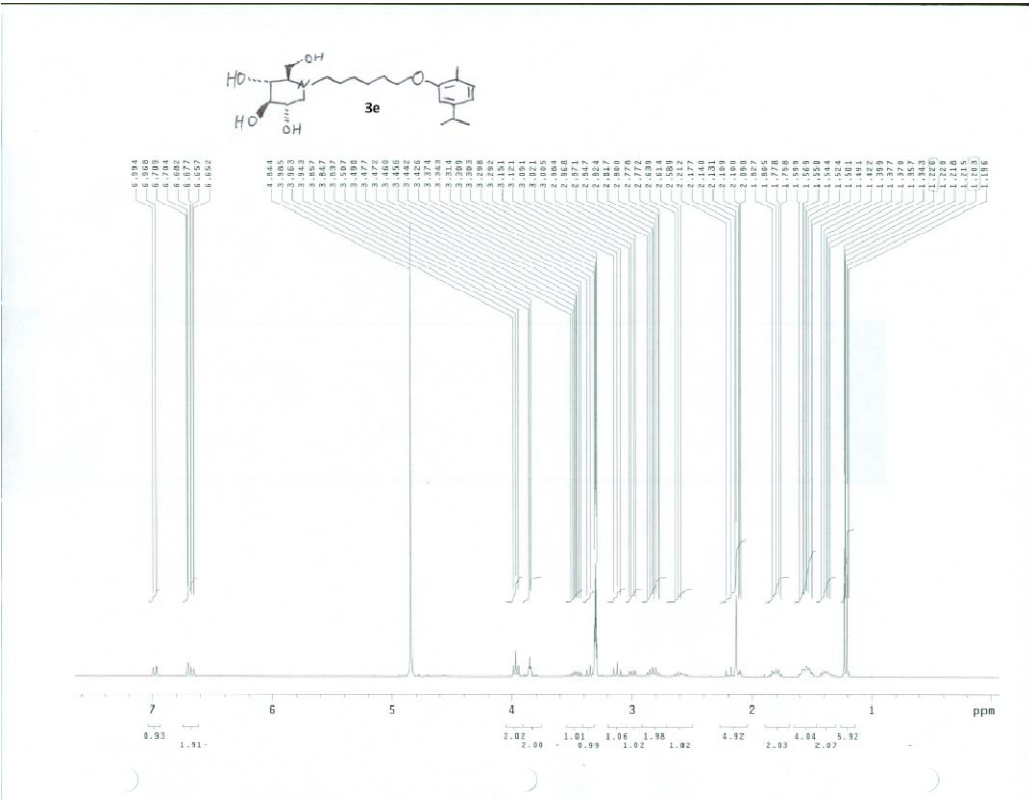

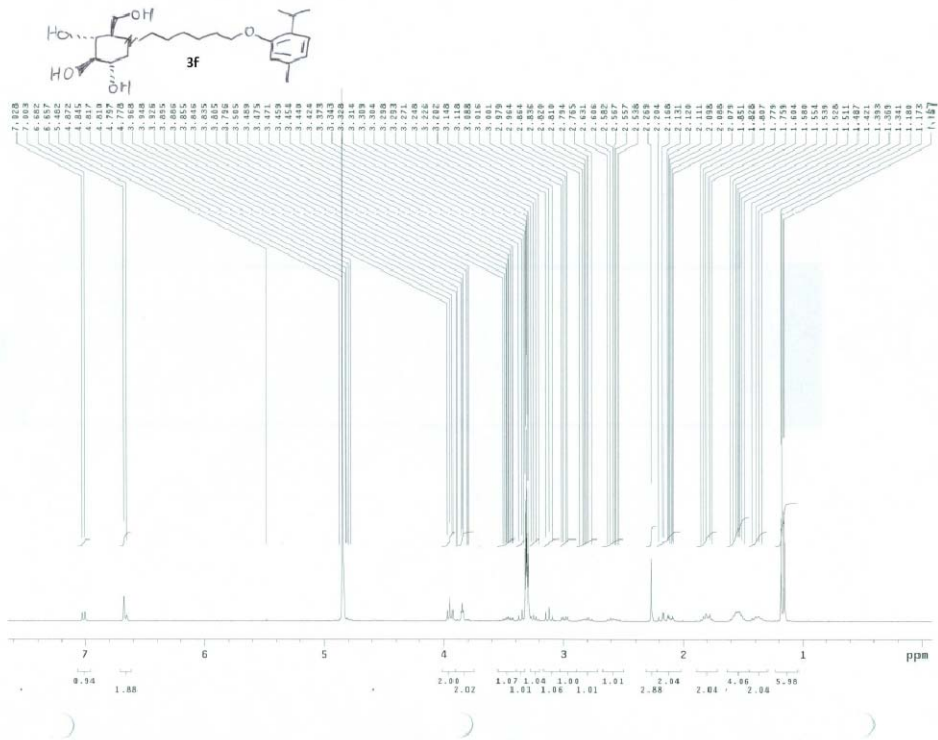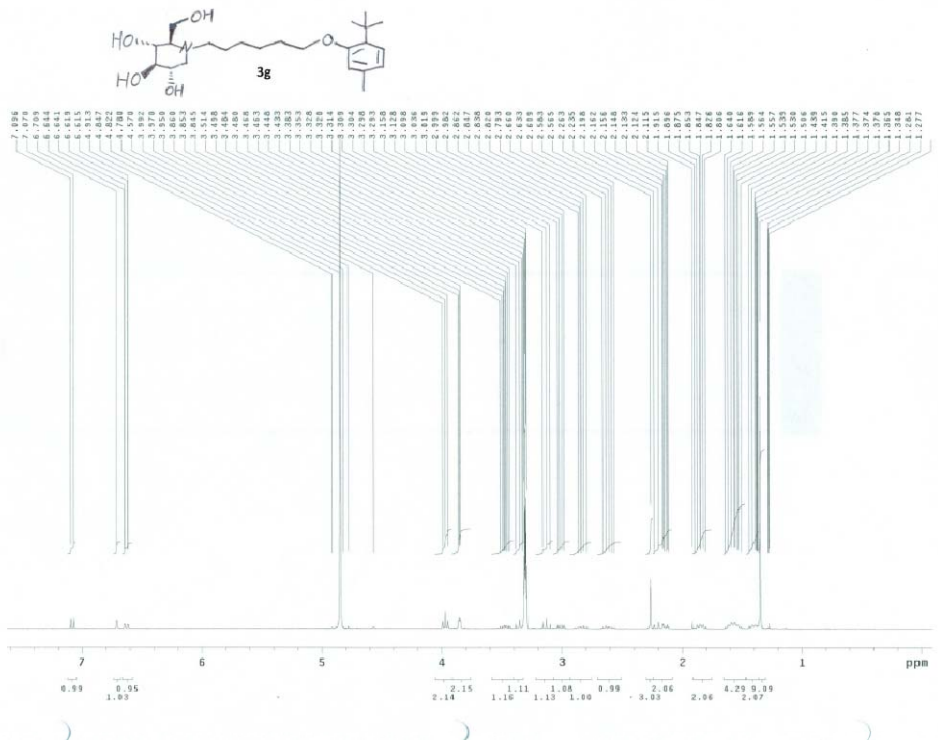

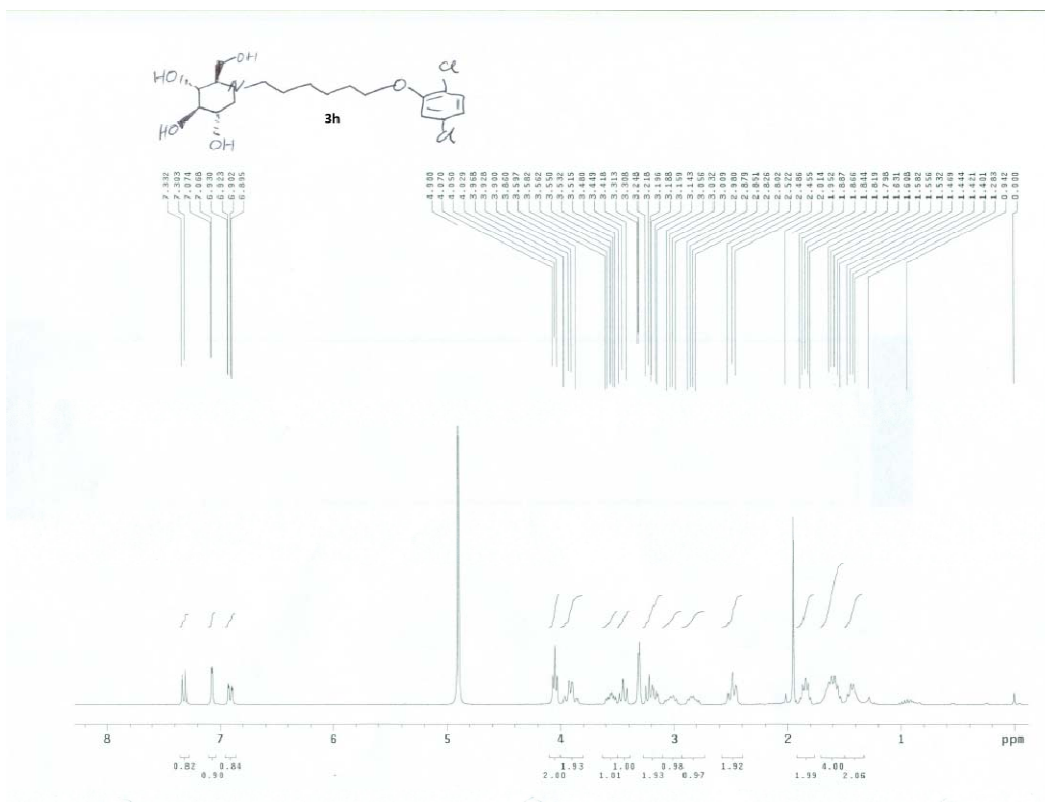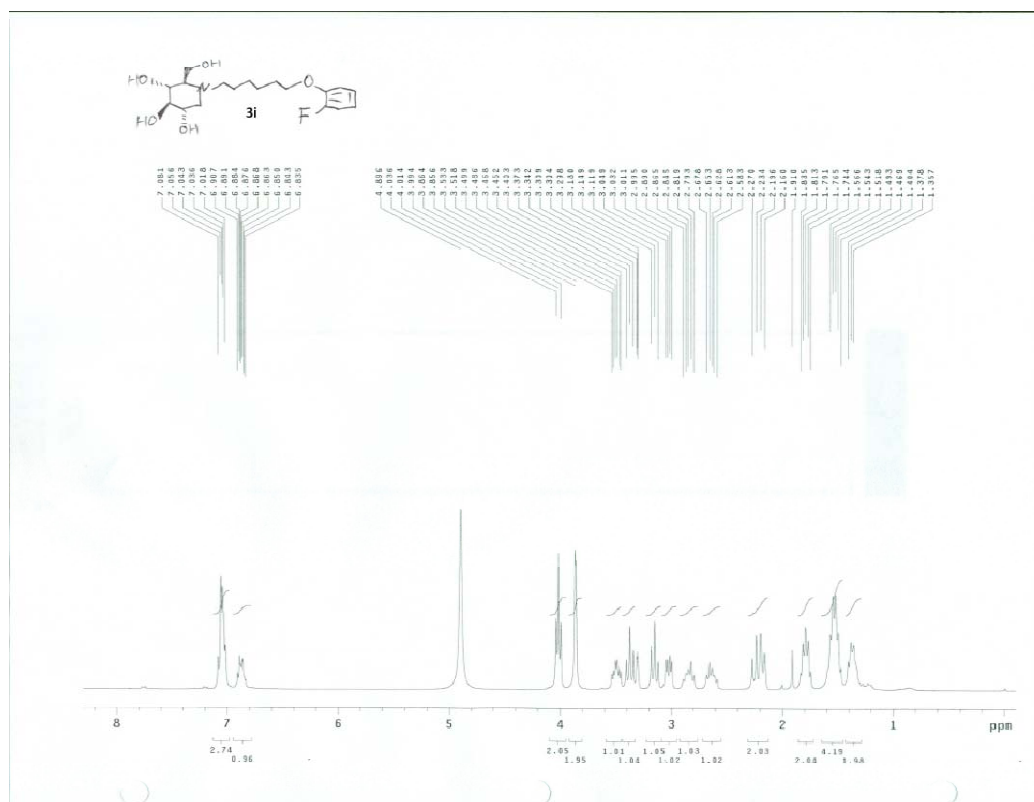



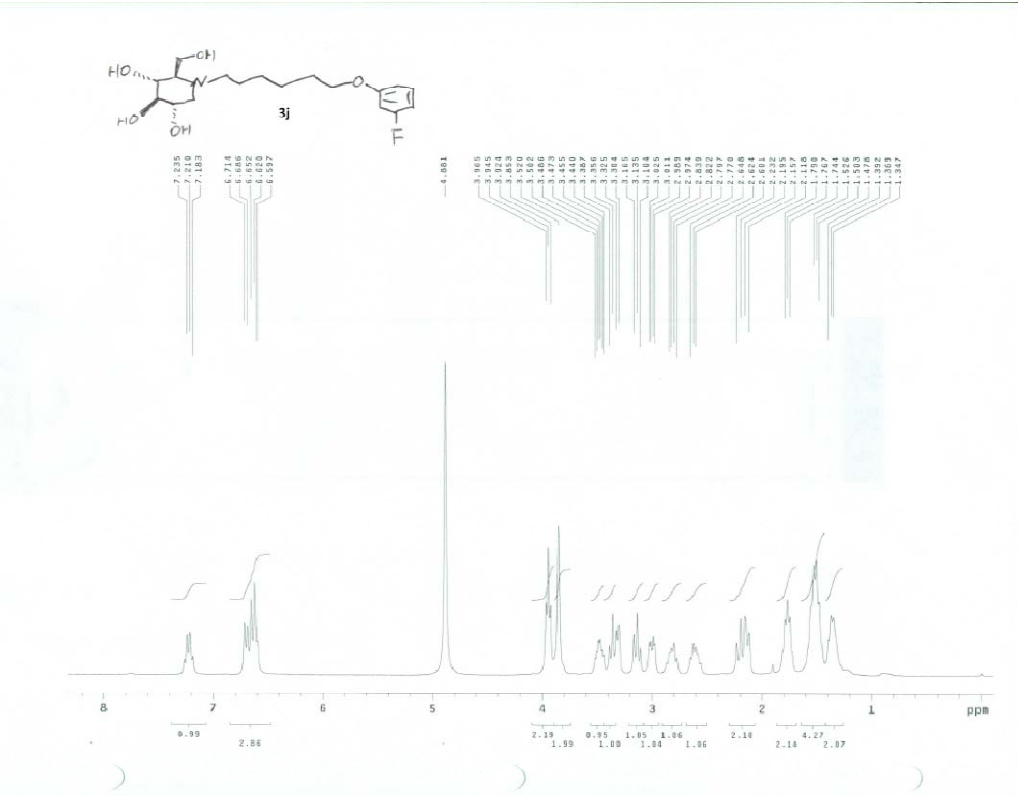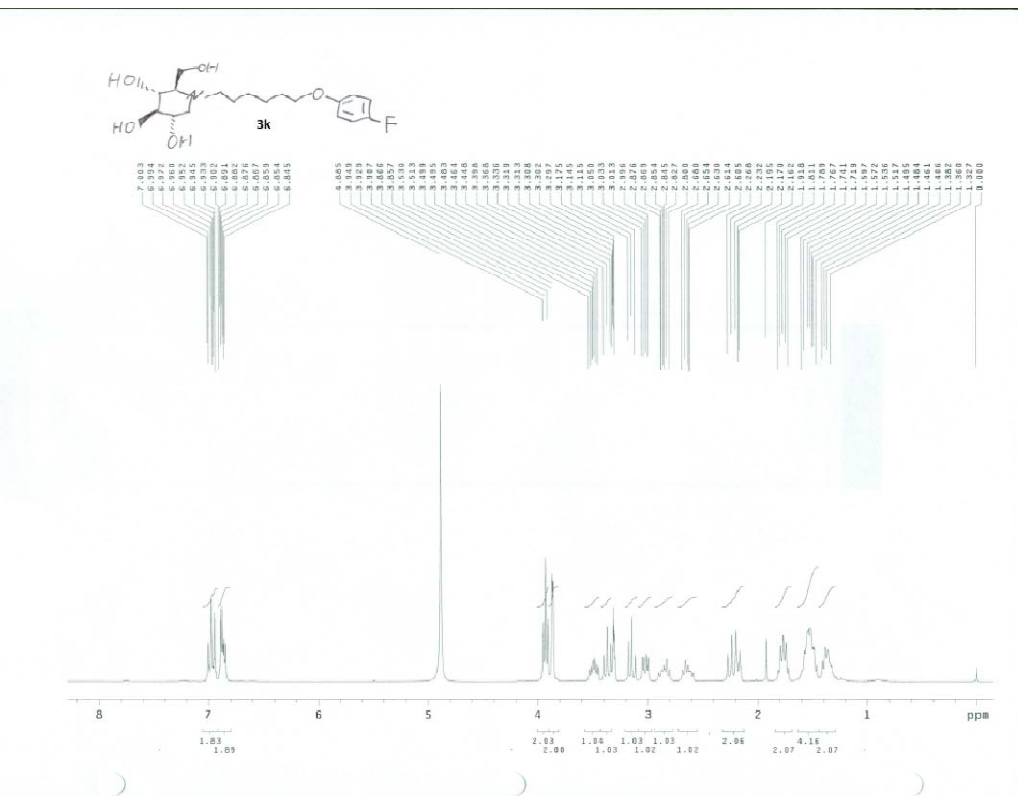



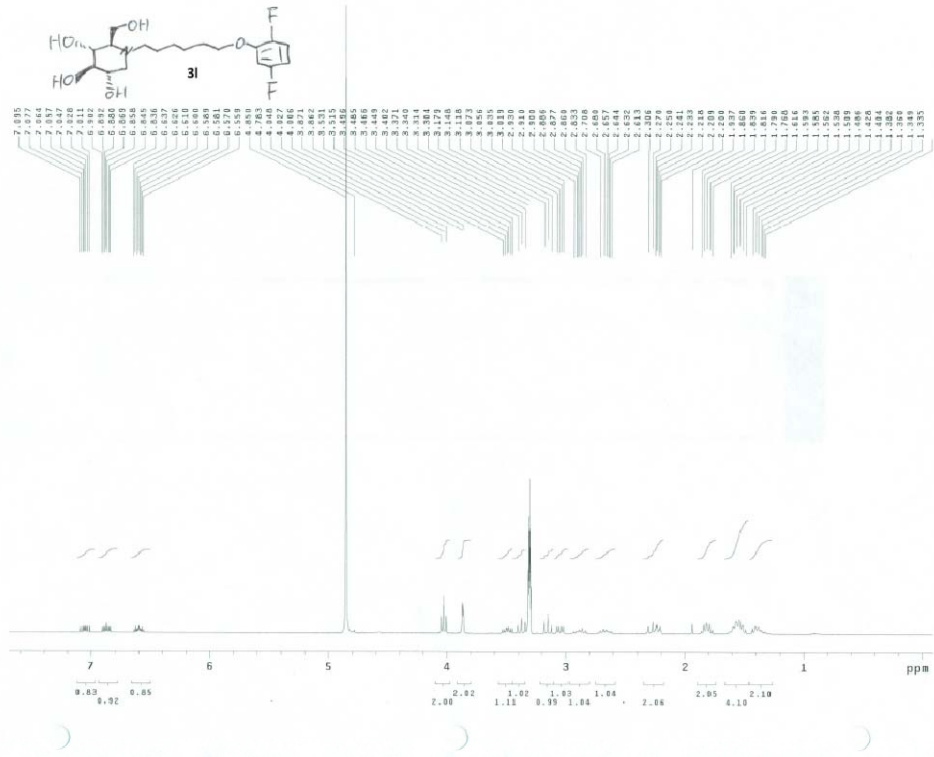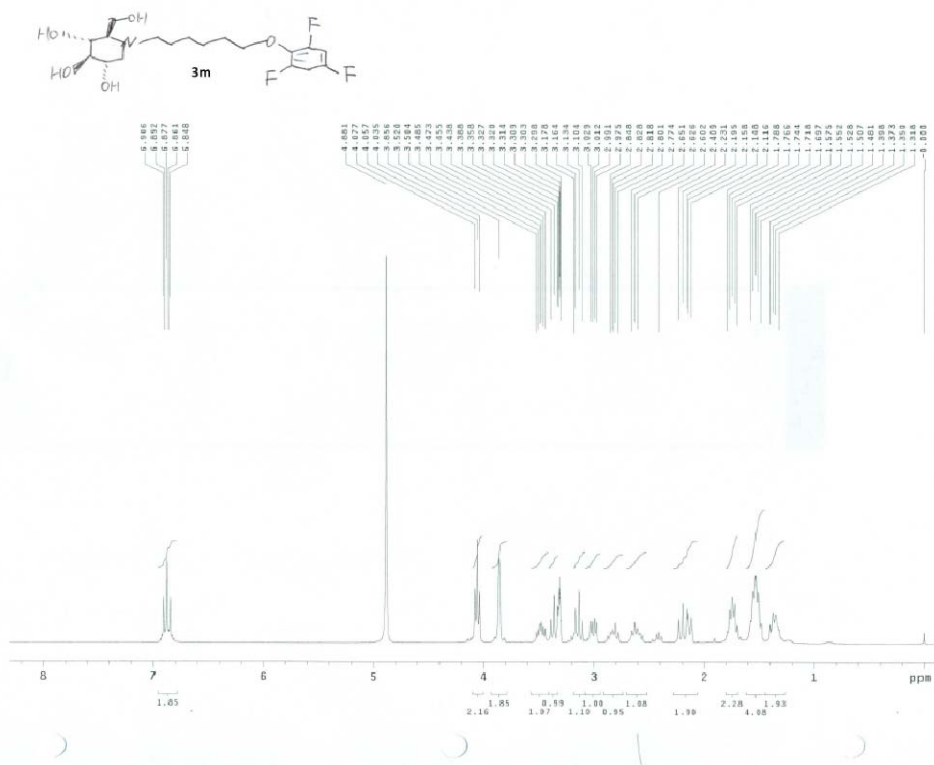

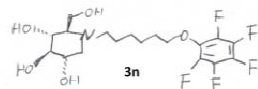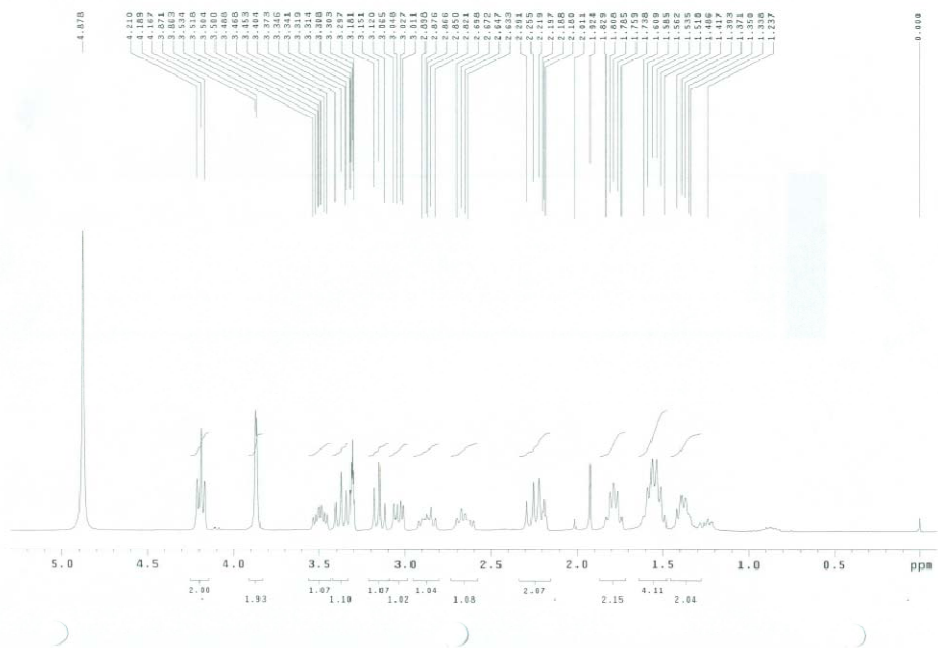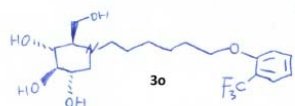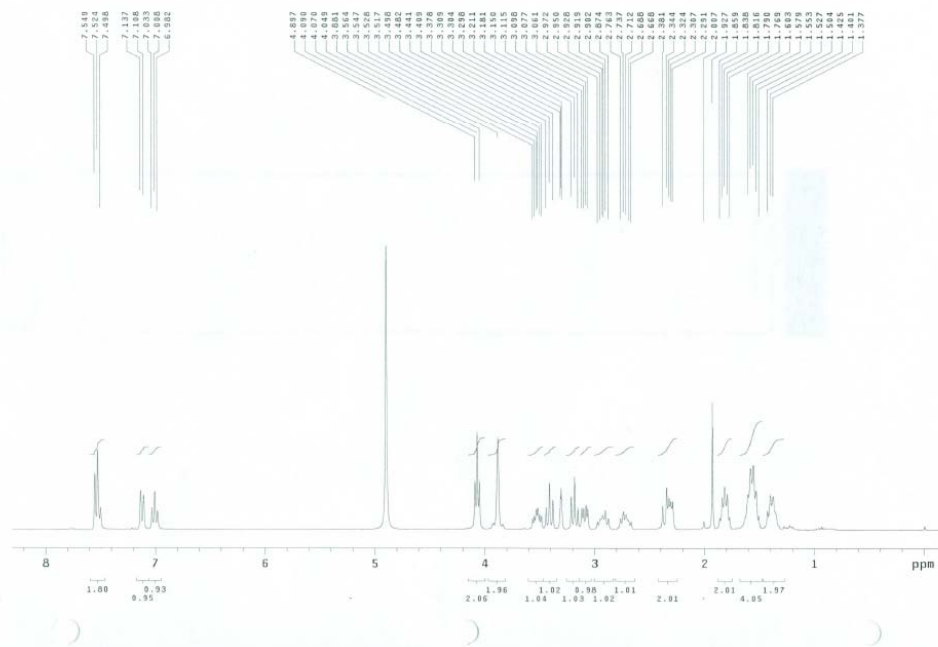

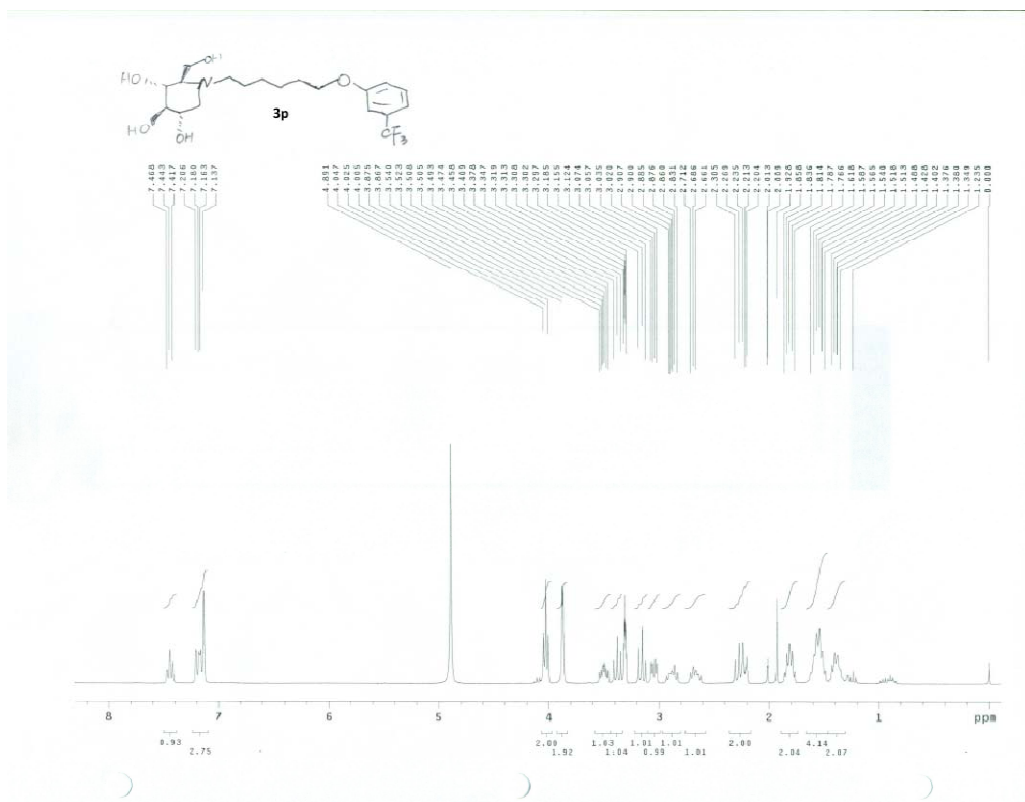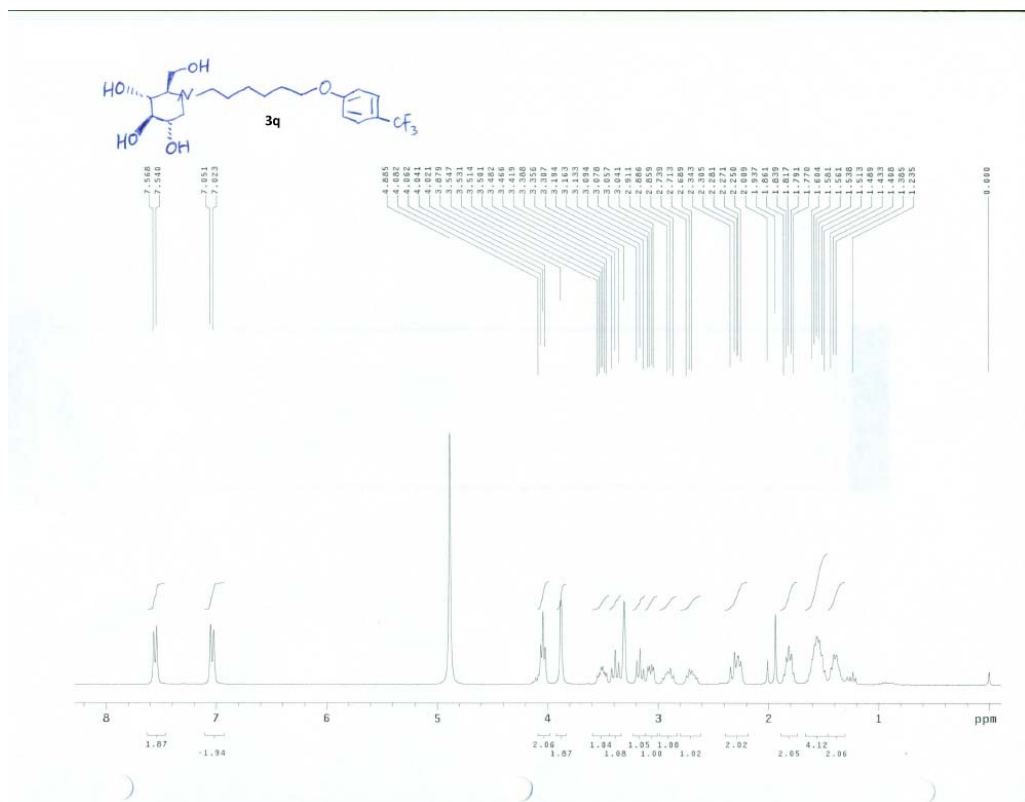

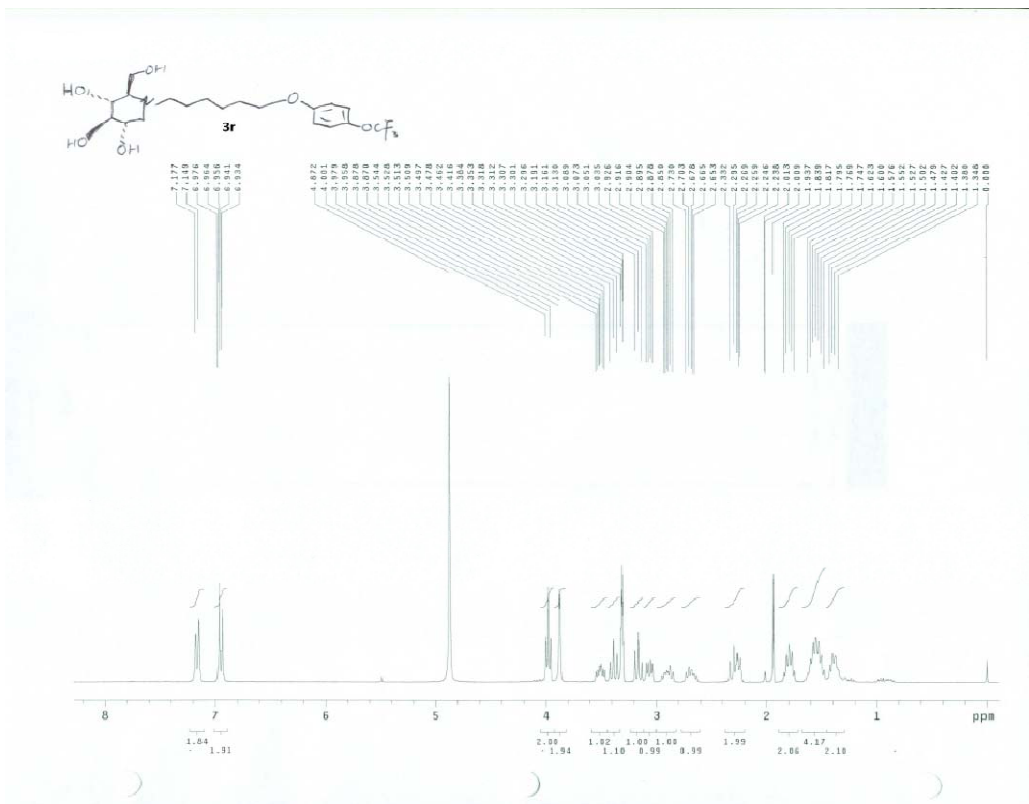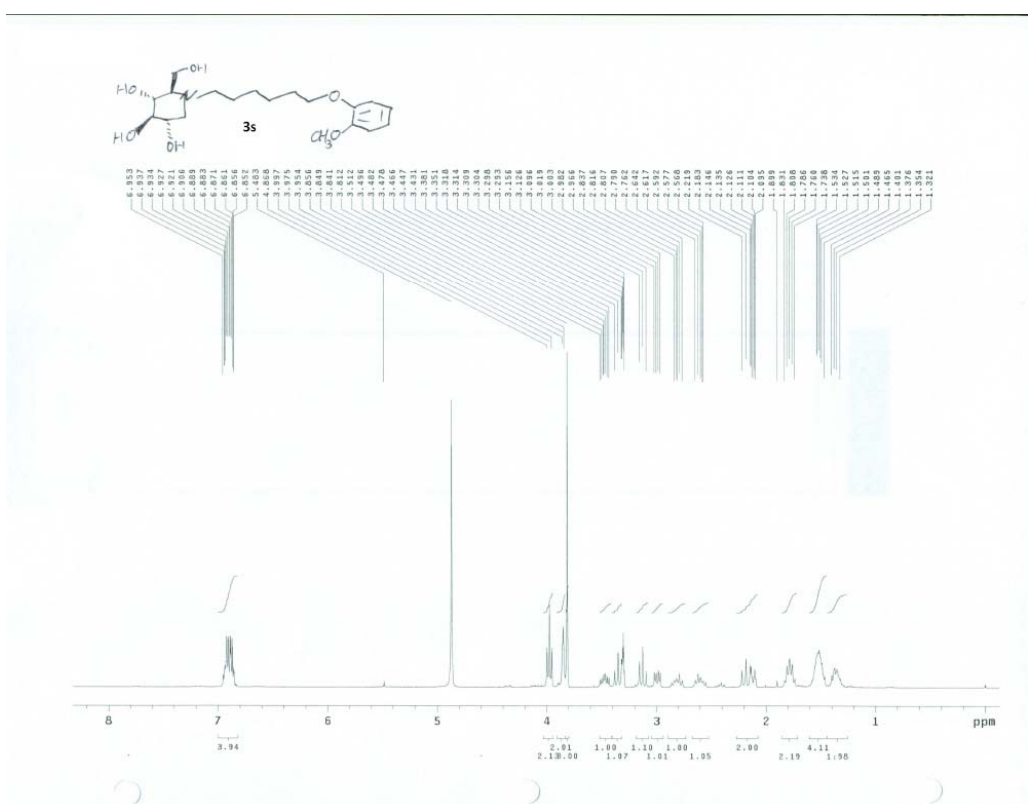

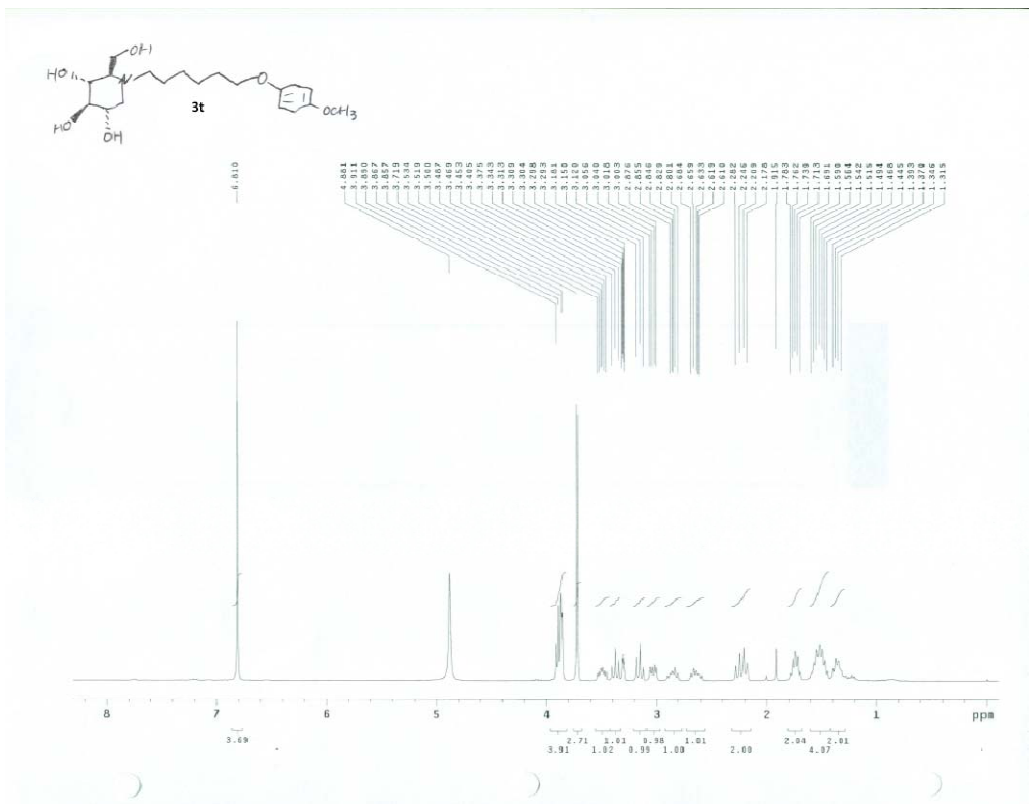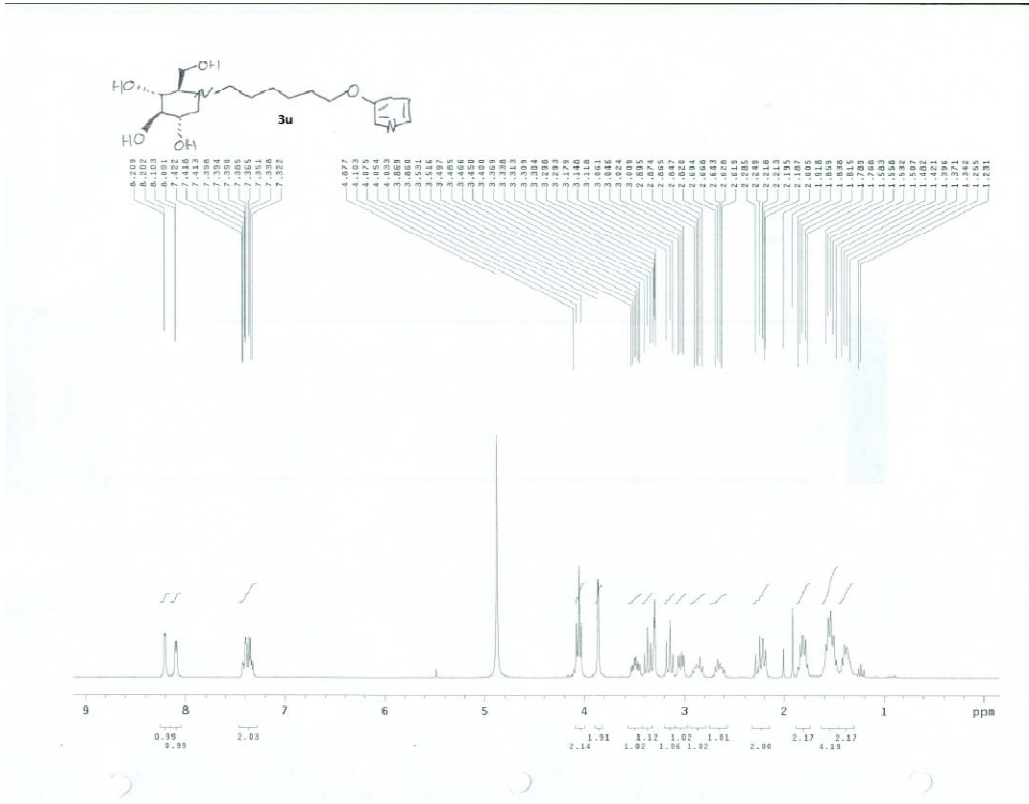

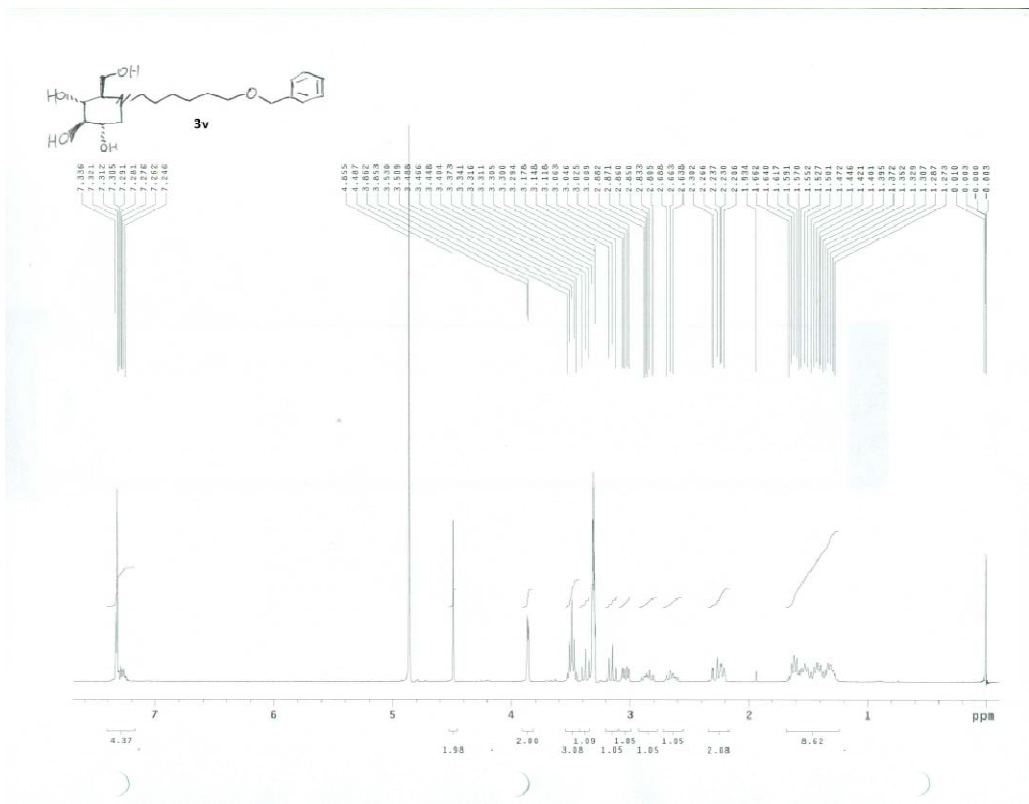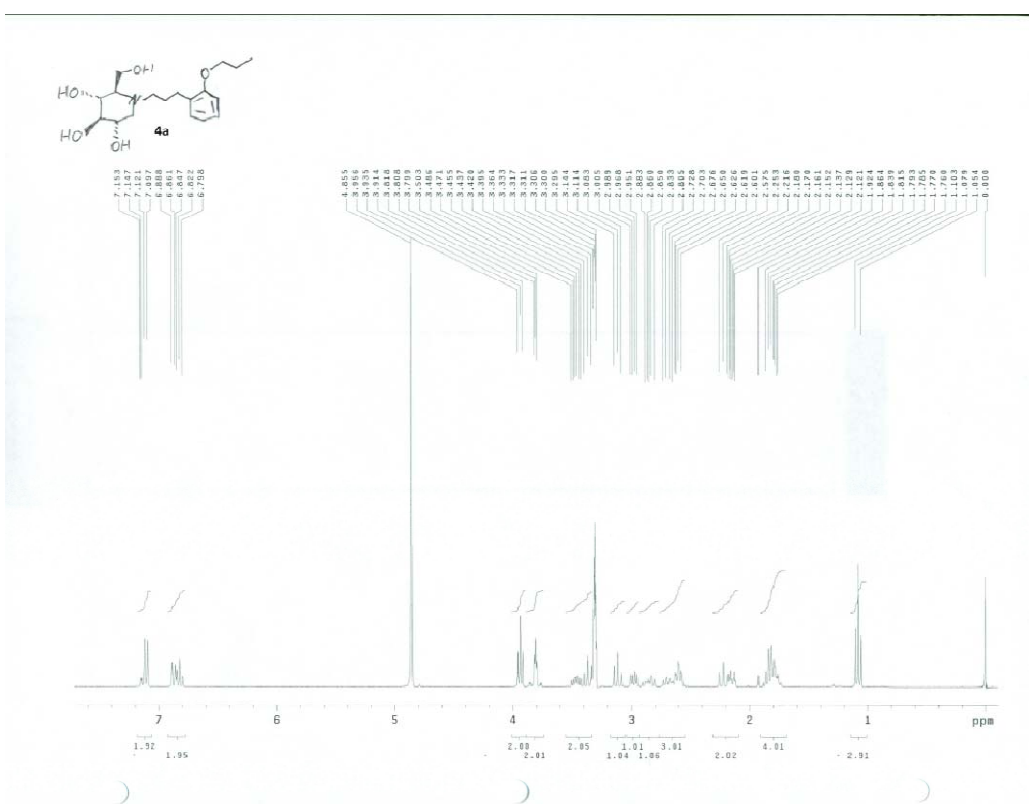

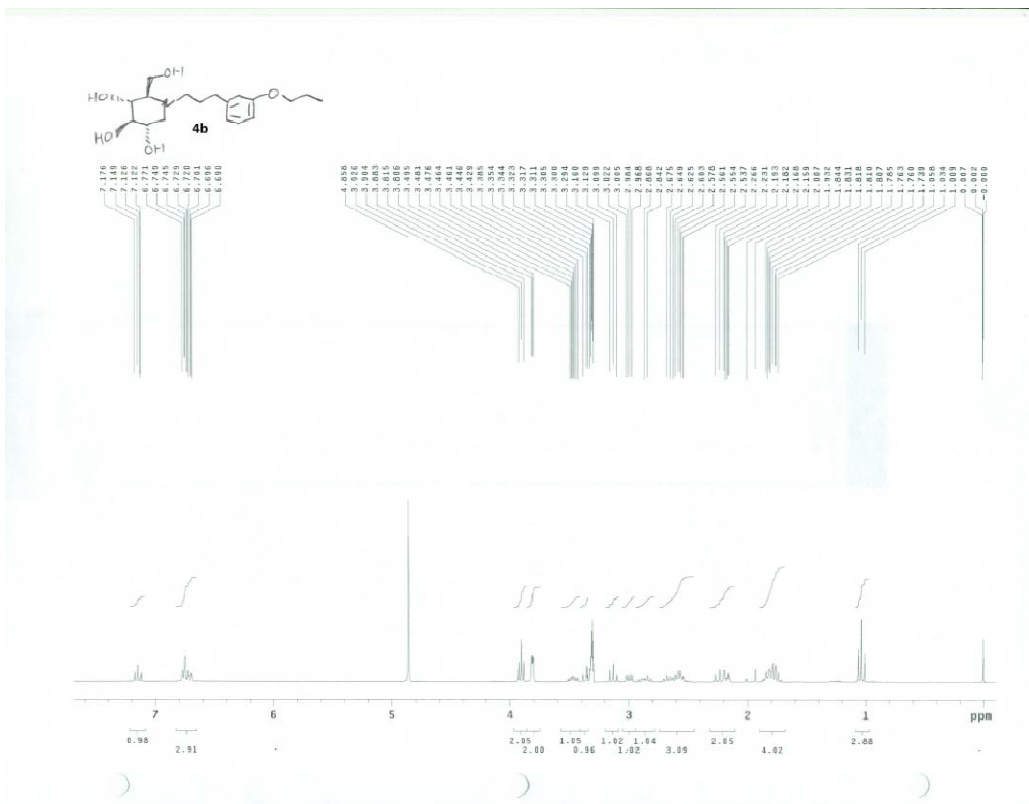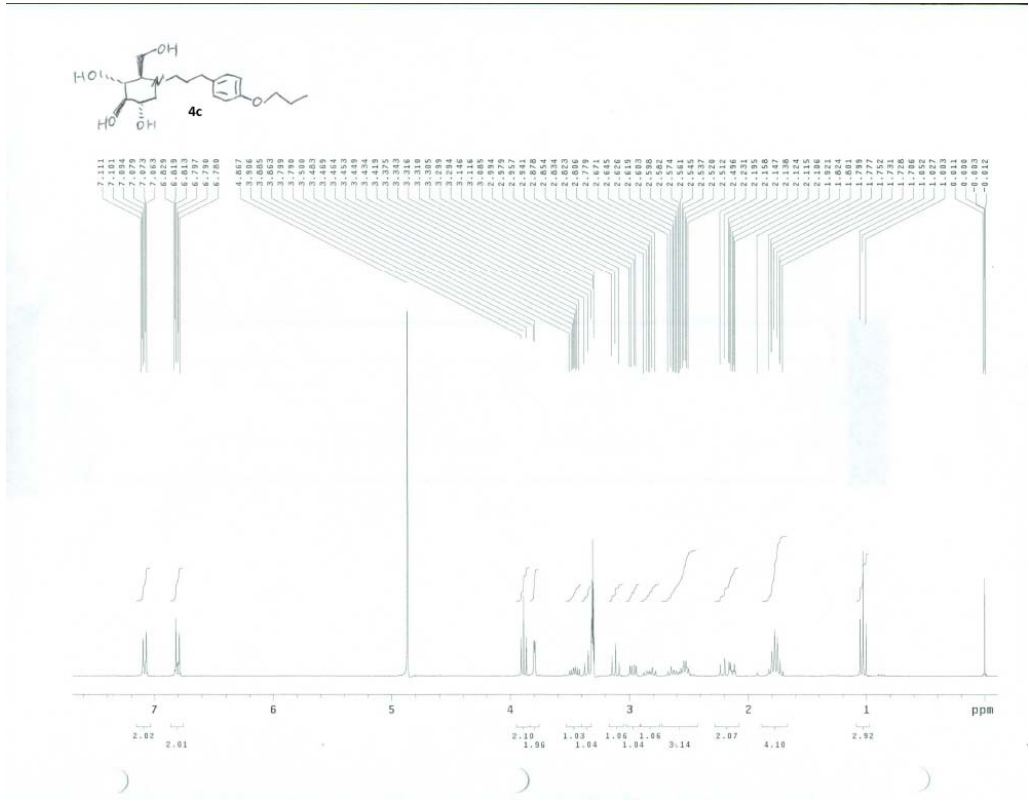



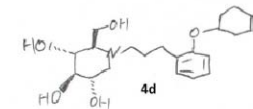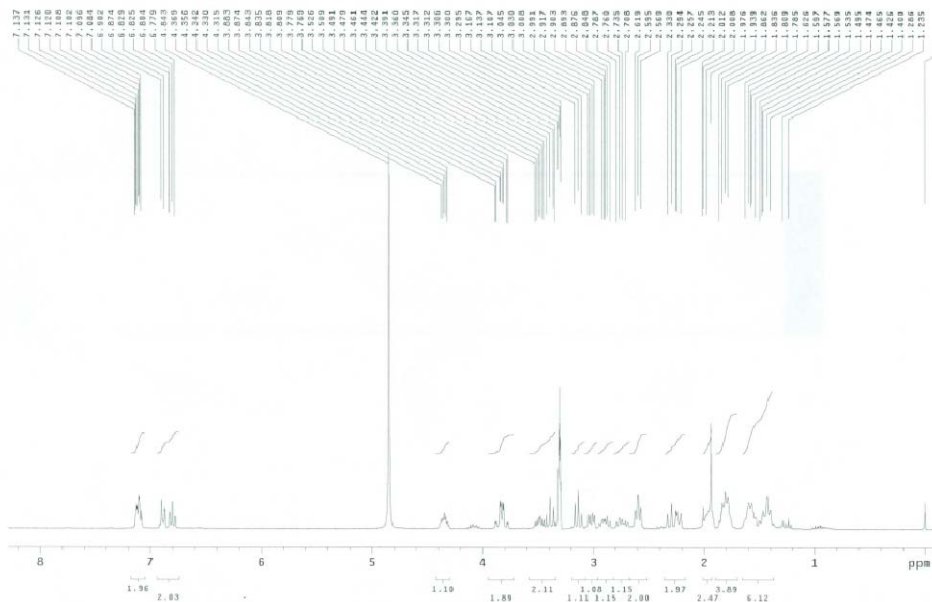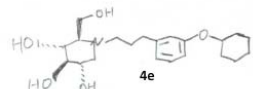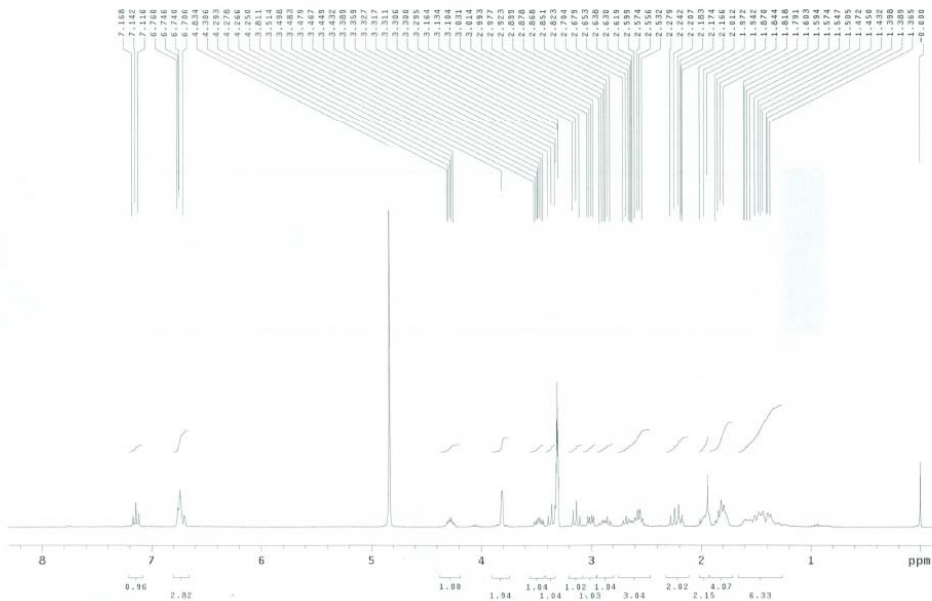



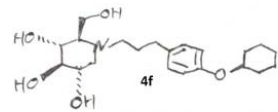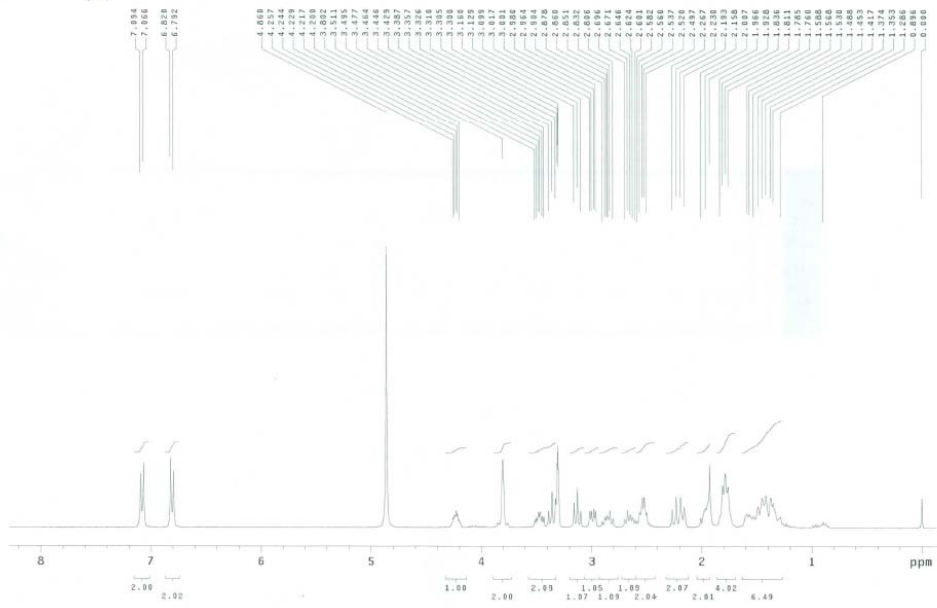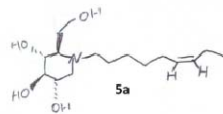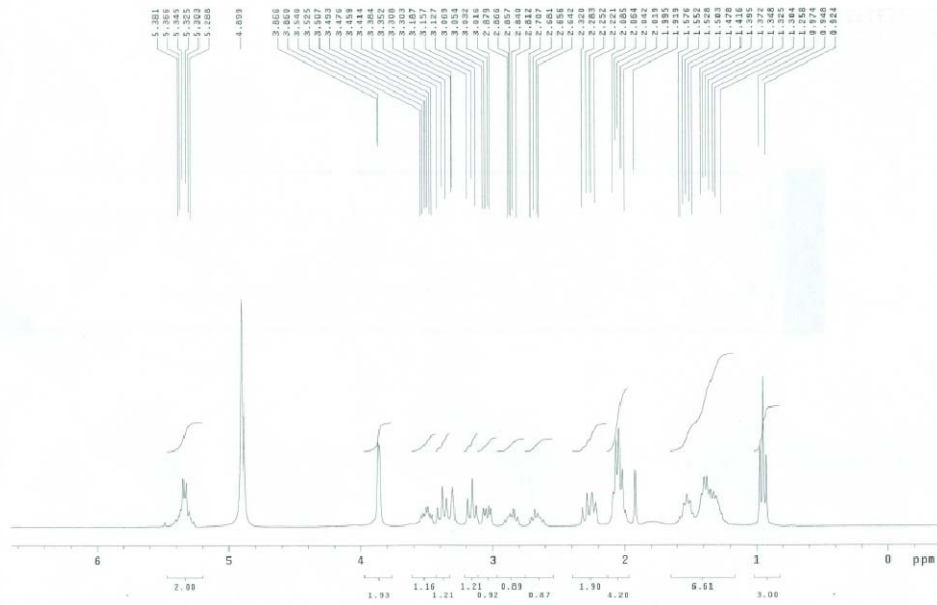

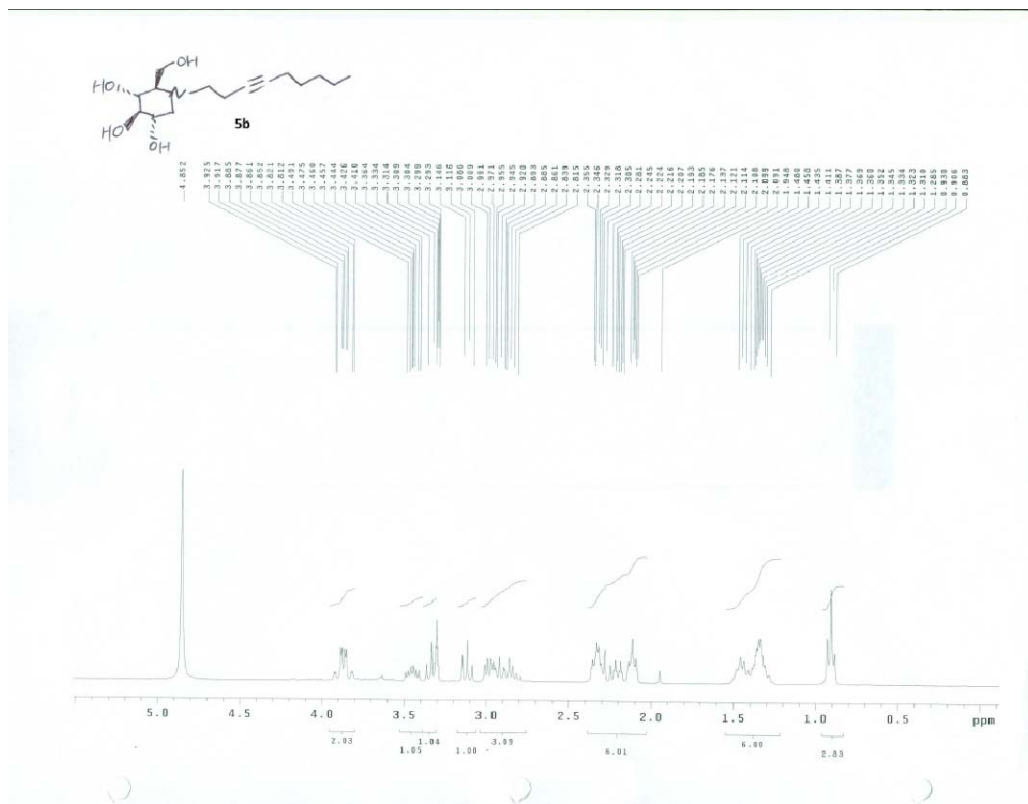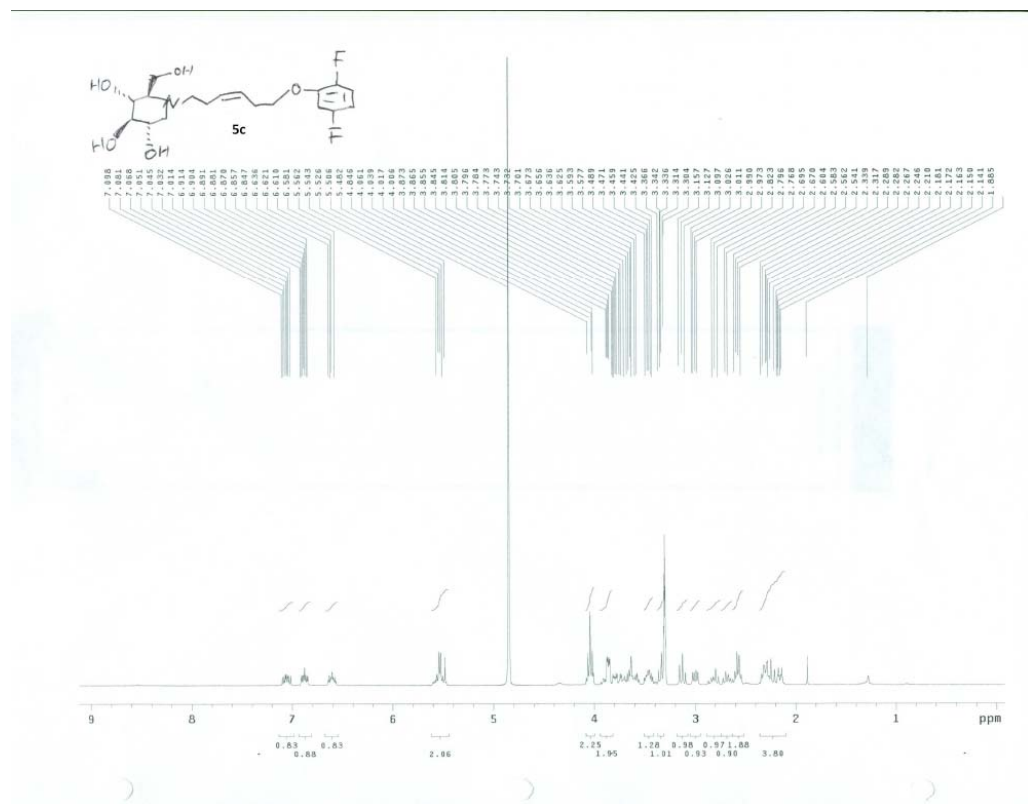

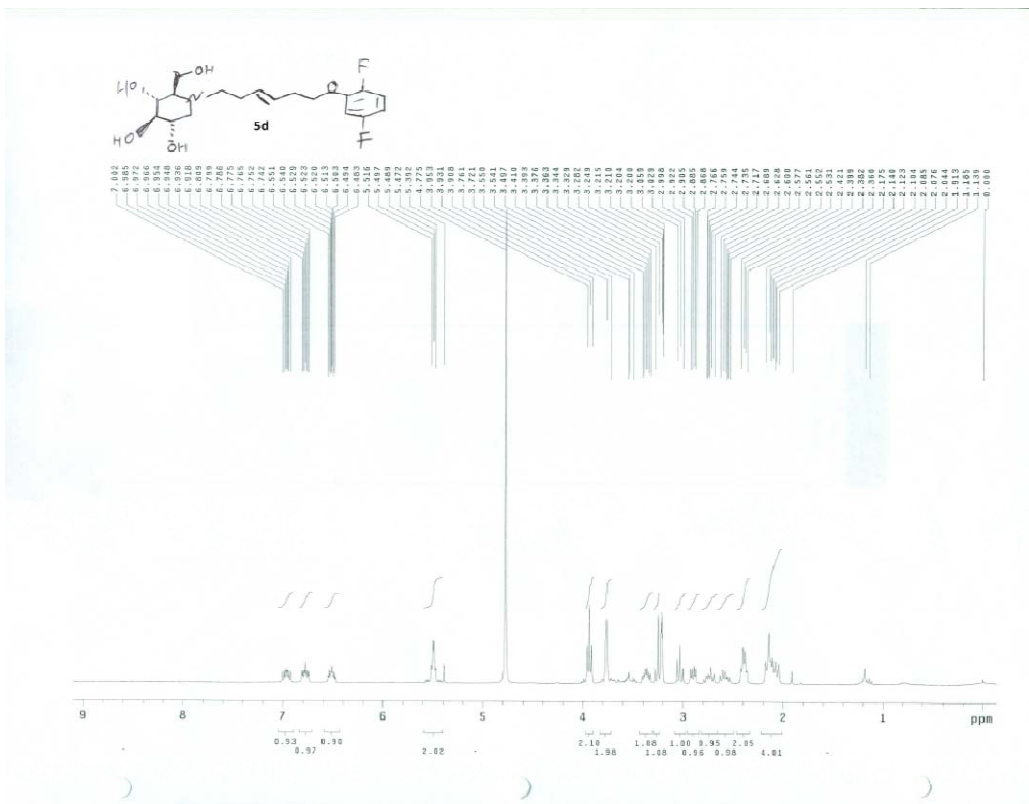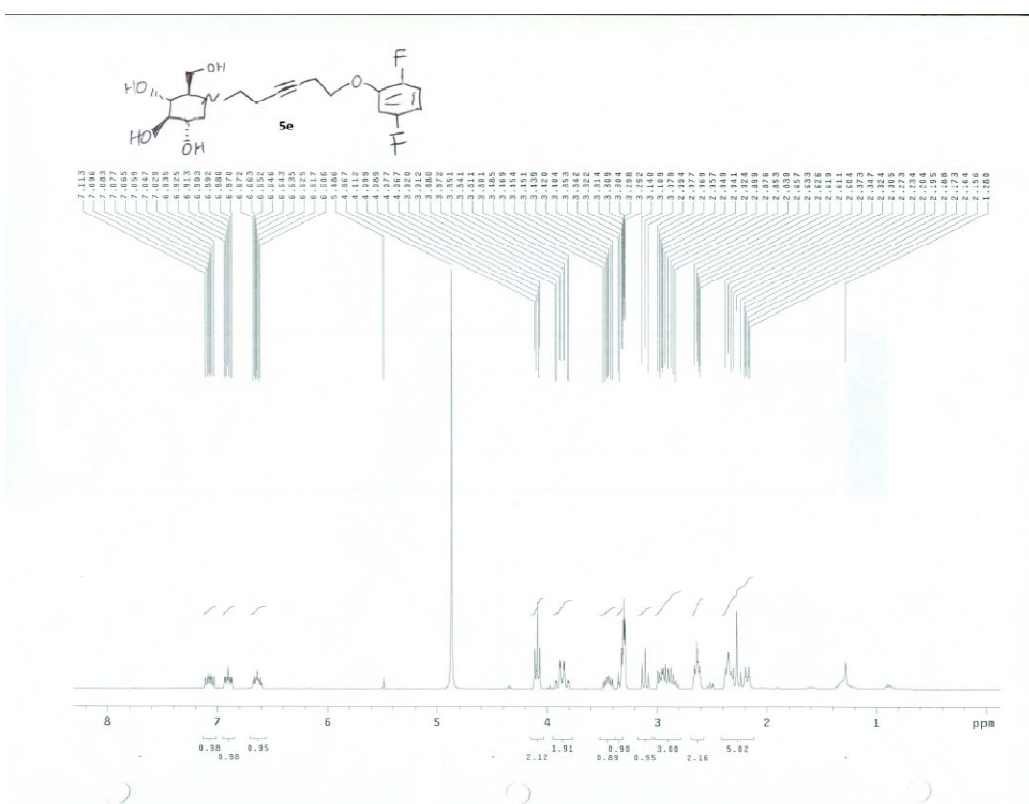

### 3. X-ray Structure and Data of 3I

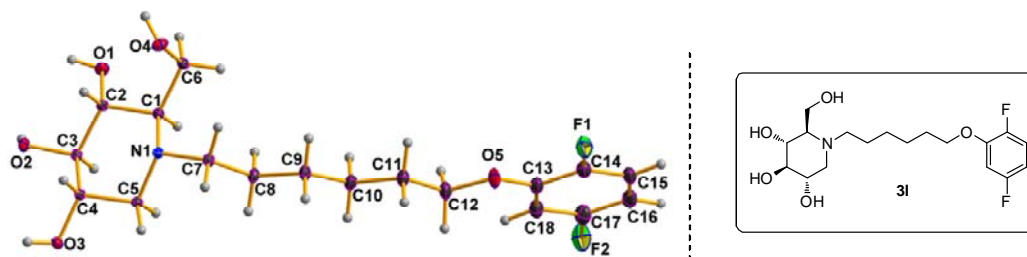

Table 1. Crystal data and structure refinement for 11mxulh.

|                                 |                                                                 |                                                                |
|---------------------------------|-----------------------------------------------------------------|----------------------------------------------------------------|
| Identification code             | 11mxulh                                                         |                                                                |
| Empirical formula               | C <sub>18</sub> H <sub>27</sub> F <sub>2</sub> N O <sub>5</sub> |                                                                |
| Formula weight                  | 375.41                                                          |                                                                |
| Temperature                     | 100(2) K                                                        |                                                                |
| Wavelength                      | 0.71073 Å                                                       |                                                                |
| Crystal system, space group     | Monoclinic, C2                                                  |                                                                |
| Unit cell dimensions            | a = 13.6384(5) Å<br>b = 7.1514(3) Å<br>c = 19.5985(8) Å         | alpha = 90 deg.<br>beta = 101.0480(10) deg.<br>gamma = 90 deg. |
| Volume                          | 1876.09(13) Å <sup>3</sup>                                      |                                                                |
| Z, Calculated density           | 4, 1.329 Mg/m <sup>3</sup>                                      |                                                                |
| Absorption coefficient          | 0.109 mm <sup>-1</sup>                                          |                                                                |
| F(000)                          | 800                                                             |                                                                |
| Crystal size                    | 0.56 x 0.54 x 0.24 mm                                           |                                                                |
| Theta range for data collection | 2.12 to 28.74 deg.                                              |                                                                |
| Limiting indices                | -18<=h<=18, -9<=k<=9, -26<=l<=26                                |                                                                |
| Reflections collected / unique  | 17793 / 2611 [R(int) = 0.0218]                                  |                                                                |
| Completeness to theta = 28.74   | 99.2 %                                                          |                                                                |
| Absorption correction           | Semi-empirical from equivalents                                 |                                                                |
| Max. and min. transmission      | 0.9744 and 0.9417                                               |                                                                |
| Refinement method               | Full-matrix least-squares on F <sup>2</sup>                     |                                                                |

Data / restraints / parameters      2611 / 5 / 247

Goodness-of-fit on F<sup>2</sup>                      1.061

Final R indices [I>2σ(I)]              R1 = 0.0263, wR2 = 0.0719

R indices (all data)                      R1 = 0.0276, wR2 = 0.0729

Largest diff. peak and hole              0.253 and -0.150 e.Å<sup>-3</sup>

Table 2. Atomic coordinates ( $\times 10^4$ ) and equivalent isotropic displacement parameters ( $\text{Å}^2 \times 10^3$ ) for 11mxulh. U(eq) is defined as one third of the trace of the orthogonalized U<sub>ij</sub> tensor.

|        | x        | y         | z        | U (eq) |
|--------|----------|-----------|----------|--------|
| F (1)  | 4099 (1) | 16693 (1) | 5646 (1) | 29 (1) |
| F (2)  | 3961 (1) | 10318 (2) | 7119 (1) | 35 (1) |
| O (1)  | 5524 (1) | 4168 (1)  | 1028 (1) | 13 (1) |
| O (2)  | 3929 (1) | 2168 (1)  | 191 (1)  | 12 (1) |
| O (3)  | 1927 (1) | 3080 (1)  | 404 (1)  | 12 (1) |
| O (4)  | 5126 (1) | 9063 (1)  | 759 (1)  | 14 (1) |
| O (5)  | 3661 (1) | 13524 (2) | 4950 (1) | 22 (1) |
| N (1)  | 3383 (1) | 7254 (2)  | 1083 (1) | 10 (1) |
| C (1)  | 4400 (1) | 6484 (2)  | 1319 (1) | 10 (1) |
| C (2)  | 4562 (1) | 4981 (2)  | 798 (1)  | 10 (1) |
| C (3)  | 3757 (1) | 3465 (2)  | 710 (1)  | 10 (1) |
| C (4)  | 2740 (1) | 4383 (2)  | 497 (1)  | 9 (1)  |
| C (5)  | 2625 (1) | 5778 (2)  | 1065 (1) | 10 (1) |
| C (6)  | 5204 (1) | 7999 (2)  | 1386 (1) | 12 (1) |
| C (7)  | 3165 (1) | 8907 (2)  | 1482 (1) | 11 (1) |
| C (8)  | 3255 (1) | 8636 (2)  | 2268 (1) | 14 (1) |
| C (9)  | 3190 (1) | 10502 (2) | 2636 (1) | 16 (1) |
| C (10) | 3386 (1) | 10277 (2) | 3426 (1) | 17 (1) |
| C (11) | 3364 (1) | 12134 (2) | 3813 (1) | 19 (1) |
| C (12) | 3517 (1) | 11764 (2) | 4588 (1) | 20 (1) |
| C (13) | 3846 (1) | 13427 (2) | 5656 (1) | 19 (1) |
| C (14) | 4075 (1) | 15107 (2) | 6017 (1) | 20 (1) |
| C (15) | 4261 (1) | 15191 (2) | 6734 (1) | 22 (1) |
| C (16) | 4228 (1) | 13573 (2) | 7120 (1) | 24 (1) |
| C (17) | 4004 (1) | 11928 (2) | 6760 (1) | 23 (1) |
| C (18) | 3813 (1) | 11802 (2) | 6038 (1) | 21 (1) |

Table 3. Bond lengths [Å] and angles [deg] for 11mxulh.

---

|              |            |
|--------------|------------|
| F(1)-C(14)   | 1.3500(19) |
| F(2)-C(17)   | 1.3558(19) |
| O(1)-C(2)    | 1.4270(14) |
| O(1)-H(10)   | 0.832(9)   |
| O(2)-C(3)    | 1.4291(14) |
| O(2)-H(20)   | 0.833(9)   |
| O(3)-C(4)    | 1.4329(14) |
| O(3)-H(30)   | 0.833(9)   |
| O(4)-C(6)    | 1.4325(15) |
| O(4)-H(40)   | 0.843(9)   |
| O(5)-C(13)   | 1.3583(17) |
| O(5)-C(12)   | 1.4400(17) |
| N(1)-C(5)    | 1.4728(15) |
| N(1)-C(7)    | 1.4789(15) |
| N(1)-C(1)    | 1.4813(15) |
| C(1)-C(2)    | 1.5273(16) |
| C(1)-C(6)    | 1.5293(17) |
| C(1)-H(1)    | 0.9500     |
| C(2)-C(3)    | 1.5286(17) |
| C(2)-H(2)    | 0.9500     |
| C(3)-C(4)    | 1.5189(16) |
| C(3)-H(3)    | 0.9500     |
| C(4)-C(5)    | 1.5255(16) |
| C(4)-H(4)    | 0.9500     |
| C(5)-H(5A)   | 0.9900     |
| C(5)-H(5B)   | 0.9900     |
| C(6)-H(6A)   | 0.9900     |
| C(6)-H(6B)   | 0.9900     |
| C(7)-C(8)    | 1.5337(17) |
| C(7)-H(7A)   | 0.9900     |
| C(7)-H(7B)   | 0.9900     |
| C(8)-C(9)    | 1.5280(18) |
| C(8)-H(8A)   | 0.9900     |
| C(8)-H(8B)   | 0.9900     |
| C(9)-C(10)   | 1.5271(18) |
| C(9)-H(9A)   | 0.9900     |
| C(9)-H(9B)   | 0.9900     |
| C(10)-C(11)  | 1.533(2)   |
| C(10)-H(10A) | 0.9900     |

|                 |             |
|-----------------|-------------|
| C (10) -H (10B) | 0.9900      |
| C (11) -C (12)  | 1.5166 (19) |
| C (11) -H (11A) | 0.9900      |
| C (11) -H (11B) | 0.9900      |
| C (12) -H (12A) | 0.9900      |
| C (12) -H (12B) | 0.9900      |
| C (13) -C (18)  | 1.389 (2)   |
| C (13) -C (14)  | 1.399 (2)   |
| C (14) -C (15)  | 1.381 (2)   |
| C (15) -C (16)  | 1.388 (2)   |
| C (15) -H (15)  | 0.9500      |
| C (16) -C (17)  | 1.376 (2)   |
| C (16) -H (16)  | 0.9500      |
| C (17) -C (18)  | 1.392 (2)   |
| C (18) -H (18)  | 0.9500      |

|                       |             |
|-----------------------|-------------|
| C (2) -O (1) -H (10)  | 109.5 (13)  |
| C (3) -O (2) -H (20)  | 108.9 (13)  |
| C (4) -O (3) -H (30)  | 106.1 (13)  |
| C (6) -O (4) -H (40)  | 107.2 (14)  |
| C (13) -O (5) -C (12) | 115.98 (12) |
| C (5) -N (1) -C (7)   | 111.96 (9)  |
| C (5) -N (1) -C (1)   | 110.59 (10) |
| C (7) -N (1) -C (1)   | 113.80 (9)  |
| N (1) -C (1) -C (2)   | 107.45 (9)  |
| N (1) -C (1) -C (6)   | 112.10 (10) |
| C (2) -C (1) -C (6)   | 111.30 (10) |
| N (1) -C (1) -H (1)   | 108.6       |
| C (2) -C (1) -H (1)   | 108.6       |
| C (6) -C (1) -H (1)   | 108.6       |
| O (1) -C (2) -C (1)   | 108.47 (9)  |
| O (1) -C (2) -C (3)   | 110.11 (10) |
| C (1) -C (2) -C (3)   | 112.45 (10) |
| O (1) -C (2) -H (2)   | 108.6       |
| C (1) -C (2) -H (2)   | 108.6       |
| C (3) -C (2) -H (2)   | 108.6       |
| O (2) -C (3) -C (4)   | 110.55 (10) |
| O (2) -C (3) -C (2)   | 109.16 (9)  |
| C (4) -C (3) -C (2)   | 108.82 (10) |
| O (2) -C (3) -H (3)   | 109.4       |
| C (4) -C (3) -H (3)   | 109.4       |
| C (2) -C (3) -H (3)   | 109.4       |
| O (3) -C (4) -C (3)   | 113.43 (10) |

|                     |             |
|---------------------|-------------|
| O(3)-C(4)-C(5)      | 109.43 (9)  |
| C(3)-C(4)-C(5)      | 107.34 (9)  |
| O(3)-C(4)-H(4)      | 108.8       |
| C(3)-C(4)-H(4)      | 108.8       |
| C(5)-C(4)-H(4)      | 108.8       |
| N(1)-C(5)-C(4)      | 108.46 (9)  |
| N(1)-C(5)-H(5A)     | 110.0       |
| C(4)-C(5)-H(5A)     | 110.0       |
| N(1)-C(5)-H(5B)     | 110.0       |
| C(4)-C(5)-H(5B)     | 110.0       |
| H(5A)-C(5)-H(5B)    | 108.4       |
| O(4)-C(6)-C(1)      | 111.64 (10) |
| O(4)-C(6)-H(6A)     | 109.3       |
| C(1)-C(6)-H(6A)     | 109.3       |
| O(4)-C(6)-H(6B)     | 109.3       |
| C(1)-C(6)-H(6B)     | 109.3       |
| H(6A)-C(6)-H(6B)    | 108.0       |
| N(1)-C(7)-C(8)      | 116.42 (10) |
| N(1)-C(7)-H(7A)     | 108.2       |
| C(8)-C(7)-H(7A)     | 108.2       |
| N(1)-C(7)-H(7B)     | 108.2       |
| C(8)-C(7)-H(7B)     | 108.2       |
| H(7A)-C(7)-H(7B)    | 107.3       |
| C(9)-C(8)-C(7)      | 111.29 (11) |
| C(9)-C(8)-H(8A)     | 109.4       |
| C(7)-C(8)-H(8A)     | 109.4       |
| C(9)-C(8)-H(8B)     | 109.4       |
| C(7)-C(8)-H(8B)     | 109.4       |
| H(8A)-C(8)-H(8B)    | 108.0       |
| C(10)-C(9)-C(8)     | 111.81 (12) |
| C(10)-C(9)-H(9A)    | 109.3       |
| C(8)-C(9)-H(9A)     | 109.3       |
| C(10)-C(9)-H(9B)    | 109.3       |
| C(8)-C(9)-H(9B)     | 109.3       |
| H(9A)-C(9)-H(9B)    | 107.9       |
| C(9)-C(10)-C(11)    | 113.22 (12) |
| C(9)-C(10)-H(10A)   | 108.9       |
| C(11)-C(10)-H(10A)  | 108.9       |
| C(9)-C(10)-H(10B)   | 108.9       |
| C(11)-C(10)-H(10B)  | 108.9       |
| H(10A)-C(10)-H(10B) | 107.7       |
| C(12)-C(11)-C(10)   | 109.46 (12) |
| C(12)-C(11)-H(11A)  | 109.8       |



|                     |            |
|---------------------|------------|
| C(10)-C(11)-H(11A)  | 109.8      |
| C(12)-C(11)-H(11B)  | 109.8      |
| C(10)-C(11)-H(11B)  | 109.8      |
| H(11A)-C(11)-H(11B) | 108.2      |
| O(5)-C(12)-C(11)    | 108.69(12) |
| O(5)-C(12)-H(12A)   | 110.0      |
| C(11)-C(12)-H(12A)  | 110.0      |
| O(5)-C(12)-H(12B)   | 110.0      |
| C(11)-C(12)-H(12B)  | 110.0      |
| H(12A)-C(12)-H(12B) | 108.3      |
| O(5)-C(13)-C(18)    | 124.98(13) |
| O(5)-C(13)-C(14)    | 116.83(14) |
| C(18)-C(13)-C(14)   | 118.18(13) |
| F(1)-C(14)-C(15)    | 119.47(14) |
| F(1)-C(14)-C(13)    | 118.36(12) |
| C(15)-C(14)-C(13)   | 122.16(15) |
| C(14)-C(15)-C(16)   | 120.00(15) |
| C(14)-C(15)-H(15)   | 120.0      |
| C(16)-C(15)-H(15)   | 120.0      |
| C(17)-C(16)-C(15)   | 117.42(13) |
| C(17)-C(16)-H(16)   | 121.3      |
| C(15)-C(16)-H(16)   | 121.3      |
| F(2)-C(17)-C(16)    | 119.20(13) |
| F(2)-C(17)-C(18)    | 117.01(14) |
| C(16)-C(17)-C(18)   | 123.79(15) |
| C(13)-C(18)-C(17)   | 118.44(14) |
| C(13)-C(18)-H(18)   | 120.8      |
| C(17)-C(18)-H(18)   | 120.8      |

---

Symmetry transformations used to generate equivalent atoms:

Table 4. Anisotropic displacement parameters ( $\text{\AA}^2 \times 10^3$ ) for 11mxulh.  
 The anisotropic displacement factor exponent takes the form:  
 $-2 \pi^2 [ h^2 a^{*2} U_{11} + \dots + 2 h k a^* b^* U_{12} ]$

|        | U11    | U22    | U33    | U23     | U13    | U12    |
|--------|--------|--------|--------|---------|--------|--------|
| F (1)  | 40 (1) | 23 (1) | 24 (1) | -4 (1)  | 6 (1)  | -6 (1) |
| F (2)  | 50 (1) | 30 (1) | 21 (1) | 5 (1)   | -1 (1) | 2 (1)  |
| O (1)  | 9 (1)  | 14 (1) | 17 (1) | -2 (1)  | 1 (1)  | 3 (1)  |
| O (2)  | 12 (1) | 9 (1)  | 14 (1) | -4 (1)  | 3 (1)  | 2 (1)  |
| O (3)  | 10 (1) | 11 (1) | 14 (1) | -2 (1)  | 2 (1)  | -2 (1) |
| O (4)  | 12 (1) | 12 (1) | 18 (1) | 3 (1)   | 7 (1)  | 1 (1)  |
| O (5)  | 32 (1) | 21 (1) | 12 (1) | -6 (1)  | 3 (1)  | -2 (1) |
| N (1)  | 9 (1)  | 8 (1)  | 11 (1) | -1 (1)  | 3 (1)  | 0 (1)  |
| C (1)  | 9 (1)  | 10 (1) | 9 (1)  | -1 (1)  | 2 (1)  | 0 (1)  |
| C (2)  | 7 (1)  | 10 (1) | 11 (1) | -1 (1)  | 2 (1)  | 1 (1)  |
| C (3)  | 11 (1) | 8 (1)  | 11 (1) | -1 (1)  | 3 (1)  | 0 (1)  |
| C (4)  | 9 (1)  | 8 (1)  | 12 (1) | -1 (1)  | 3 (1)  | -1 (1) |
| C (5)  | 10 (1) | 10 (1) | 12 (1) | -1 (1)  | 3 (1)  | -1 (1) |
| C (6)  | 11 (1) | 12 (1) | 13 (1) | -1 (1)  | 1 (1)  | -2 (1) |
| C (7)  | 13 (1) | 9 (1)  | 12 (1) | -2 (1)  | 4 (1)  | 0 (1)  |
| C (8)  | 18 (1) | 14 (1) | 12 (1) | -2 (1)  | 5 (1)  | 0 (1)  |
| C (9)  | 19 (1) | 15 (1) | 14 (1) | -5 (1)  | 5 (1)  | 0 (1)  |
| C (10) | 18 (1) | 20 (1) | 15 (1) | -6 (1)  | 4 (1)  | 1 (1)  |
| C (11) | 22 (1) | 22 (1) | 14 (1) | -6 (1)  | 4 (1)  | -1 (1) |
| C (12) | 23 (1) | 20 (1) | 15 (1) | -7 (1)  | 2 (1)  | -1 (1) |
| C (13) | 18 (1) | 24 (1) | 14 (1) | -5 (1)  | 2 (1)  | 0 (1)  |
| C (14) | 20 (1) | 23 (1) | 18 (1) | -5 (1)  | 4 (1)  | -2 (1) |
| C (15) | 19 (1) | 28 (1) | 19 (1) | -10 (1) | 1 (1)  | -2 (1) |
| C (16) | 20 (1) | 35 (1) | 15 (1) | -6 (1)  | 0 (1)  | 2 (1)  |
| C (17) | 24 (1) | 26 (1) | 17 (1) | 1 (1)   | 0 (1)  | 4 (1)  |
| C (18) | 23 (1) | 23 (1) | 17 (1) | -5 (1)  | 1 (1)  | 2 (1)  |

Table 5. Hydrogen coordinates ( $\times 10^4$ ) and isotropic displacement parameters ( $\text{\AA}^2 \times 10^3$ ) for 11mxulh.

|        | x        | y        | z      | U (eq) |
|--------|----------|----------|--------|--------|
| H(10)  | 5672(14) | 3510(20) | 713(8) | 20     |
| H(20)  | 4272(12) | 1280(20) | 384(9) | 18     |
| H(30)  | 1794(13) | 2840(30) | -19(5) | 17     |
| H(40)  | 5649(10) | 8860(30) | 600(9) | 21     |
| H(1)   | 4431     | 5913     | 1760   | 11     |
| H(2)   | 4550     | 5558     | 360    | 11     |
| H(3)   | 3787     | 2827     | 1138   | 12     |
| H(4)   | 2723     | 5042     | 74     | 11     |
| H(5A)  | 1948     | 6333     | 966    | 12     |
| H(5B)  | 2718     | 5137     | 1521   | 12     |
| H(6A)  | 5137     | 8847     | 1774   | 15     |
| H(6B)  | 5872     | 7407     | 1498   | 15     |
| H(7A)  | 2477     | 9328     | 1288   | 14     |
| H(7B)  | 3624     | 9926     | 1407   | 14     |
| H(8A)  | 2713     | 7802     | 2356   | 17     |
| H(8B)  | 3901     | 8028     | 2460   | 17     |
| H(9A)  | 3686     | 11381    | 2508   | 19     |
| H(9B)  | 2517     | 11047    | 2478   | 19     |
| H(10A) | 4047     | 9683     | 3579   | 21     |
| H(10B) | 2875     | 9430     | 3553   | 21     |
| H(11A) | 3899     | 12967    | 3713   | 23     |
| H(11B) | 2715     | 12763    | 3654   | 23     |
| H(12A) | 2926     | 11114    | 4700   | 24     |
| H(12B) | 4109     | 10955    | 4735   | 24     |
| H(15)  | 4413     | 16356    | 6963   | 27     |
| H(16)  | 4354     | 13602    | 7614   | 28     |
| H(18)  | 3663     | 10632    | 5813   | 26     |
